# Supplementary material for: Completeness of radiosonde humidity observations based on the IGRA
Source: Copernicus journal article supplement (doi:10.5194/essd-2018-95), 2018-10-15
Supplement: Supplementary file 1 [file essd-2018-95-supplement.zip]

**Table S2: GUAN stations\*, periods of record for humidity, elapsed days and counts of humidity observations\*\***

(\*) Underlined WMO numbers denote current/2018 GRUAN sites. (\*\*) Between 1st day of 'Begin Date' and 31 Dec of ending year of 'Hum POR' (until 2016).

| Region | WMO #        | Station Name, Country          | Begin Date | Hum POR   | # Days | Hum Obs 00Z | Hum Obs 12Z | Hum Obs OTH   |
|--------|--------------|--------------------------------|------------|-----------|--------|-------------|-------------|---------------|
|        |              |                                | (in GUAN)  |           |        | (23Z-01Z)   | (11Z-13Z)   | (other hours) |
| 1      | <u>60018</u> | TENERIFE-GUIMAR, SPAIN         | Dec 2002   | 2002-2016 | 5145   | 4895        | 4893        | 66            |
| 1      | 60680        | TAMANRASSET, ALGERIA           | Oct 2001   | 2001-2016 | 5571   | 5367        | 5155        | 263           |
| 1      | 61052        | NIAMEY-AERO, NIGER             | Oct 2001   | 2001-2016 | 5571   | 4878        | 4928        | 610           |
| 1      | 61641        | DAKAR/YOFF, SENEGAL            | Oct 2001   | 2001-2016 | 5571   | 5078        | 5130        | 23            |
| 1      | 61901        | ST. HELENA ISLAND, ST. HELENA  | Oct 2001   | 2001-2016 | 5571   | 0           | 4392        | 1             |
| 1      | 61980        | SAINT-DENIS/GILLOT, REUNION    | Jul 2012   | 2012-2016 | 1645   | 1           | 1633        | 7             |
| 1      | 61995        | VACOAS, MAURITIUS              | Oct 2001   | 2001-2015 | 5205   | 1257        | 850         | 380           |
| 1      | 61998        | PORT-AUX-FRANCAIS, TAAF        | Oct 2001   | 2001-2016 | 5571   | 3           | 5186        | 10            |
| 1      | 62414        | ASSWAN, EGYPT                  | Oct 2001   | 2001-2016 | 5571   | 4386        | 1770        | 24            |
| 1      | 62721        | KHARTOUM, SUDAN                | Jan 2013   | 2013-2014 | 730    | 0           | 224         | 4             |
| 1      | 63450        | ADDIS ABABA, ETHIOPIA          | Oct 2001   | 2002-2004 | 1096   | 0           | 203         | 2             |
|        |              |                                |            | 2006-2016 | 4018   | 1           | 1837        | 14            |
| 1      | 63741        | NAIROBI/DAGORETTI, KENYA       | Oct 2001   | 2001-2016 | 5571   | 4254        | 167         | 19            |
| 1      | 63894        | DAR ES SALAAM, TANZANIA        | Jan 2005   | 2005-2006 | 730    | 0           | 267         | 0             |
|        |              |                                |            | 2009-2013 | 1826   | 4           | 503         | 4             |
| 1      | 63985        | SEYCHELLES IAP, SHEYCHELLES    | Oct 2001   | 2001-2016 | 5571   | 3559        | 2950        | 175           |
| 1      | 64910        | DOUALA OBS, CAMEROON           | Oct 2001   | 2001-2016 | 5571   | 2962        | 3211        | 10            |
| 1      | 65578        | ABIDJAN, COTE D'IVOIRE         | Oct 2001   | 2006-2016 | 4018   | 2638        | 2706        | 352           |
| 1      | 67083        | ANTANANARIVO/IVATO, MADAGASCAR | Jan 2006   | 2006-2016 | 4018   | 2682        | 2671        | 9             |
| 1      | 67774        | HARARE, ZIMBABWE               | Oct 2001   | 2002-2012 | 4018   | 659         | 2           | 55            |
|        |              |                                |            | 2015-2015 | 365    | 215         | 0           | 0             |
| 1      | 68110        | WINDHOEK, NAMIBIA              | Oct 2001   | 2006-2016 | 4018   | 0           | 2281        | 75            |
| 1      | 68592        | LA MERCY, SOUTH AFRICA         | Nov 2010   | 2010-2016 | 2253   | 2041        | 1974        | 1             |
| 1      | 68816        | CAPE TOWN AP, SOUTH AFRICA     | Oct 2001   | 2001-2016 | 5571   | 4856        | 4093        | 448           |
| 1      | 68906        | GOUGH IS., SOUTH AFRICA        | Oct 2001   | 2001-2016 | 5571   | 4295        | 4068        | 152           |
| 1      | 68994        | MARION IS., SOUTH AFRICA       | Oct 2001   | 2001-2014 | 4840   | 3506        | 3002        | 224           |
|        |              |                                |            | 2016-2016 | 366    | 243         | 220         | 128           |
| 2      | 20674        | OSTROV DIKSON, RUSS FED        | Oct 2001   | 2001-2016 | 5571   | 4433        | 4298        | 9             |
| 2      | 23472        | TURUHANSK, RUSS FED            | Oct 2001   | 2001-2016 | 5571   | 5346        | 5182        | 1             |
| 2      | 23921        | IVDEL, RUSS FED                | Jan 2005   | 2005-2016 | 4383   | 4331        | 4245        | 1             |
| 2      | 24266        | VERHOJANSK, RUSS FED           | Oct 2001   | 2001-2016 | 5571   | 5366        | 5334        | 24            |
| 2      | 27459        | NIZHNIJ NOVGOROD, RUSS FED     | Jan 2005   | 2005-2016 | 4383   | 3866        | 3784        | 0             |
| 2      | 28698        | OMSK, RUSS FED                 | Oct 2001   | 2001-2016 | 5571   | 5056        | 5321        | 10            |
| 2      | 29862        | HAKASSKAYA, RUSS FED           | Jan 2005   | 2005-2016 | 4383   | 4279        | 3836        | 5             |
| 2      | 30230        | KIRENSK, RUSS FED              | Oct 2001   | 2001-2016 | 5571   | 5155        | 4962        | 1             |
| 2      | 31088        | OHOTSK, RUSS FED               | Jan 2005   | 2005-2016 | 4383   | 4218        | 4329        | 0             |
| 2      | 32540        | PETROPAVLOVSK, RUSS FED        | Oct 2001   | 2001-2016 | 5571   | 5210        | 5368        | 47            |
| 2      | 35121        | ORENBURG, RUSS FED             | Oct 2001   | 2001-2016 | 5571   | 4427        | 5337        | 1             |
| 2      | 40745        | MASHHAD, IRAN                  | Jan 2005   | 2005-2016 | 4383   | 4036        | 2705        | 2             |
| 2      | 41112        | ABHA, SAUDI ARABIA             | Dec 2002   | 2002-2016 | 5145   | 4353        | 4479        | 99            |
| 2      | 41217        | ABU DHABI INT'L AP, UAE        | Oct 2001   | 2001-2016 | 5571   | 5075        | 4240        | 9             |
| 2      | 41780        | KARACHI, PAKISTAN              | Nov 2010   | 2010-2012 | 792    | 253         | 0           | 3             |
| 2      | 42182        | NEW DELHI, INDIA               | Jun 2017   | n/a       | n/a    | n/a         | n/a         | n/a           |

|   |       |                                 |          |           |      |      |      |     |
|---|-------|---------------------------------|----------|-----------|------|------|------|-----|
| 2 | 42410 | GUWAHATI, INDIA                 | Jun 2017 | n/a       | n/a  | n/a  | n/a  | n/a |
| 2 | 42809 | KOLKATA, INDIA                  | Jun 2017 | n/a       | n/a  | n/a  | n/a  | n/a |
| 2 | 42867 | NAGPUR, INDIA                   | Jun 2017 | n/a       | n/a  | n/a  | n/a  | n/a |
| 2 | 43003 | MUMBAI, INDIA                   | Jun 2017 | n/a       | n/a  | n/a  | n/a  | n/a |
| 2 | 43279 | CHENNAI, INDIA                  | Jun 2017 | n/a       | n/a  | n/a  | n/a  | n/a |
| 2 | 43599 | GAN, MALDIVES                   | Jan 2005 | 2005-2016 | 4383 | 285  | 2186 | 939 |
| 2 | 45004 | KING'S PARK, HONG KONG          | Oct 2001 | 2001-2016 | 5571 | 5564 | 5565 | 9   |
| 2 | 47138 | POHANG,KOREA                    | Dec 2002 | 2002-2016 | 5145 | 5098 | 5099 | 241 |
| 2 | 47412 | SAPPORO, JAPAN                  | Oct 2001 | 2001-2016 | 5571 | 5570 | 5567 | 51  |
| 2 | 47646 | TATENO, JAPAN                   | Oct 2001 | 2001-2016 | 5571 | 5569 | 5566 | 153 |
| 2 | 47827 | KAGOSHIMA, JAPAN                | Oct 2001 | 2001-2016 | 5571 | 5562 | 5568 | 221 |
| 2 | 47918 | ISHIGAKIJIMA, JAPAN             | Feb 2008 | 2008-2016 | 3257 | 3235 | 3212 | 104 |
| 2 | 47971 | CHICHIJIMA, JAPAN               | Oct 2001 | 2001-2016 | 5571 | 5557 | 5556 | 31  |
| 2 | 47991 | MINAMITORISHIMA, JAPAN          | Oct 2001 | 2001-2016 | 5571 | 5517 | 5494 | 21  |
| 2 | 48327 | CHIANG MAI, THAILAND            | Nov 2010 | 2010-2016 | 2253 | 1397 | 0    | 2   |
| 2 | 48453 | BANGNA, THAILAND                | Nov 2010 | 2010-2016 | 2253 | 1405 | 8    | 12  |
| 2 | 50527 | HAILAR, CHINA                   | Oct 2001 | 2001-2016 | 5571 | 5561 | 5564 | 0   |
| 2 | 51709 | KASHI, CHINA                    | Oct 2001 | 2001-2016 | 5571 | 5569 | 5568 | 1   |
| 2 | 52681 | MINQIN, CHINA                   | Oct 2001 | 2001-2016 | 5571 | 5569 | 5568 | 0   |
| 2 | 53068 | ERENHOT, CHINA                  | Oct 2001 | 2001-2016 | 5571 | 5559 | 5563 | 0   |
| 2 | 55299 | NAGQU, CHINA                    | Oct 2001 | 2001-2016 | 5571 | 5560 | 5551 | 0   |
| 2 | 56778 | KUNMING, CHINA                  | Oct 2001 | 2001-2016 | 5571 | 5568 | 5567 | 2   |
| 2 | 57461 | YICHANG, CHINA                  | Oct 2001 | 2001-2016 | 5571 | 5568 | 5570 | 0   |
| 3 | 80222 | BOGOTA/EL DORADO, COLOMBIA      | Oct 2001 | 2001-2016 | 5571 | 57   | 4474 | 40  |
| 3 | 81405 | CAYENNE/ROCHAMBEAU, F. GUIANA   | Oct 2001 | 2001-2016 | 5571 | 5419 | 5452 | 196 |
| 3 | 82193 | BELEM, BRAZIL                   | Oct 2001 | 2001-2016 | 5571 | 4090 | 4638 | 1   |
| 3 | 82332 | MANAUS, BRAZIL                  | Oct 2001 | 2001-2016 | 5571 | 4215 | 4638 | 1   |
| 3 | 82397 | FORTALEZA, BRAZIL               | Oct 2001 | 2001-2016 | 5571 | 28   | 4554 | 0   |
| 3 | 83378 | BRASILIA AEROPORTO, BRAZIL      | Oct 2001 | 2001-2016 | 5571 | 4285 | 5027 | 2   |
| 3 | 83779 | MARTE, BRAZIL                   | Oct 2001 | 2001-2016 | 5571 | 4938 | 5286 | 2   |
| 3 | 84008 | SAN CRISTOBAL, ECUADOR          | Oct 2001 | 2002-2016 | 5479 | 50   | 1932 | 62  |
| 3 | 84628 | LIMA-CALLAO/CHAVEZ, PERU        | Oct 2001 | 2001-2005 | 1553 | 5    | 623  | 146 |
|   |       |                                 |          | 2009-2014 | 2191 | 5    | 1087 | 31  |
|   |       |                                 |          | 2016-2016 | 366  | 0    | 44   | 5   |
| 3 | 85442 | ANTOFAGASTA, CHILE              | Oct 2001 | 2001-2016 | 5571 | 31   | 5315 | 5   |
| 3 | 85469 | ISLA DE PASCUA, CHILE           | Oct 2001 | 2001-2016 | 5571 | 4848 | 2    | 1   |
| 3 | 85586 | SANTO DOMINGO, CHILE            | Dec 2002 | 2002-2016 | 5145 | 3839 | 4959 | 3   |
| 3 | 85799 | PUERTO MONTT, CHILE             | Oct 2001 | 2001-2016 | 5571 | 0    | 5246 | 0   |
| 3 | 85934 | PUNTA ARENAS, CHILE             | Oct 2001 | 2001-2016 | 5571 | 2    | 5203 | 3   |
| 3 | 87155 | RESISTENCIA AERO, ARGENTINA     | Jan 2005 | 2005-2016 | 4383 | 594  | 3470 | 1   |
| 3 | 87576 | BUENO AIRES, ARGENTINA          | Dec 2002 | 2002-2016 | 5145 | 721  | 4827 | 2   |
| 3 | 87860 | COMODORO RIVADAVIA, ARGENTINA   | Oct 2001 | 2001-2001 | 92   | 0    | 22   | 0   |
|   |       |                                 |          | 2004-2016 | 4749 | 271  | 4094 | 0   |
| 3 | 88889 | MOUNT PLEASANT AP, FALKLAND IS. | Oct 2001 | 2001-2016 | 5571 | 5175 | 2795 | 222 |
| 4 | 70026 | BARROW, AK, USA                 | Oct 2001 | 2001-2016 | 5571 | 5530 | 5524 | 16  |
| 4 | 70308 | ST. PAUL IS., AK, USA           | Oct 2001 | 2001-2016 | 5571 | 5513 | 5521 | 6   |
| 4 | 70398 | ANNETTE IS., AK, USA            | Oct 2001 | 2001-2016 | 5571 | 5503 | 5486 | 4   |
| 4 | 71082 | ALERT, N.W.T., CANADA           | Oct 2001 | 2001-2016 | 5571 | 5478 | 5467 | 450 |

|   |                  |                                 |          |           |      |      |      |      |
|---|------------------|---------------------------------|----------|-----------|------|------|------|------|
| 4 | 71816            | GOOSE BAY, CANADA               | Oct 2001 | 2001-2016 | 5571 | 5533 | 5536 | 52   |
| 4 | 71836            | MOOSONEE, CANADA                | Oct 2001 | 2001-2016 | 5571 | 5539 | 5524 | 3    |
| 4 | 71925            | CAMBRIDGE BAY A, CANADA         | Jan 2005 | 2005-2016 | 4383 | 4357 | 4339 | 2    |
| 4 | 71934            | FORT SMITH, CANADA              | Oct 2001 | 2001-2016 | 5571 | 5546 | 5530 | 2    |
| 4 | 72201            | KEY WEST, FL, USA               | Oct 2001 | 2001-2016 | 5571 | 5506 | 5502 | 284  |
| 4 | 72250            | BROWNSVILLE, TX, USA            | Sep 2004 | 2004-2016 | 4505 | 4466 | 4473 | 147  |
| 4 | 72293            | SAN DIEGO, CA, USA              | Oct 2001 | 2001-2016 | 5571 | 5535 | 5533 | 49   |
| 4 | 72451            | DODGE CITY, KS, USA             | Sep 2004 | 2004-2016 | 4505 | 4471 | 4473 | 108  |
| 4 | 72520            | PITTSBURGH, PA, USA             | Sep 2004 | 2004-2016 | 4505 | 4465 | 4463 | 114  |
| 4 | 72597            | MEDFORD, OR, USA                | Oct 2001 | 2001-2016 | 5571 | 5551 | 5551 | 28   |
| 4 | 72776            | GREAT FALLS, MT, USA            | Sep 2004 | 2004-2016 | 4505 | 4458 | 4453 | 74   |
| 4 | 76654            | MANZANILLO, MEXICO              | Oct 2001 | 2001-2016 | 5571 | 1914 | 4427 | 6    |
| 4 | 78016            | BERMUDA NAS KINDLEY, BERMUDA    | Oct 2001 | 2001-2016 | 5571 | 4024 | 5475 | 80   |
| 4 | 78397            | KINGSTON, JAMAICA               | Oct 2001 | 2001-2012 | 4110 | 795  | 3329 | 88   |
|   |                  |                                 |          | 2014-2016 | 1096 | 269  | 697  | 11   |
| 4 | 78526            | SAN JUAN, PUERTO RICO           | Oct 2001 | 2001-2016 | 5571 | 5526 | 5529 | 122  |
| 4 | 78583            | BELIZE/PHILLIP GOLDSTON, BELIZE | Oct 2001 | 2001-2016 | 5571 | 1232 | 4359 | 47   |
| 4 | 78762            | SAN JOSE/EL COCO, COSTA RICA    | Oct 2001 | 2003-2008 | 2192 | 306  | 1285 | 557  |
|   |                  |                                 |          | 2012-2016 | 1827 | 0    | 1031 | 0    |
| 4 | 78954            | GRANTLEY ADAMS IAP, BARBADOS    | Oct 2001 | 2001-2016 | 5571 | 1196 | 4561 | 17   |
| 4 | 78988            | HATO AIRPORT, CURACAO           | Jan 2005 | 2005-2016 | 4383 | 773  | 3095 | 16   |
| 4 | 80001            | SAN ANDRES ISLAND, COLOMBIA     | Nov 2010 | 2010-2016 | 2253 | 357  | 1453 | 5    |
| 5 | <del>48698</del> | SINGAPORE/CHANGI AP, SINGAPORE  | Oct 2001 | 2001-2016 | 5571 | 5539 | 4913 | 469  |
| 5 | 91212            | AGANA, GUAM                     | Dec 2002 | 2002-2016 | 5145 | 5001 | 5002 | 176  |
| 5 | 91285            | HILO/LYMAN, HAWAII, USA         | Oct 2001 | 2001-2016 | 5571 | 5544 | 5534 | 110  |
| 5 | 91334            | CHUUK, MICRONESIA               | Oct 2001 | 2001-2016 | 5571 | 5471 | 5422 | 97   |
| 5 | 91376            | MAJURO ATOLL, MARSHALL IS.      | Oct 2001 | 2001-2016 | 5571 | 5501 | 5482 | 14   |
| 5 | 91408            | KOROR, PALAU                    | Oct 2001 | 2001-2016 | 5571 | 5524 | 5522 | 561  |
| 5 | 91517            | HONIARA, SOLOMON IS.            | Oct 2001 | 2007-2011 | 1826 | 879  | 0    | 0    |
| 5 | 91557            | BAUERFIELD, VANUATU             | Oct 2001 | 2006-2009 | 1461 | 603  | 0    | 0    |
|   |                  |                                 |          | 2013-2016 | 1461 | 405  | 0    | 0    |
| 5 | 91592            | TONTOUTA, NEW CALEDONIA         | Oct 2001 | 2001-2016 | 5571 | 5452 | 4993 | 580  |
| 5 | 91610            | TARAWA, KIRIBATI                | Oct 2001 | 2001-2016 | 5571 | 4063 | 11   | 14   |
| 5 | 91643            | FUNAFUTI, TUVALU                | Oct 2001 | 2001-2016 | 5571 | 4343 | 11   | 23   |
| 5 | 91680            | NADI, FIJI                      | Jan 2006 | 2006-2016 | 4018 | 3860 | 1405 | 1    |
| 5 | 91765            | PAGO PAGO, AM. SAMOA            | Oct 2001 | 2001-2016 | 5571 | 5418 | 5285 | 30   |
| 5 | 91843            | RAROTONGA, COOK IS.             | Jan 2006 | 2009-2016 | 2922 | 2457 | 0    | 0    |
| 5 | 91925            | ATUONA, F. POLINESIA            | Oct 2001 | 2001-2016 | 5571 | 5451 | 1196 | 18   |
| 5 | 91938            | TAHITI-FAAA, F. POLINESIA       | Oct 2001 | 2001-2016 | 5571 | 5532 | 5504 | 72   |
| 5 | 91958            | RAPA, AUSTRAL IS.               | Oct 2001 | 2001-2016 | 5571 | 2732 | 605  | 2724 |
| 5 | 92035            | PORT MORESBY, PAPUA             | Oct 2001 | 2002-2008 | 2557 | 478  | 0    | 1    |
|   |                  |                                 |          | 2010-2013 | 1461 | 632  | 0    | 2    |
| 5 | 93417            | PARAPARAUMU, NEW ZEALAND        | Oct 2001 | 2001-2016 | 5571 | 5314 | 5269 | 474  |
| 5 | 93844            | INVERCARGILL, NEW ZEALAND       | Oct 2001 | 2001-2016 | 5571 | 5231 | 5221 | 610  |
| 5 | 93997            | RAOUL/KERMADEC IS., NEW ZEALAND | Oct 2001 | 2001-2016 | 5571 | 3832 | 1    | 1310 |
| 5 | <u>94120</u>     | DARWIN, AUSTRALIA               | Oct 2001 | 2001-2016 | 5571 | 5485 | 5466 | 0    |
| 5 | 94203            | BROOME AP, AUSTRALIA            | Oct 2001 | 2001-2016 | 5571 | 5522 | 496  | 0    |
| 5 | 94294            | TOWNSVILLE, AUSTRALIA           | Oct 2001 | 2001-2016 | 5571 | 5517 | 505  | 1    |

|   |       |                                |          |           |      |      |      |      |
|---|-------|--------------------------------|----------|-----------|------|------|------|------|
| 5 | 94299 | WILLIS ISLAND, AUSTRALIA       | Jan 2007 | 2007-2016 | 3653 | 3351 | 577  | 0    |
| 5 | 94302 | LEARMONTH AP, AUSTRALIA        | Oct 2001 | 2001-2016 | 5571 | 5173 | 5123 | 0    |
| 5 | 94461 | GILES, AUSTRALIA               | Oct 2001 | 2001-2016 | 5571 | 5510 | 144  | 0    |
| 5 | 94510 | CHARLEVILLE, AUSTRALIA         | Oct 2001 | 2001-2016 | 5571 | 5292 | 1634 | 0    |
| 5 | 94610 | PERTH AP, AUSTRALIA            | Oct 2001 | 2001-2016 | 5571 | 5503 | 5503 | 1    |
| 5 | 94659 | WOOMERA, AUSTRALIA             | Oct 2001 | 2001-2016 | 5571 | 5387 | 1530 | 1    |
| 5 | 94975 | HOBART AP, AUSTRALIA           | Oct 2001 | 2001-2016 | 5571 | 5548 | 5490 | 9    |
| 5 | 94995 | LORD HOWE IS., AUSTRALIA       | Oct 2001 | 2001-2016 | 5571 | 5402 | 343  | 0    |
| 5 | 94996 | NORFOLK IS., AUSTRALIA         | Oct 2001 | 2001-2016 | 5571 | 5377 | 4    | 0    |
| 5 | 94998 | MACQUARIE IS., AUSTRALIA       | Oct 2001 | 2001-2016 | 5571 | 5457 | 5321 | 0    |
| 5 | 96315 | BRUNEI AP, BRUNEI              | Oct 2001 | 2001-2016 | 5571 | 4862 | 4264 | 4    |
| 5 | 96935 | SURABAJA, INDONESIA            | Oct 2001 | 2001-2016 | 5571 | 4150 | 3482 | 0    |
| 5 | 96996 | COCOS ISLAND, AUSTRALIA        | Oct 2001 | 2001-2016 | 5571 | 5074 | 1179 | 0    |
| 5 | 98223 | LAOAG, PHILLIPINES             | Oct 2001 | 2001-2016 | 5571 | 3775 | 1800 | 36   |
| 6 | 01001 | JAN MAYEN, NORWAY              | Oct 2001 | 2001-2016 | 5571 | 5491 | 5490 | 2803 |
| 6 | 02836 | SODANKYLA, FINLAND             | Oct 2001 | 2001-2016 | 5571 | 5487 | 5523 | 138  |
| 6 | 03005 | LERWICK, UNITED KINGDOM        | Oct 2001 | 2001-2016 | 5571 | 5553 | 5557 | 616  |
| 6 | 03808 | CAMBORNE, UNITED KINGDOM       | Oct 2001 | 2001-2016 | 5571 | 5539 | 5546 | 881  |
| 6 | 03953 | VALENTIA OBSERVATORY, IRELAND  | Oct 2001 | 2001-2016 | 5571 | 5556 | 5547 | 7663 |
| 6 | 04018 | KEFLAVIKUR-FLUGVOLLUR, ICELAND | Oct 2001 | 2001-2016 | 5571 | 5227 | 5232 | 149  |
| 6 | 04270 | NARSARUAQM, GREENLAND          | Oct 2001 | 2001-2016 | 5571 | 5462 | 5490 | 75   |
| 6 | 06610 | PAYERNE, SWITZERLAND           | Feb 2008 | 2008-2016 | 3257 | 3232 | 3254 | 119  |
| 6 | 08001 | LA CORUNA, SPAIN               | Nov 2010 | 2010-2016 | 2253 | 2168 | 2179 | 27   |
| 6 | 08430 | MURCIA, SPAIN                  | Jan 2013 | 2013-2016 | 1461 | 1434 | 1449 | 0    |
| 6 | 08508 | LAJES/SANTA RITA, AZ, PORTUGAL | Oct 2001 | 2001-2016 | 5571 | 793  | 4891 | 87   |
| 6 | 10393 | LINDENBERG, GERMANY            | Jan 2005 | 2005-2016 | 4383 | 4371 | 4374 | 8749 |
| 6 | 11035 | WIEN/HOHE WARTE, AUSTRIA       | Dec 2002 | 2002-2016 | 5145 | 5125 | 5131 | 573  |
| 6 | 14430 | ZADAR, CROATIA                 | Nov 2010 | 2010-2016 | 2253 | 2148 | 2070 | 7    |
| 6 | 15420 | BUCHAREST-BANEASA, ROMANIA     | Sep 2013 | 2013-2016 | 1218 | 1213 | 1217 | 1    |
| 6 | 15614 | SOFIA, BULGARIA                | Nov 2010 | 2010-2016 | 2253 | 0    | 2233 | 1    |
| 6 | 16245 | PARTICA DI MARE, ITALY         | Oct 2001 | 2001-2016 | 5571 | 5451 | 5405 | 3374 |
| 6 | 17130 | ANKARA/CENTRAL, TURKEY         | Oct 2001 | 2001-2016 | 5571 | 5564 | 5532 | 2    |
| 6 | 17607 | ATHALASSA, CYPRUS              | Nov 2010 | 2010-2016 | 2253 | 0    | 1762 | 1855 |
| 6 | 22543 | ARHANGEL'SK, RUSSIA            | Nov 2010 | 2010-2016 | 2253 | 2222 | 2151 | 0    |
| 6 | 27459 | NIZHNIJ NOVGOROD, RUSSIA       | Nov 2010 | 2010-2016 | 2253 | 2229 | 2135 | 0    |
| 6 | 33345 | KYIV, RUSS FED                 | Oct 2001 | 2001-2016 | 5571 | 5200 | 4226 | 2    |
| 6 | 37789 | YEREVAN, ARMENIA               | Dec 2002 | 2002-2009 | 2588 | 1434 | 2    | 4    |
|   |       |                                |          | 2012-2015 | 1461 | 1088 | 0    | 0    |
| 6 | 40265 | MAFRAQ, JORDAN                 | Nov 2010 | 2010-2016 | 2253 | 1999 | 26   | 3    |
| 7 | 89002 | VAN NEUMAYER, ANTARCTICA       | Oct 2001 | 2001-2016 | 5571 | 148  | 5060 | 278  |
| 7 | 89009 | AMUNDSEN-SCOTT, ANTARCTICA     | Oct 2001 | 2001-2016 | 5571 | 5357 | 2464 | 46   |
| 7 | 89022 | HALLEY BAY, ANTARCTICA         | Oct 2001 | 2001-2016 | 5571 | 1    | 4990 | 6    |
| 7 | 89055 | MARAMBIO, ANTARCTICA           | Oct 2001 | 2001-2016 | 5571 | 7    | 1371 | 18   |
| 7 | 89512 | NOVOLAZARAVSKAJA, ANTARCTICA   | Oct 2001 | 2001-2016 | 5571 | 5436 | 843  | 0    |
| 7 | 89532 | SYOWA, ANTARCTICA              | Oct 2001 | 2001-2016 | 5571 | 4832 | 4847 | 12   |
| 7 | 89564 | MAWSON BASE, ANTARCTICA        | Oct 2001 | 2001-2016 | 5571 | 2282 | 4170 | 2    |
| 7 | 89571 | DAVIS BASE, ANTARCTICA         | Oct 2001 | 2001-2016 | 5571 | 5134 | 3663 | 6    |
| 7 | 89592 | MIRNYJ, ANTARCTICA             | Oct 2001 | 2001-2016 | 5571 | 5369 | 826  | 0    |

|   |       |                              |          |           |      |      |      |     |
|---|-------|------------------------------|----------|-----------|------|------|------|-----|
| 7 | 89611 | CASEY, ANTARCTICA            | Oct 2001 | 2001-2016 | 5571 | 5260 | 4635 | 3   |
| 7 | 89642 | DUMONT D'URVILLE, ANTARCTICA | Oct 2001 | 2001-2016 | 5571 | 5453 | 104  | 222 |
| 7 | 89664 | MCMURDO, ANTARCTICA          | Oct 2001 | 2001-2016 | 5571 | 4542 | 2423 | 21  |
