# Supplementary material for: Completeness of radiosonde humidity observations based on the IGRA
Source: Copernicus journal article supplement (doi:10.5194/essd-2018-95), 2018-10-15
Supplement: Supplementary file 2 [file essd-2018-95-supplement.zip]

Periods (in round years) and statistics until 31 Dec 2016. Underlined IGRA ID codes denote current/2018 GRUAN sites.

[illegible]

[illegible]

|             |         |          |     |                             |           |           |           |       |
|-------------|---------|----------|-----|-----------------------------|-----------|-----------|-----------|-------|
| ARM00088946 | 59°27'S | 27°16'W  | 15  | CORBETA URUGUAY DN          | Argentina | 1980/1981 | 1980-1981 | 275   |
| ASM00094120 | 12°25'S | 130°54'E | 31  | DARWIN AIRPORT              | Australia | 1943/2016 | 1943-2016 | 35267 |
| ASM00094150 | 12°16'S | 136°49'E | 63  | GOVE AIRPORT                | Australia | 1985/2016 | 1985-2016 | 10567 |
| ASM00094170 | 12°41'S | 141°55'E | 19  | WEIPA AERO                  | Australia | 1993/2016 | 1998-2016 | 8061  |
| ASM00094175 | 10°35'S | 142°13'E | 60  | THURSDAY IL/HORN IL         | Australia | 1951/1993 | 1992-1993 | 230   |
| ASM00094203 | 17°57'S | 122°14'E | 17  | BROOME AIRPORT              | Australia | 1950/2016 | 1965-2016 | 18722 |
| ASM00094212 | 18°14'S | 127°40'E | 410 | HALLS CREEK AIRPORT         | Australia | 1950/2016 | 1962-1962 | 1     |
|             |         |          |     |                             |           |           | 2005-2006 | 157   |
| ASM00094238 | 19°39'S | 134°11'E | 377 | TENNANT CREEK AIRPORT       | Australia | 1969/2012 | 2012-2012 | 146   |
| ASM00094287 | 16°52'S | 145°45'E | 3   | CAIRNS AERO                 | Australia | 1947/2014 | 2002-2002 | 3     |
|             |         |          |     |                             |           |           | 2004-2006 | 337   |
| ASM00094294 | 19°15'S | 146°46'E | 6   | TOWNSVILLE AERO             | Australia | 1943/2016 | 1943-1946 | 623   |
|             |         |          |     |                             |           |           | 1949-2016 | 24234 |
| ASM00094299 | 16°17'S | 149°58'E | 9   | WILLIS ISLAND               | Australia | 1947/2016 | 1960-2004 | 14539 |
|             |         |          |     |                             |           |           | 2006-2016 | 3997  |
| ASM00094300 | 24°53'S | 113°40'E | 4   | CARNARVON AIRPORT           | Australia | 1950/2012 | 1961-1990 | 9452  |
|             |         |          |     |                             |           |           | 2004-2006 | 23    |
| ASM00094302 | 22°14'S | 114° 6'E | 6   | LEARMONTH AIRPORT           | Australia | 1975/2016 | 1988-2016 | 15519 |
| ASM00094312 | 20°22'S | 118°38'E | 10  | PORT HEDLAND AIRPORT        | Australia | 1950/2016 | 1950-2016 | 24826 |
| ASM00094326 | 23°48'S | 133°53'E | 545 | ALICE SPRINGS AIRPORT       | Australia | 1946/2016 | 1946-2016 | 23746 |
| ASM00094332 | 20°41'S | 139°29'E | 342 | MOUNT ISA AERO              | Australia | 1975/2016 | 1975-2016 | 16667 |
| ASM00094335 | 20°40'S | 140°30'E | 189 | CLONCURRY                   | Australia | 1943/1975 | 1943-1975 | 10673 |
| ASM00094346 | 23°26'S | 144°17'E | 191 | LONGREACH AERO              | Australia | 1966/2016 | 2004-2006 | 602   |
| ASM00094367 | 21° 7'S | 149°13'E | 30  | MACKAY M.O                  | Australia | 1959/2016 | 1973-1973 | 2     |
|             |         |          |     |                             |           |           | 2002-2006 | 675   |
| ASM00094374 | 23°23'S | 150°29'E | 10  | ROCKHAMPTON AERO            | Australia | 1943/2016 | 1993-2016 | 8302  |
| ASM00094380 | 23°51'S | 151°15'E | 75  | GLADSTONE                   | Australia | 1957/1993 | 1974-1993 | 6693  |
| ASM00094403 | 28°48'S | 114°42'E | 37  | GERALDTON AIRPORT           | Australia | 1950/2016 | 1988-2016 | 9817  |
| ASM00094430 | 26°37'S | 118°32'E | 522 | MEEKATHARRA AIRPORT         | Australia | 1951/2016 | 1994-2016 | 8413  |
| ASM00094461 | 25° 2'S | 128°18'E | 580 | GILES METEOROLOGICAL OFFICE | Australia | 1956/2016 | 1956-2016 | 22135 |
| ASM00094510 | 26°25'S | 146°15'E | 306 | CHARLEVILLE AERO            | Australia | 1942/2016 | 1943-2016 | 27965 |
| ASM00094568 | 27°39'S | 152°43'E | 26  | AMBERLEY                    | Australia | 1949/1955 | 1949-1955 | 2447  |
| ASM00094578 | 27°24'S | 153° 8'E | 4   | BRISBANE AERO               | Australia | 1943/2016 | 1943-1944 | 285   |
|             |         |          |     |                             |           |           | 1956-2016 | 27851 |
| ASM00094610 | 31°56'S | 115°59'E | 20  | PERTH AIRPORT               | Australia | 1948/2016 | 1948-2016 | 43237 |
| ASM00094637 | 30°47'S | 121°27'E | 367 | KALGOORLIE-BOULDER AIRPORT  | Australia | 1950/2016 | 1950-2016 | 23877 |
| ASM00094638 | 33°50'S | 121°54'E | 25  | ESPERANCE                   | Australia | 1969/2016 | 1969-2016 | 16988 |
| ASM00094646 | 30°50'S | 128° 6'E | 160 | FORREST AIRPORT             | Australia | 1950/1995 | 1956-1995 | 13205 |
| ASM00094647 | 31°40'S | 128°52'E | 101 | EUCLA                       | Australia | 1995/2012 | 1995-2012 | 7923  |
| ASM00094653 | 32° 8'S | 133°42'E | 24  | CEDUNA AMO                  | Australia | 1950/2016 | 2004-2008 | 329   |
|             |         |          |     |                             |           |           | 2012-2014 | 100   |
|             |         |          |     |                             |           |           | 2016-2016 | 11    |
| ASM00094659 | 31° 9'S | 136°48'E | 167 | WOOMERA AERODROME           | Australia | 1949/2016 | 1949-2016 | 26767 |
| ASM00094672 | 34°57'S | 138°31'E | 6   | ADELAIDE AIRPORT            | Australia | 1945/2016 | 1945-2016 | 43417 |
| ASM00094693 | 34°14'S | 142° 5'E | 51  | MILDURA AIRPORT             | Australia | 1950/2013 | 1998-1998 | 236   |
|             |         |          |     |                             |           |           | 2001-2006 | 1117  |
|             |         |          |     |                             |           |           | 2008-2008 | 1     |
| ASM00094711 | 31°29'S | 145°50'E | 260 | COBAR MO                    | Australia | 1962/2016 | 1962-2016 | 20786 |
| ASM00094750 | 34°57'S | 150°32'E | 122 | NOWRA RAN AIR STATION AWS   | Australia | 1950/2016 | 1955-1996 | 18813 |
|             |         |          |     |                             |           |           | 2013-2014 | 131   |

|             |         |          |      |                           |            |           |           |       |
|-------------|---------|----------|------|---------------------------|------------|-----------|-----------|-------|
|             |         |          |      |                           |            |           | 2016-2016 | 3     |
| ASM00094767 | 33°57'S | 151°10'E | 6    | SYDNEY AIRPORT AMO        | Australia  | 1946/2016 | 1976-2001 | 11415 |
|             |         |          |      |                           |            |           | 2003-2014 | 197   |
|             |         |          |      |                           |            |           | 2016-2016 | 2     |
| ASM00094772 | 30°13'S | 151°41'E | 1332 | GUYRA                     | Australia  | 1944/1954 | 1944-1945 | 286   |
|             |         |          |      |                           |            |           | 1953-1954 | 553   |
| ASM00094776 | 32°48'S | 151°50'E | 10   | WILLIAMTOWN RAAF          | Australia  | 1954/2016 | 1954-1958 | 2170  |
|             |         |          |      |                           |            |           | 1966-1970 | 2161  |
|             |         |          |      |                           |            |           | 1973-2016 | 18277 |
| ASM00094791 | 30°19'S | 153° 7'E | 6    | COFFS HARBOUR MO          | Australia  | 1951/2013 | 2002-2006 | 936   |
|             |         |          |      |                           |            |           | 2008-2008 | 1     |
| ASM00094802 | 34°56'S | 117°48'E | 71   | ALBANY AIRPORT            | Australia  | 1965/2016 | 1965-2016 | 17703 |
| ASM00094821 | 37°45'S | 140°46'E | 65   | MOUNT GAMBIER AERO        | Australia  | 1945/2016 | 1964-2016 | 18492 |
| ASM00094865 | 37°52'S | 144°45'E | 16   | LAVERTON AERODROME        | Australia  | 1948/1999 | 1948-1999 | 27826 |
| ASM00094866 | 37°40'S | 144°50'E | 132  | MELBOURNE AIRPORT         | Australia  | 1946/2016 | 1999-2016 | 12623 |
| ASM00094907 | 38° 6'S | 147° 8'E | 5    | EAST SALE (AUS-AFB)       | Australia  | 1950/2009 | 1998-1998 | 1     |
|             |         |          |      |                           |            |           | 2004-2008 | 270   |
| ASM00094910 | 35° 9'S | 147°27'E | 221  | WAGGA WAGGA AMO           | Australia  | 1946/2016 | 1965-2016 | 17834 |
| ASM00094970 | 42°53'S | 147°20'E | 55   | HOBART                    | Australia  | 1949/1953 | 1949-1953 | 1485  |
| ASM00094975 | 42°50'S | 147°30'E | 4    | HOBART AIRPORT            | Australia  | 1953/2016 | 1953-1958 | 1617  |
|             |         |          |      |                           |            |           | 1966-1970 | 2113  |
|             |         |          |      |                           |            |           | 1973-2016 | 29508 |
| ASM00094995 | 31°33'S | 159° 5'E | 5    | LORD HOWE ISLAND AERO     | Australia  | 1950/2016 | 1954-2016 | 22017 |
| ASM00094998 | 54°30'S | 158°56'E | 6    | MACQUARIE ISLAND          | Australia  | 1948/2016 | 1948-1948 | 181   |
|             |         |          |      |                           |            |           | 1950-2016 | 39261 |
| ASM00095527 | 29°29'S | 149°51'E | 214  | MOREE AERO                | Australia  | 1964/2016 | 1964-1988 | 7632  |
|             |         |          |      |                           |            |           | 1990-1993 | 1585  |
|             |         |          |      |                           |            |           | 1995-2016 | 8591  |
| ASXUA942005 | 19°17'S | 121°30'E | 3    | TALGARNO                  | Australia  | 1960/1961 | 1960-1961 | 297   |
| ASXUA946505 | 30° 1'S | 131°35'E | 290  | MARALINGA                 | Australia  | 1955/1965 | 1955-1964 | 2492  |
| AUM00011010 | 48°14'N | 14°11'E  | 298  | LINZ/HOERSCHING-FLUGHAFEN | Austria    | 1987/2016 | 1987-2016 | 9866  |
| AUM00011035 | 48°15'N | 16°21'E  | 200  | WIEN/HOHE WARTE           | Austria    | 1910/2016 | 1949-2016 | 45800 |
| AUM00011120 | 47°16'N | 11°21'E  | 581  | INNSBRUCK-FLUGHAFEN       | Austria    | 1998/2016 | 1998-2016 | 6572  |
| AUM00011240 | 46°60'N | 15°26'E  | 340  | GRAZ-THALERHOF-FLUGHAFEN  | Austria    | 1995/2016 | 1995-2016 | 7690  |
| AYM00088967 | 77°58'S | 38°48'W  | 32   | GENERAL BELGRANO          | Antarctica | 1970/1975 | 1970-1972 | 1242  |
|             |         |          |      |                           |            |           | 1974-1975 | 535   |
| AYM00089001 | 70°18'S | 2°24'W   | 62   | SANAE                     | Antarctica | 1957/1992 | 1957-1959 | 1734  |
|             |         |          |      |                           |            |           | 1971-1972 | 124   |
| AYM00089002 | 70°40'S | 8°15'W   | 50   | NEUMAYER                  | Antarctica | 1984/2016 | 1984-2016 | 10625 |
| AYM00089009 | 90° 0'S | 0° 0'E   | 2835 | AMUNDSEN-SCOTT            | Antarctica | 1961/2016 | 1961-2016 | 21233 |
| AYM00089022 | 75°27'S | 26°13'W  | 30   | HALLEY                    | Antarctica | 1957/2016 | 1957-1962 | 2262  |
|             |         |          |      |                           |            |           | 1966-2016 | 12184 |
| AYM00089050 | 62°12'S | 58°54'W  | 16   | BELLINGSHAUSEN            | Antarctica | 1969/1999 | 1973-1987 | 3252  |
|             |         |          |      |                           |            |           | 1989-1999 | 2718  |
| AYM00089051 | 63°28'S | 56°17'W  | 18   | PETREL NAS                | Antarctica | 1969/1972 | 1969-1972 | 1653  |
| AYM00089055 | 64°14'S | 56°43'W  | 208  | BASE MARAMBIO             | Antarctica | 1982/2016 | 1982-1985 | 770   |
|             |         |          |      |                           |            |           | 1987-1996 | 1917  |
|             |         |          |      |                           |            |           | 1998-2016 | 1887  |
| AYM00089062 | 67°34'S | 68° 8'W  | 3    | ROTHERA                   | Antarctica | 2002/2016 | 2002-2016 | 2705  |
| AYM00089063 | 65°15'S | 64°16'W  | 11   | FARADAY                   | Antarctica | 1954/1982 | 1956-1962 | 2514  |

[illegible]

[illegible]

[illegible]

[illegible]



|             |         |          |     |                      |          |           |           |       |
|-------------|---------|----------|-----|----------------------|----------|-----------|-----------|-------|
| BRM00083937 | 29°43'S | 53°42'W  | 85  | SANTA MARIA (AERO)   | Brazil   | 2006/2016 | 2006-2016 | 6849  |
| BRM00083971 | 30° 0'S | 51°11'W  | 3   | PORTO ALEGRE (AERO)  | Brazil   | 1950/2016 | 1950-1954 | 494   |
|             |         |          |     |                      |          |           | 1964-2016 | 27403 |
| BUM00015614 | 42°39'N | 23°23'E  | 595 | SOFIA (OBSERV.)      | Bulgaria | 1955/2016 | 1955-2016 | 38378 |
| BUM00015730 | 41°39'N | 25°22'E  | 331 | KURDJALI             | Bulgaria | 1966/1991 | 1966-1972 | 928   |
|             |         |          |     |                      |          |           | 1974-1991 | 8643  |
| BXM00096315 | 4°56'N  | 114°56'E | 22  | BRUNEI AIRPORT       | Brunei   | 1981/2016 | 1981-2016 | 19696 |
| CAM00071043 | 65°17'N | 126°45'W | 94  | NORMAN WELLS UA      | Canada   | 1951/2016 | 1951-2016 | 45526 |
| CAM00071051 | 72° 0'N | 125°16'W | 84  | SACHS HARBOUR        | Canada   | 1955/1986 | 1955-1986 | 22042 |
| CAM00071072 | 76°15'N | 119°21'W | 58  | MOULD BAY            | Canada   | 1948/1997 | 1948-1997 | 34288 |
| CAM00071074 | 78°48'N | 103°30'W | 25  | ISACHSEN             | Canada   | 1948/1978 | 1948-1978 | 21180 |
| CAM00071081 | 68°46'N | 81°13'W  | 6   | HALL BEACH UA        | Canada   | 1957/2016 | 1957-2016 | 42501 |
| CAM00071082 | 82°30'N | 62°20'W  | 65  | ALERT UA             | Canada   | 1950/2016 | 1950-1996 | 32489 |
|             |         |          |     |                      |          |           | 1998-2016 | 14123 |
| CAM00071090 | 70°27'N | 68°33'W  | 2   | CLYDE RIVER          | Canada   | 1950/1970 | 1950-1970 | 13628 |
| CAM00071109 | 50°41'N | 127°23'W | 17  | PORT HARDY UA        | Canada   | 1951/2016 | 1951-1971 | 12721 |
|             |         |          |     |                      |          |           | 1977-2016 | 28361 |
| CAM00071115 | 50°14'N | 119°17'W | 556 | VERNON AUTO          | Canada   | 1972/1993 | 1972-1972 | 560   |
|             |         |          |     |                      |          |           | 1977-1993 | 11904 |
| CAM00071119 | 53°33'N | 114° 6'W | 766 | EDMONTON STONY PLAIN | Canada   | 1946/2016 | 1946-1949 | 480   |
|             |         |          |     |                      |          |           | 1954-1972 | 12420 |
|             |         |          |     |                      |          |           | 1977-2016 | 29207 |
| CAM00071124 | 54°45'N | 110° 3'W | 700 | PRIMROSE LAKE        | Canada   | 1968/2010 | 1968-1971 | 156   |
|             |         |          |     |                      |          |           | 1998-2000 | 111   |
|             |         |          |     |                      |          |           | 2004-2005 | 65    |
|             |         |          |     |                      |          |           | 2007-2007 | 45    |
|             |         |          |     |                      |          |           | 2009-2010 | 69    |
| CAM00071197 | 47°34'N | 59° 9'W  | 40  | PORT-AUX-BASQUES     | Canada   | 1994/1997 | 1994-1997 | 2197  |
| CAM00071203 | 49°56'N | 119°24'W | 456 | KELOWNA UA           | Canada   | 1994/2016 | 1994-2016 | 16470 |
| CAM00071569 | 50°12'N | 104°42'W | 580 | BRATT'S LAKE UA      | Canada   | 2004/2011 | 2004-2011 | 401   |
| CAM00071600 | 43°56'N | 60° 1'W  | 5   | SABLE ISLAND         | Canada   | 1954/2016 | 1954-1954 | 76    |
|             |         |          |     |                      |          |           | 1958-1972 | 10330 |
|             |         |          |     |                      |          |           | 1977-2016 | 28554 |
| CAM00071603 | 43°52'N | 66° 6'W  | 9   | YARMOUTH UA          | Canada   | 1988/2016 | 1989-2016 | 19611 |
| CAM00071625 | 45°57'N | 77°19'W  | 130 | PETAWAWA             | Canada   | 1986/2005 | 1986-1997 | 1131  |
|             |         |          |     |                      |          |           | 2004-2005 | 125   |
| CAM00071701 | 45°50'N | 66°26'W  | 51  | GAGETOWN A           | Canada   | 1971/2011 | 1971-1972 | 327   |
|             |         |          |     |                      |          |           | 1977-2011 | 8918  |
| CAM00071716 | 46°54'N | 71°29'W  | 178 | VALCARTIER AIRPORT   | Canada   | 1977/2006 | 1977-1979 | 169   |
|             |         |          |     |                      |          |           | 1982-1986 | 354   |
|             |         |          |     |                      |          |           | 1988-1997 | 1359  |
|             |         |          |     |                      |          |           | 1999-2001 | 150   |
|             |         |          |     |                      |          |           | 2005-2006 | 311   |
| CAM00071722 | 46°18'N | 76° 0'W  | 189 | MANIWAKI UA          | Canada   | 1954/2016 | 1954-1971 | 11712 |
|             |         |          |     |                      |          |           | 1977-2016 | 28509 |
| CAM00071801 | 47°40'N | 52°45'W  | 140 | SAINT JOHN'S ARPT    | Canada   | 1950/2009 | 1950-1952 | 2928  |
|             |         |          |     |                      |          |           | 1971-1972 | 1054  |
|             |         |          |     |                      |          |           | 1977-2009 | 22875 |
| CAM00071802 | 47°31'N | 52°47'W  | 112 | ST JOHN'S WEST UA    | Canada   | 2009/2016 | 2009-2016 | 5424  |
| CAM00071811 | 50°13'N | 66°15'W  | 53  | SEPT-ILES UA         | Canada   | 1954/2016 | 1954-1971 | 11675 |

|             |         |          |      |                      |        |           |           |       |
|-------------|---------|----------|------|----------------------|--------|-----------|-----------|-------|
|             |         |          |      |                      |        |           | 1977-2016 | 28446 |
| CAM00071815 | 48°34'N | 58°34'W  | 57   | STEPHENVILLE UA      | Canada | 1946/2016 | 1946-1972 | 28709 |
|             |         |          |      |                      |        |           | 1977-1994 | 11995 |
|             |         |          |      |                      |        |           | 1997-2016 | 14022 |
| CAM00071816 | 53°18'N | 60°22'W  | 36   | GOOSE UA             | Canada | 1946/2016 | 1946-1959 | 16251 |
|             |         |          |      |                      |        |           | 1961-1971 | 9053  |
|             |         |          |      |                      |        |           | 1977-2016 | 28533 |
| CAM00071823 | 53°45'N | 73°41'W  | 302  | LA GRANDE IV UA      | Canada | 1985/2016 | 1985-2016 | 22327 |
| CAM00071836 | 51°16'N | 80°39'W  | 10   | MOOSONEE UA          | Canada | 1954/2016 | 1954-1971 | 11565 |
|             |         |          |      |                      |        |           | 1977-2016 | 27783 |
| CAM00071843 | 49°48'N | 97° 8'W  | 227  | WINNIPEG UA          | Canada | 2000/2016 | 2000-2000 | 29    |
|             |         |          |      |                      |        |           | 2002-2006 | 343   |
|             |         |          |      |                      |        |           | 2008-2011 | 136   |
|             |         |          |      |                      |        |           | 2016-2016 | 23    |
| CAM00071845 | 51°27'N | 90°12'W  | 386  | PICKLE LAKE UA       | Canada | 1992/2016 | 1992-2016 | 17537 |
| CAM00071853 | 49°47'N | 99°38'W  | 373  | SHILO                | Canada | 1968/2007 | 1968-1970 | 325   |
|             |         |          |      |                      |        |           | 1972-1972 | 43    |
|             |         |          |      |                      |        |           | 1977-2007 | 5215  |
| CAM00071866 | 52°10'N | 106°43'W | 504  | SASKATOON DIEFENBAKE | Canada | 1994/1998 | 1994-1998 | 2300  |
| CAM00071867 | 53°58'N | 101° 6'W | 274  | THE PAS UA           | Canada | 1954/2016 | 1954-1972 | 12288 |
|             |         |          |      |                      |        |           | 1977-2016 | 28599 |
| CAM00071876 | 52°46'N | 108°15'W | 548  | NORTH BATTLEFORD     | Canada | 1998/2002 | 1998-2002 | 2133  |
| CAM00071877 | 51° 7'N | 114° 1'W | 1084 | CALGARY INTL         | Canada | 1965/1995 | 1965-1965 | 40    |
|             |         |          |      |                      |        |           | 1967-1968 | 220   |
| CAM00071893 | 49°43'N | 124°54'W | 26   | COMOX A              | Canada | 2009/2010 | 2009-2010 | 104   |
| CAM00071896 | 53°53'N | 122°40'W | 691  | PRINCE GEORGE        | Canada | 1954/1998 | 1954-1972 | 12645 |
|             |         |          |      |                      |        |           | 1977-1998 | 14914 |
| CAM00071906 | 58° 7'N | 68°25'W  | 60   | KUUJJUAQ             | Canada | 1947/2016 | 1947-1950 | 2107  |
|             |         |          |      |                      |        |           | 1954-1972 | 12229 |
|             |         |          |      |                      |        |           | 1977-2016 | 27997 |
| CAM00071907 | 58°28'N | 78° 5'W  | 24   | INUKJUAQ UA          | Canada | 1950/2016 | 1950-1972 | 15651 |
|             |         |          |      |                      |        |           | 1977-2016 | 27999 |
| CAM00071908 | 53°54'N | 122°47'W | 601  | PRINCE GEORGE UA     | Canada | 2000/2016 | 2000-2016 | 12415 |
| CAM00071909 | 63°45'N | 68°33'W  | 22   | IQUALUIT UA          | Canada | 1946/2016 | 1946-1972 | 17482 |
|             |         |          |      |                      |        |           | 1977-2016 | 28242 |
| CAM00071913 | 58°44'N | 94° 4'W  | 29   | CHURCHILL A UA       | Canada | 1950/2016 | 1950-1972 | 15877 |
|             |         |          |      |                      |        |           | 1977-2016 | 27784 |
| CAM00071915 | 64°12'N | 83°22'W  | 57   | CORAL HARBOUR UA     | Canada | 1950/2016 | 1950-1971 | 14892 |
|             |         |          |      |                      |        |           | 1977-2016 | 27058 |
| CAM00071917 | 79°59'N | 85°56'W  | 10   | EUREKA UA            | Canada | 1948/2016 | 1948-2016 | 49927 |
| CAM00071924 | 74°42'N | 94°58'W  | 46   | RESOLUTE UA          | Canada | 1948/2016 | 1948-2016 | 50571 |
| CAM00071925 | 69° 8'N | 105° 4'W | 25   | CAMBRIDGE BAY UA     | Canada | 1962/2016 | 1970-2016 | 34061 |
| CAM00071926 | 64°19'N | 96° 0'W  | 51   | BAKER LAKE UA        | Canada | 1949/2016 | 1949-1949 | 25    |
|             |         |          |      |                      |        |           | 1954-1972 | 12153 |
|             |         |          |      |                      |        |           | 1977-2016 | 26863 |
| CAM00071928 | 52°26'N | 114°55'W | 989  | ROCKY MTN HOUSE      | Canada | 1969/1980 | 1969-1971 | 467   |
|             |         |          |      |                      |        |           | 1977-1980 | 575   |
| CAM00071934 | 60° 2'N | 111°56'W | 204  | FORT SMITH UA        | Canada | 1954/2016 | 1954-1971 | 11696 |
|             |         |          |      |                      |        |           | 1977-2016 | 28350 |
| CAM00071938 | 67°49'N | 115° 5'W | 7    | COPPERMINE           | Canada | 1932/1970 | 1948-1970 | 13734 |

|             |         |          |      |                  |                              |           |           |       |
|-------------|---------|----------|------|------------------|------------------------------|-----------|-----------|-------|
| CAM00071945 | 58°50'N | 122°36'W | 378  | FORT NELSON UA   | Canada                       | 1954/2016 | 1954-1972 | 12300 |
|             |         |          |      |                  |                              |           | 1977-2016 | 28296 |
| CAM00071957 | 68°19'N | 133°31'W | 103  | INUVIK UA        | Canada                       | 1960/2016 | 1960-2016 | 41050 |
| CAM00071964 | 60°44'N | 135° 6'W | 707  | WHITEHORSE UA    | Canada                       | 1954/2016 | 1954-1971 | 11871 |
|             |         |          |      |                  |                              |           | 1977-2016 | 27895 |
| CAM00072807 | 47°18'N | 54° 0'W  | 14   | ARGENTIA         | Canada                       | 1946/1970 | 1946-1946 | 167   |
|             |         |          |      |                  |                              |           | 1950-1950 | 240   |
|             |         |          |      |                  |                              |           | 1952-1970 | 10697 |
| CAM00072826 | 53°12'N | 70°54'W  | 537  | NITCHEQUON       | Canada                       | 1954/1972 | 1954-1972 | 12040 |
| CAM00072848 | 53°50'N | 89°52'W  | 225  | TROUT LAKE       | Canada                       | 1954/1972 | 1954-1972 | 12369 |
| CAM00072918 | 73° 0'N | 85°18'W  | 0    | ARCTIC BAY (NWT) | Canada                       | 1942/1957 | 1948-1948 | 396   |
|             |         |          |      |                  |                              |           | 1950-1957 | 5172  |
| CAXUAC03491 | 50°17'N | 64°10'W  | 23   | MINGAN           | Canada                       | 1946/1949 | -         | 0     |
| CDM00064700 | 12° 8'N | 15° 2'E  | 295  | NDJAMENA         | Chad                         | 1950/2016 | 1957-1979 | 4323  |
|             |         |          |      |                  |                              |           | 1991-2010 | 4245  |
|             |         |          |      |                  |                              |           | 2012-2016 | 1438  |
| CDM00064750 | 9° 9'N  | 18°23'E  | 365  | SARH             | Chad                         | 1961/2016 | 1999-1999 | 1     |
|             |         |          |      |                  |                              |           | 2004-2005 | 10    |
|             |         |          |      |                  |                              |           | 2007-2010 | 42    |
|             |         |          |      |                  |                              |           | 2014-2014 | 1     |
|             |         |          |      |                  |                              |           | 2016-2016 | 22    |
| CEM00043466 | 6°54'N  | 79°52'E  | 7    | COLOMBO          | Sri Lanka                    | 1939/2016 | 1955-1957 | 263   |
|             |         |          |      |                  |                              |           | 1960-1962 | 326   |
|             |         |          |      |                  |                              |           | 1968-1989 | 1636  |
|             |         |          |      |                  |                              |           | 1993-2005 | 1152  |
|             |         |          |      |                  |                              |           | 2008-2016 | 1289  |
| CFM00064400 | 4°49'S  | 11°54'E  | 17   | POINTE-NOIRE     | Republic of the Congo        | 1947/2016 | 1999-2001 | 181   |
|             |         |          |      |                  |                              |           | 2003-2003 | 80    |
|             |         |          |      |                  |                              |           | 2005-2016 | 2160  |
| CFM00064458 | 1°37'N  | 16° 3'E  | 352  | OUESSO           | Republic of the Congo        | 1963/2016 | 1999-2006 | 750   |
|             |         |          |      |                  |                              |           | 2008-2016 | 1760  |
| CGM00064210 | 4°23'S  | 15°26'E  | 313  | KINSHASA/NDJILI  | Democratic Rep. of the Congo | 1967/1990 | 1967-1967 | 38    |
| CGM00064220 | 4°22'S  | 15°15'E  | 445  | KINSHASA/BINZA   | Democratic Rep. of the Congo | 1980/1983 | 1980-1983 | 223   |
| CHM00050527 | 49°15'N | 119°42'E | 653  | HAILAR           | China                        | 1956/2016 | 1957-1957 | 39    |
|             |         |          |      |                  |                              |           | 1963-2016 | 36875 |
| CHM00050557 | 49°10'N | 125°14'E | 243  | NENJIANG         | China                        | 1956/2016 | 1957-1957 | 47    |
|             |         |          |      |                  |                              |           | 1963-2016 | 36278 |
| CHM00050745 | 47°23'N | 123°55'E | 148  | QIQIHAR          | China                        | 1973/2000 | 1979-2000 | 12770 |
| CHM00050774 | 47°43'N | 128°50'E | 265  | YICHUN           | China                        | 1973/2016 | 1973-2016 | 31595 |
| CHM00050834 | 46°30'N | 121°22'E | 427  | TE-PO-SU-K-MIAO  | China                        | 2000/2000 | 2000-2000 | 121   |
| CHM00050873 | 46°49'N | 130°20'E | 80   | CHIAMUSSU        | China                        | 1956/1961 | 1960-1961 | 895   |
| CHM00050953 | 45°56'N | 126°34'E | 118  | HARBIN           | China                        | 1958/2016 | 1958-2016 | 39912 |
| CHM00051076 | 47°44'N | 88° 5'E  | 737  | ALTAY            | China                        | 1958/2016 | 1958-2016 | 39574 |
| CHM00051133 | 46°44'N | 83° 0'E  | 549  | TACHENG          | China                        | 1964/2002 | 1964-1964 | 86    |
|             |         |          |      |                  |                              |           | 1966-2002 | 21522 |
| CHM00051243 | 45°36'N | 84°51'E  | 428  | KARAMAY          | China                        | 1973/2002 | 1973-2002 | 19419 |
| CHM00051288 | 45°22'N | 90°32'E  | 1651 | BAYTIK SHAN      | China                        | 1959/2002 | 1959-1963 | 1634  |
|             |         |          |      |                  |                              |           | 1972-2002 | 16250 |
| CHM00051431 | 43°57'N | 81°20'E  | 664  | YINING           | China                        | 1956/2016 | 1956-2016 | 38806 |
| CHM00051463 | 43°47'N | 87°37'E  | 919  | WU LU MU QI      | China                        | 1956/2016 | 1956-2016 | 41326 |

|             |         |          |      |                     |       |           |           |       |
|-------------|---------|----------|------|---------------------|-------|-----------|-----------|-------|
| CHM00051628 | 41°16'N | 80°18'E  | 1286 | WEN-SU              | China | 1959/1961 | 1959-1961 | 678   |
| CHM00051644 | 41°43'N | 82°57'E  | 1084 | KUQA                | China | 1957/2016 | 1957-2016 | 40327 |
| CHM00051656 | 41°45'N | 86° 8'E  | 933  | KORLA               | China | 1964/2002 | 1964-1964 | 90    |
|             |         |          |      |                     |       |           | 1966-2002 | 21113 |
| CHM00051709 | 39°29'N | 75°45'E  | 1387 | KASHI               | China | 1956/2016 | 1957-2016 | 40379 |
| CHM00051777 | 39° 2'N | 88°10'E  | 889  | RUOQIANG            | China | 1956/2016 | 1956-2016 | 40762 |
| CHM00051828 | 37° 8'N | 79°56'E  | 1375 | HOTAN               | China | 1957/2016 | 1957-2016 | 40151 |
| CHM00051839 | 37° 4'N | 82°43'E  | 1409 | MINFENG             | China | 1973/2016 | 1973-1973 | 2     |
|             |         |          |      |                     |       |           | 1999-2016 | 13019 |
| CHM00051848 | 37°56'N | 83°39'E  | 1264 | ANDIR               | China | 1997/1998 | 1997-1998 | 725   |
| CHM00051886 | 38°15'N | 90°51'E  | 3139 | MANGNAI             | China | 1973/2002 | 1973-2002 | 14432 |
| CHM00051895 | 37°51'N | 91°39'E  | 3060 | MANGYA              | China | 1957/1961 | 1957-1961 | 1062  |
| CHM00052203 | 42°49'N | 93°31'E  | 739  | HAMI                | China | 1957/2016 | 1957-1967 | 3670  |
|             |         |          |      |                     |       |           | 1969-2016 | 33946 |
| CHM00052267 | 41°57'N | 101° 4'E | 941  | EJIN QI             | China | 1957/2016 | 1957-1963 | 2329  |
|             |         |          |      |                     |       |           | 1973-2016 | 31822 |
| CHM00052313 | 41°47'N | 95° 8'E  | 1935 | XING-XING-XIA       | China | 1959/1959 | 1959-1959 | 122   |
| CHM00052323 | 41°48'N | 97° 2'E  | 1770 | MAZONG SHAN         | China | 1963/2016 | 1963-1964 | 234   |
|             |         |          |      |                     |       |           | 1966-2016 | 35266 |
| CHM00052391 | 41°45'N | 103°58'E | 1463 | PANG-TING-TO-TO-KAI | China | 1963/1970 | 1963-1964 | 196   |
|             |         |          |      |                     |       |           | 1966-1970 | 861   |
| CHM00052418 | 40° 9'N | 94°41'E  | 1140 | DUNHUANG            | China | 1957/2016 | 1957-2016 | 39906 |
| CHM00052495 | 40°45'N | 104°30'E | 1329 | BAYAN MOD           | China | 1971/2002 | 1971-2002 | 20063 |
| CHM00052533 | 39°46'N | 98°29'E  | 1478 | JIUQUAN             | China | 1956/2016 | 1956-2016 | 40583 |
| CHM00052602 | 38°50'N | 93°23'E  | 2771 | LENGHU              | China | 1959/1993 | 1959-1964 | 1419  |
|             |         |          |      |                     |       |           | 1966-1967 | 177   |
|             |         |          |      |                     |       |           | 1973-1993 | 13642 |
| CHM00052681 | 38°38'N | 103° 5'E | 1367 | MINQIN              | China | 1957/2016 | 1957-2016 | 39738 |
| CHM00052818 | 36°25'N | 94°54'E  | 2809 | GOLMUD              | China | 1957/2016 | 1957-1964 | 3736  |
|             |         |          |      |                     |       |           | 1966-2016 | 35356 |
| CHM00052836 | 36°18'N | 98° 6'E  | 3190 | DOULAN              | China | 1956/2016 | 1956-1963 | 3475  |
|             |         |          |      |                     |       |           | 1966-1971 | 2915  |
|             |         |          |      |                     |       |           | 1973-2016 | 30922 |
| CHM00052866 | 36°43'N | 101°45'E | 2296 | XINING              | China | 1958/2016 | 1958-1964 | 3027  |
|             |         |          |      |                     |       |           | 1966-2016 | 35503 |
| CHM00052889 | 36° 3'N | 103°53'E | 1518 | LANZHOU             | China | 1956/2001 | 1956-2001 | 29384 |
| CHM00052983 | 35°52'N | 104° 9'E | 1875 | YU ZHONG            | China | 2001/2016 | 2001-2016 | 11254 |
| CHM00053068 | 43°38'N | 111°57'E | 966  | ERENHOT             | China | 1973/2016 | 1973-2016 | 31728 |
| CHM00053276 | 42°24'N | 112°54'E | 1152 | JURH                | China | 1956/1988 | 1956-1958 | 632   |
| CHM00053336 | 41°34'N | 108°31'E | 1290 | HALIUT              | China | 1973/2016 | 1973-2002 | 19685 |
|             |         |          |      |                     |       |           | 2015-2016 | 781   |
| CHM00053420 | 40°58'N | 107°10'E | 1057 | XAMBA               | China | 1956/1958 | 1956-1958 | 1085  |
| CHM00053463 | 40°51'N | 111°34'E | 1154 | HOHHOT              | China | 1956/2016 | 1956-2016 | 42013 |
| CHM00053513 | 40°44'N | 107°22'E | 1041 | LINHE               | China | 1973/2016 | 1973-2016 | 31625 |
| CHM00053543 | 39°50'N | 109°59'E | 1459 | DONGSHENG           | China | 1963/2016 | 1963-1963 | 262   |
|             |         |          |      |                     |       |           | 1972-2002 | 19885 |
|             |         |          |      |                     |       |           | 2015-2016 | 780   |
| CHM00053546 | 39°17'N | 109°45'E | 1310 | CHASAKOCHI          | China | 1957/1962 | 1957-1962 | 3462  |
| CHM00053614 | 38°28'N | 106°12'E | 1112 | YINCHUAN            | China | 1957/2016 | 1957-2016 | 40781 |
| CHM00053772 | 37°37'N | 112°35'E | 776  | TAIYUAN             | China | 1956/2016 | 1956-2016 | 41572 |

|             |         |          |      |                 |       |           |           |       |
|-------------|---------|----------|------|-----------------|-------|-----------|-----------|-------|
| CHM00053798 | 37°11'N | 114°22'E | 184  | XINGTAI         | China | 1967/2016 | 1967-2002 | 21213 |
|             |         |          |      |                 |       |           | 2015-2016 | 781   |
| CHM00053845 | 36°34'N | 109°27'E | 959  | YAN AN          | China | 1956/2016 | 1956-2016 | 40102 |
| CHM00053915 | 35°33'N | 106°40'E | 1348 | PINGLIANG       | China | 1959/2016 | 1959-1964 | 1929  |
|             |         |          |      |                 |       |           | 1966-2016 | 34557 |
| CHM00054102 | 43°57'N | 116° 7'E | 1004 | XILIN HOT       | China | 1956/2016 | 1956-2016 | 40616 |
| CHM00054135 | 43°36'N | 122°16'E | 180  | TONGLIAO        | China | 1959/2016 | 1959-2016 | 38274 |
| CHM00054161 | 43°54'N | 125°13'E | 238  | CHANGCHUN       | China | 1956/2016 | 1956-2016 | 41361 |
| CHM00054218 | 42°18'N | 118°50'E | 669  | CHIFENG         | China | 1956/2016 | 1956-2016 | 39937 |
| CHM00054292 | 42°52'N | 129°30'E | 258  | YANJI           | China | 1956/2016 | 1956-2016 | 40031 |
| CHM00054337 | 41° 7'N | 121° 4'E | 30   | JINZHOU         | China | 1960/2007 | 1960-2002 | 21651 |
|             |         |          |      |                 |       |           | 2004-2007 | 1912  |
| CHM00054339 | 41° 7'N | 122°57'E | 122  | AN SHAN         | China | 1960/1961 | 1960-1961 | 362   |
| CHM00054342 | 41°44'N | 123°31'E | 49   | SHENYANG        | China | 1956/2016 | 1956-2016 | 41921 |
| CHM00054374 | 41°48'N | 126°53'E | 385  | LINJIANG        | China | 1959/2016 | 1959-2016 | 38289 |
| CHM00054401 | 40°47'N | 114°53'E | 774  | ZHANGJIAKOU     | China | 1973/2016 | 1973-2002 | 19450 |
|             |         |          |      |                 |       |           | 2015-2016 | 781   |
| CHM00054497 | 40° 5'N | 124°20'E | 13   | DANDONG         | China | 1960/2007 | 1960-2002 | 21208 |
|             |         |          |      |                 |       |           | 2004-2007 | 1937  |
| CHM00054511 | 39°56'N | 116°17'E | 33   | BEIJING         | China | 1956/2016 | 1956-2016 | 42217 |
| CHM00054534 | 39°40'N | 118° 7'E | 57   | TANG SHAN       | China | 1960/1961 | 1960-1961 | 251   |
| CHM00054662 | 38°54'N | 121°38'E | 97   | DALIAN          | China | 1944/2016 | 1956-2016 | 39156 |
| CHM00054714 | 37°29'N | 116°22'E | 23   | TE HSIEN/TECHOW | China | 1959/1961 | 1959-1961 | 497   |
| CHM00054727 | 36°42'N | 117°33'E | 123  | ZHANGQIU        | China | 2003/2016 | 2003-2016 | 9708  |
| CHM00054776 | 37°24'N | 122°41'E | 47   | CHENGSHANTOU    | China | 1973/2000 | 1979-2000 | 12637 |
| CHM00054823 | 36°41'N | 116°59'E | 58   | JINAN           | China | 1956/2003 | 1956-2003 | 31675 |
| CHM00054843 | 36°42'N | 119° 7'E | 38   | WEI HSIEN       | China | 1960/1961 | 1960-1961 | 254   |
| CHM00054857 | 36° 4'N | 120°20'E | 77   | QINGDAO         | China | 1956/2016 | 1956-2016 | 40829 |
| CHM00055299 | 31°29'N | 92° 4'E  | 4508 | NAGQU           | China | 1957/2016 | 1957-1963 | 2434  |
|             |         |          |      |                 |       |           | 1966-1971 | 1959  |
|             |         |          |      |                 |       |           | 1973-2016 | 30323 |
| CHM00055591 | 29°40'N | 91° 8'E  | 3650 | LHASA           | China | 1957/2016 | 1957-1963 | 3889  |
|             |         |          |      |                 |       |           | 1966-1971 | 2334  |
|             |         |          |      |                 |       |           | 1973-2016 | 30707 |
| CHM00055664 | 28°38'N | 87° 5'E  | 4302 | TINGRI          | China | 1973/2000 | 1973-1981 | 2333  |
|             |         |          |      |                 |       |           | 1983-1991 | 878   |
|             |         |          |      |                 |       |           | 1993-2000 | 650   |
| CHM00056004 | 33°57'N | 92°37'E  | 4535 | TUOTUOHE        | China | 1973/1999 | 1973-1999 | 10266 |
| CHM00056029 | 33° 0'N | 96°57'E  | 3717 | YUSHU           | China | 1959/2016 | 1959-1963 | 1169  |
|             |         |          |      |                 |       |           | 1969-1971 | 1023  |
|             |         |          |      |                 |       |           | 1973-2016 | 31325 |
| CHM00056046 | 33°48'N | 99°48'E  | 3968 | DARLAG          | China | 1967/1999 | 1967-1967 | 73    |
|             |         |          |      |                 |       |           | 1973-1999 | 11723 |
| CHM00056080 | 35° 0'N | 102°54'E | 2910 | HEZUO           | China | 1960/2016 | 1960-1964 | 1414  |
|             |         |          |      |                 |       |           | 1967-2016 | 33686 |
| CHM00056096 | 33°23'N | 104°55'E | 1079 | WUDU            | China | 1957/2002 | 1957-2002 | 27060 |
| CHM00056137 | 31° 9'N | 97°10'E  | 3307 | QAMDO           | China | 1957/2016 | 1957-1963 | 3771  |
|             |         |          |      |                 |       |           | 1966-1971 | 877   |
|             |         |          |      |                 |       |           | 1973-2016 | 29394 |
| CHM00056146 | 31°37'N | 100° 0'E | 3394 | GARZE           | China | 1957/2016 | 1957-1963 | 2716  |

|             |         |          |      |                |       |           |           |       |
|-------------|---------|----------|------|----------------|-------|-----------|-----------|-------|
|             |         |          |      |                |       |           | 1966-1971 | 1996  |
|             |         |          |      |                |       |           | 1973-2016 | 31024 |
| CHM00056172 | 31°54'N | 102°14'E | 2666 | BARKAM         | China | 1960/1987 | 1960-1961 | 301   |
|             |         |          |      |                |       |           | 1973-1974 | 3     |
| CHM00056187 | 30°45'N | 103°52'E | 549  | WENJIANG       | China | 2004/2016 | 2004-2016 | 8873  |
| CHM00056247 | 29°58'N | 99° 4'E  | 2589 | BATANG         | China | 1972/2002 | 1972-2002 | 19145 |
| CHM00056294 | 30°40'N | 104° 1'E | 508  | CHENGDU        | China | 1956/2004 | 1956-2004 | 32955 |
| CHM00056312 | 29°34'N | 94°28'E  | 3001 | NYINGCHI       | China | 1973/2000 | 1984-2000 | 4104  |
| CHM00056444 | 28°27'N | 98°53'E  | 3320 | DEQEN          | China | 1967/1988 | 1967-1967 | 118   |
|             |         |          |      |                |       |           | 1973-1981 | 4253  |
|             |         |          |      |                |       |           | 1983-1988 | 1689  |
| CHM00056492 | 28°49'N | 104°32'E | 342  | YIBIN          | China | 1957/2002 | 1957-2002 | 27491 |
| CHM00056533 | 27°40'N | 98°23'E  | 2051 | LA WANG/TZUKEI | China | 1959/1961 | 1959-1961 | 854   |
| CHM00056571 | 27°54'N | 102°16'E | 1599 | XICHANG        | China | 1956/2016 | 1956-2016 | 38149 |
| CHM00056651 | 26°52'N | 100°14'E | 2394 | LIJING         | China | 1964/2002 | 1964-1964 | 31    |
|             |         |          |      |                |       |           | 1966-1969 | 213   |
|             |         |          |      |                |       |           | 1972-2002 | 19420 |
| CHM00056691 | 26°52'N | 104°17'E | 2236 | WEINING        | China | 1960/2016 | 1960-1964 | 2289  |
|             |         |          |      |                |       |           | 1966-2016 | 34579 |
| CHM00056739 | 24°59'N | 98°30'E  | 1697 | TENGCHONG      | China | 1956/2016 | 1956-1964 | 4299  |
|             |         |          |      |                |       |           | 1966-2016 | 35258 |
| CHM00056778 | 25° 1'N | 102°41'E | 1892 | KUNMING        | China | 1956/2016 | 1956-1964 | 3766  |
|             |         |          |      |                |       |           | 1966-2016 | 34943 |
| CHM00056779 | 25° 1'N | 102°50'E | 1982 | KAN-HAI-TZU    | China | 1960/1961 | 1960-1961 | 598   |
| CHM00056964 | 22°46'N | 100°59'E | 1303 | SIMAO          | China | 1957/2016 | 1957-2016 | 39490 |
| CHM00056985 | 23°23'N | 103°23'E | 1302 | MENGZI         | China | 1973/2016 | 1973-1973 | 4     |
|             |         |          |      |                |       |           | 1979-2016 | 27209 |
| CHM00056989 | 22°28'N | 103°57'E | 142  | HEKOU          | China | 1957/1972 | 1957-1972 | 9018  |
| CHM00057036 | 34°18'N | 108°56'E | 398  | XIAN           | China | 1956/2006 | 1956-2006 | 34474 |
| CHM00057083 | 34°43'N | 113°39'E | 111  | ZHENGZHOU      | China | 1956/2016 | 1956-2016 | 41956 |
| CHM00057127 | 33° 4'N | 107° 2'E | 509  | HANZHONG       | China | 1959/2016 | 1959-2016 | 39404 |
| CHM00057131 | 34°26'N | 108°58'E | 411  | JINGHE         | China | 2007/2016 | 2007-2016 | 6759  |
| CHM00057178 | 33° 6'N | 112°29'E | 182  | NANYANG        | China | 1967/2016 | 1967-2016 | 32801 |
| CHM00057245 | 32°26'N | 109° 1'E | 291  | ANKANG         | China | 1960/2002 | 1960-1967 | 2842  |
|             |         |          |      |                |       |           | 1969-2002 | 20608 |
| CHM00057290 | 32°58'N | 114° 3'E | 85   | ZHUMADIAN      | China | 1973/1996 | 1973-1996 | 6226  |
| CHM00057328 | 31°13'N | 107°30'E | 342  | DA XIAN        | China | 1960/2002 | 1960-1964 | 1243  |
|             |         |          |      |                |       |           | 1966-2002 | 21874 |
| CHM00057411 | 30°48'N | 106° 5'E | 310  | NANCHONG       | China | 1972/1983 | 1972-1983 | 8060  |
| CHM00057447 | 30°17'N | 109°28'E | 458  | ENSHI          | China | 1959/2016 | 1959-2016 | 39272 |
| CHM00057461 | 30°44'N | 111°22'E | 258  | YICHANG        | China | 1956/2016 | 1956-2016 | 41015 |
| CHM00057494 | 30°36'N | 114° 3'E | 24   | WUHAN          | China | 1946/2016 | 1956-2016 | 42321 |
| CHM00057516 | 29°36'N | 106°24'E | 541  | CHONGQING      | China | 1957/2016 | 1957-1972 | 8282  |
|             |         |          |      |                |       |           | 1980-2016 | 26670 |
| CHM00057633 | 28°50'N | 108°46'E | 665  | YOUYANG        | China | 1980/1981 | 1980-1980 | 5     |
| CHM00057679 | 28°12'N | 113° 5'E | 46   | CHANGSHA       | China | 1956/2016 | 1956-2016 | 41334 |
| CHM00057749 | 27°34'N | 110° 0'E | 261  | HUAIHUA        | China | 1956/2016 | 1956-2016 | 41566 |
| CHM00057816 | 26°29'N | 106°39'E | 1223 | GUIYANG        | China | 1956/2016 | 1956-2016 | 40804 |
| CHM00057916 | 25°26'N | 106°46'E | 441  | LUODIAN        | China | 1973/1987 | 1973-1973 | 11    |
|             |         |          |      |                |       |           | 1979-1984 | 74    |

|             |         |          |     |                    |       |           |           |       |
|-------------|---------|----------|-----|--------------------|-------|-----------|-----------|-------|
| CHM00057957 | 25°20'N | 110°18'E | 166 | GUILIN             | China | 1957/2016 | 1957-2016 | 40610 |
| CHM00057972 | 25°48'N | 113° 2'E | 185 | CHENZHOU           | China | 1956/2016 | 1956-2016 | 40039 |
| CHM00057993 | 25°52'N | 115° 0'E | 134 | GANZHOU            | China | 1956/2016 | 1956-2016 | 41664 |
| CHM00058027 | 34°17'N | 117° 9'E | 42  | XUZHOU             | China | 1956/2016 | 1956-2016 | 40959 |
| CHM00058150 | 33°45'N | 120°18'E | 3   | SHEYANG            | China | 1964/2016 | 1964-1967 | 951   |
|             |         |          |     |                    |       |           | 1969-2016 | 32782 |
| CHM00058203 | 32°52'N | 115°44'E | 33  | FUYANG             | China | 1957/2016 | 1957-2016 | 39826 |
| CHM00058238 | 31°56'N | 118°54'E | 32  | NANJING            | China | 1930/2016 | 1956-2016 | 41652 |
| CHM00058321 | 31°52'N | 117°14'E | 36  | HEFEI              | China | 1960/1987 | 1960-1965 | 1633  |
| CHM00058362 | 31°25'N | 121°27'E | 9   | SHANGHAI (BAOSHAN) | China | 1956/2016 | 1956-2016 | 41932 |
| CHM00058424 | 30°37'N | 116°58'E | 62  | ANQING             | China | 1960/2016 | 1960-1961 | 146   |
|             |         |          |     |                    |       |           | 1966-1967 | 233   |
|             |         |          |     |                    |       |           | 1969-2016 | 32423 |
| CHM00058457 | 30°14'N | 120°10'E | 43  | HANGZHOU           | China | 1960/2016 | 1960-2016 | 35478 |
| CHM00058606 | 28°36'N | 115°55'E | 50  | NANCHANG           | China | 1957/2016 | 1957-2016 | 40755 |
| CHM00058633 | 28°58'N | 118°52'E | 83  | QU XIAN            | China | 1956/2016 | 1956-2016 | 40984 |
| CHM00058665 | 28°37'N | 121°25'E | 2   | HONGJIA            | China | 1991/2016 | 1991-2016 | 18386 |
| CHM00058666 | 28°27'N | 121°53'E | 84  | DACHEN DAO         | China | 1958/1991 | 1958-1991 | 18563 |
| CHM00058725 | 27°20'N | 117°28'E | 219 | SHAOWU             | China | 1958/2016 | 1958-1963 | 1606  |
|             |         |          |     |                    |       |           | 1973-2016 | 31708 |
| CHM00058847 | 26° 5'N | 119°17'E | 85  | FUZHOU             | China | 1956/2016 | 1956-2016 | 40197 |
| CHM00059023 | 24°42'N | 108° 2'E | 261 | HECHI              | China | 1973/2016 | 1973-2002 | 19401 |
|             |         |          |     |                    |       |           | 2015-2016 | 781   |
| CHM00059082 | 24°50'N | 113°30'E | 87  | CHU CHIANG         | China | 1958/1961 | 1958-1961 | 1390  |
| CHM00059096 | 24°22'N | 114°29'E | 214 | LIANPING           | China | 1967/2002 | 1967-2002 | 20249 |
| CHM00059134 | 24°29'N | 118° 5'E | 139 | XIAMEN             | China | 1958/2016 | 1958-2016 | 39068 |
| CHM00059137 | 24°18'N | 118° 5'E | 12  | CHIANGYANG         | China | 1960/1960 | 1960-1960 | 188   |
| CHM00059211 | 23°54'N | 106°36'E | 177 | BAISE              | China | 1957/2016 | 1957-2016 | 39801 |
| CHM00059265 | 23°29'N | 111°18'E | 120 | WUZHOU             | China | 1957/2016 | 1957-2016 | 39384 |
| CHM00059280 | 23°42'N | 113° 5'E | 78  | QINGYUAN           | China | 1997/2016 | 1997-2016 | 14639 |
| CHM00059287 | 23°13'N | 113°29'E | 71  | GUANGZHOU          | China | 1956/1995 | 1956-1995 | 26047 |
| CHM00059316 | 23°21'N | 116°40'E | 4   | SHANTOU            | China | 1957/2016 | 1957-2016 | 41150 |
| CHM00059431 | 22°38'N | 108°13'E | 126 | NANNING            | China | 1956/2016 | 1956-2016 | 41219 |
| CHM00059644 | 21°29'N | 109° 6'E | 16  | BEIHAI             | China | 1973/2015 | 1990-2000 | 5300  |
|             |         |          |     |                    |       |           | 2014-2015 | 1116  |
| CHM00059663 | 21°50'N | 111°58'E | 91  | YANGJIANG          | China | 1966/2016 | 1966-2002 | 20347 |
|             |         |          |     |                    |       |           | 2014-2016 | 1954  |
| CHM00059758 | 20° 0'N | 110°15'E | 64  | HAIKOU             | China | 1956/2016 | 1956-2016 | 41238 |
| CHM00059948 | 18°13'N | 109°35'E | 420 | SANYA              | China | 1973/2016 | 1973-2002 | 17328 |
|             |         |          |     |                    |       |           | 2014-2016 | 1951  |
| CHXUAC03995 | 46°13'N | 122° 3'E | 274 | ULANHOT            | China | 1957/1960 | -         | 0     |
| CIM00085442 | 23°27'S | 70°26'W  | 113 | ANTOFAGASTA        | Chile | 1957/2016 | 1961-1972 | 6333  |
|             |         |          |     |                    |       |           | 1990-1993 | 1218  |
|             |         |          |     |                    |       |           | 1998-2016 | 6665  |
| CIM00085469 | 27°10'S | 109°26'W | 172 | ISLA DE PASCUA     | Chile | 1966/2016 | 1966-1966 | 217   |
|             |         |          |     |                    |       |           | 1969-2016 | 12890 |
| CIM00085543 | 32°47'S | 71°31'W  | 8   | QUINTERO (MIL)     | Chile | 1957/1999 | 1957-1988 | 21318 |
|             |         |          |     |                    |       |           | 1990-1993 | 2564  |
|             |         |          |     |                    |       |           | 1998-1999 | 1119  |
| CIM00085586 | 33°39'S | 71°37'W  | 73  | SANTO DOMINGO      | Chile | 1999/2016 | 1999-2016 | 10882 |

[illegible]



|             |         |         |      |                            |                    |           |           |       |
|-------------|---------|---------|------|----------------------------|--------------------|-----------|-----------|-------|
|             |         |         |      |                            |                    |           | 2009-2016 | 2457  |
| CYM00017601 | 34°35'N | 32°59'E | 23   | AKROTIRI                   | Cyprus             | 1976/2001 | 1976-1981 | 1839  |
|             |         |         |      |                            |                    |           | 1992-1996 | 63    |
| CYM00017603 | 34°47'N | 32°31'E | 116  | EPISKOPI                   | Cyprus             | 1970/1970 | 1970-1970 | 405   |
| CYM00017607 | 35° 8'N | 33°24'E | 162  | ATHALASSA                  | Cyprus             | 1949/2016 | 1949-1969 | 10082 |
|             |         |         |      |                            |                    |           | 1981-2016 | 15534 |
| DAM00006030 | 57° 6'N | 9°52'E  | 3    | FLYVESTATION AALBOR        | Denmark            | 1967/1992 | 1967-1978 | 1993  |
|             |         |         |      |                            |                    |           | 1980-1992 | 2774  |
| DAM00006060 | 56°18'N | 9° 7'E  | 52   | FLYVESTATION KARUP         | Denmark            | 1999/2016 | 1999-2016 | 4683  |
| DAM00006180 | 55°38'N | 12°40'E | 5    | KOBENHAVN/KASTRUP          | Denmark            | 1949/1962 | 1949-1962 | 8549  |
| DAM00006181 | 55°46'N | 12°32'E | 40   | JAEGERSBORG                | Denmark            | 1962/2006 | 1962-2006 | 30690 |
| DRM00078467 | 19° 3'N | 69°23'W | 11   | SABANA DE LA MAR           | Dominican Republic | 1956/1962 | 1956-1962 | 4057  |
| DRM00078486 | 18°26'N | 69°53'W | 14   | SANTO DOMINGO              | Dominican Republic | 1962/2016 | 1962-2016 | 22944 |
| ECM00084008 | 0°54'S  | 89°36'W | 8    | SAN CRISTOBAL RADIOSONDA   | Ecuador            | 1967/2016 | 1967-1971 | 359   |
|             |         |         |      |                            |                    |           | 1974-1974 | 42    |
|             |         |         |      |                            |                    |           | 1991-1993 | 939   |
|             |         |         |      |                            |                    |           | 2002-2003 | 33    |
|             |         |         |      |                            |                    |           | 2005-2016 | 2011  |
| ECM00084111 | 2°12'S  | 81° 0'W | 8    | CHINCHIPE                  | Ecuador            | 1943/1945 | 1943-1945 | 601   |
| ECM00084203 | 2° 9'S  | 79°53'W | 6    | GUAYAQUIL AEROPUERTO       | Ecuador            | 1957/2016 | 1957-1960 | 1652  |
|             |         |         |      |                            |                    |           | 1968-1971 | 585   |
|             |         |         |      |                            |                    |           | 1978-1979 | 259   |
|             |         |         |      |                            |                    |           | 2013-2016 | 1191  |
| EGM00062306 | 31°20'N | 27°13'E | 29   | MERSA MATRUH               | Egypt              | 1934/2016 | 1955-1988 | 13907 |
|             |         |         |      |                            |                    |           | 1990-2016 | 12212 |
| EGM00062337 | 31° 4'N | 33°50'E | 37   | EL ARISH                   | Egypt              | 1950/2016 | 1995-2016 | 8568  |
| EGM00062366 | 30° 8'N | 31°34'E | 74   | CAIRO                      | Egypt              | 1933/1960 | 1946-1946 | 176   |
|             |         |         |      |                            |                    |           | 1949-1960 | 3962  |
| EGM00062378 | 29°52'N | 31°21'E | 139  | HELWAN                     | Egypt              | 1920/2016 | 1960-2016 | 25638 |
| EGM00062403 | 26°12'N | 32°45'E | 96   | SOUTH OF VALLEY UNIVERSITY | Egypt              | 2003/2014 | 2003-2014 | 4197  |
| EGM00062414 | 23°58'N | 32°49'E | 202  | ASSWAN                     | Egypt              | 1936/2016 | 1956-2016 | 23390 |
| EGM00062423 | 27° 3'N | 27°59'E | 82   | FARAFRA                    | Egypt              | 1953/2016 | 2003-2016 | 4374  |
| EIM0003953  | 51°56'N | 10°15'W | 24   | VALENTIA OBSERVATORY       | Ireland            | 1949/2016 | 1949-2016 | 54434 |
| ENM00026038 | 59°24'N | 24°36'E | 33   | TALLINN-HARKU              | Estonia            | 1947/2016 | 1947-2016 | 48013 |
| ERM00063021 | 15°17'N | 38°55'E | 2325 | ASMARA                     | Eritrea            | 1977/1991 | 1977-1991 | 1459  |
| ETM00063450 | 9° 2'N  | 38°45'E | 2354 | ADDIS ABABA-BOLE           | Ethiopia           | 1958/2016 | 1958-1959 | 220   |
|             |         |         |      |                            |                    |           | 1962-1962 | 255   |
|             |         |         |      |                            |                    |           | 1966-1966 | 38    |
|             |         |         |      |                            |                    |           | 1974-2000 | 5458  |
|             |         |         |      |                            |                    |           | 2002-2004 | 205   |
|             |         |         |      |                            |                    |           | 2006-2016 | 1852  |
| ETM00063478 | 5°54'N  | 43°35'E | 295  | GODE                       | Ethiopia           | 1977/1988 | 1977-1977 | 46    |
|             |         |         |      |                            |                    |           | 1986-1988 | 191   |
| EZM00011518 | 50° 6'N | 14°17'E | 374  | PRAHA/RUZYNE               | Czech Republic     | 1949/1967 | 1949-1953 | 1287  |
|             |         |         |      |                            |                    |           | 1955-1967 | 7426  |
| EZM00011520 | 50° 0'N | 14°27'E | 302  | PRAHA-LIBUS                | Czech Republic     | 1969/2016 | 1969-2016 | 62079 |
| EZM00011722 | 49° 5'N | 16°37'E | 195  | BRNO REBESOVICE            | Czech Republic     | 2000/2003 | 2000-2003 | 3197  |
| EZM00011747 | 49°27'N | 17° 8'E | 215  | PROSTEJOV                  | Czech Republic     | 2003/2016 | 2003-2016 | 8578  |
| FGM00081405 | 4°49'N  | 52°22'W | 8    | CAYENNE MATOURY            | French Guiana      | 1953/2016 | 1953-1955 | 335   |
|             |         |         |      |                            |                    |           | 1965-1967 | 199   |

|             |         |          |     |                              |                                |           |           |       |
|-------------|---------|----------|-----|------------------------------|--------------------------------|-----------|-----------|-------|
|             |         |          |     |                              |                                |           | 1969-1975 | 703   |
|             |         |          |     |                              |                                |           | 1979-2016 | 18784 |
| FIM00002836 | 67°22'N | 26°38'E  | 179 | SODANKYLA ARCTIC RES. CENTER | Finland                        | 1920/2016 | 1950-2016 | 49119 |
| FIM00002935 | 62°24'N | 25°40'E  | 139 | JYVASKYLA AIRPORT            | Finland                        | 1957/2016 | 1957-2016 | 43409 |
| FIM00002963 | 60°49'N | 23°30'E  | 104 | JOKIOINEN OBSERVATORY        | Finland                        | 1957/2016 | 1957-2016 | 45756 |
| FIM00002974 | 60°19'N | 24°58'E  | 58  | HELSINKI/SEUTALA             | Finland                        | 1949/1956 | 1949-1956 | 4540  |
| FIXUAC00035 | 60°12'N | 24°55'E  | 47  | HELSINKI                     | Finland                        | 1919/1942 | -         | 0     |
| FJM00091680 | 17°45'S | 177°27'E | 13  | NADI AIRPORT                 | Fiji                           | 1949/2016 | 1949-1953 | 1285  |
|             |         |          |     |                              |                                |           | 1957-1959 | 906   |
|             |         |          |     |                              |                                |           | 1966-2016 | 18719 |
| FKM00088889 | 51°49'S | 58°27'W  | 74  | MOUNT PLEASANT AIRPORT       | Falkland Isls.(Islas Malvinas) | 1990/2016 | 1990-2016 | 20544 |
| FKM00088890 | 51°42'S | 57°52'W  | 51  | STANLEY                      | Falkland Isls.(Islas Malvinas) | 1948/1962 | 1948-1962 | 4603  |
| FMM00091317 | 7°23'N  | 143°55'E | 4   | WOLEAI ATOLL                 | Federated States of Micronesia | 1979/1979 | 1979-1979 | 106   |
| FMM00091334 | 7°27'N  | 151°50'E | 3   | TRUK/CAROLINE IS.            | Federated States of Micronesia | 1951/2016 | 1951-2016 | 37665 |
| FMM00091348 | 6°57'N  | 158°12'E | 38  | PONAPE/CAROLINE IS.          | Federated States of Micronesia | 1950/2016 | 1950-2016 | 38438 |
| FMM00091356 | 5°20'N  | 163° 1'E | 4   | KUSAIE/CAROLINES             | Federated States of Micronesia | 1951/1958 | 1951-1952 | 234   |
|             |         |          |     |                              |                                |           | 1954-1954 | 390   |
|             |         |          |     |                              |                                |           | 1956-1956 | 519   |
|             |         |          |     |                              |                                |           | 1958-1958 | 507   |
| FMM00091413 | 9°29'N  | 138° 4'E | 15  | YAP/CAROLINE IS.             | Federated States of Micronesia | 1949/2016 | 1949-2016 | 37017 |
| FMM00091434 | 1° 5'N  | 154°46'E | 3   | KAPINGAMARANGI ATOL          | Federated States of Micronesia | 1958/1979 | 1958-1958 | 412   |
|             |         |          |     |                              |                                |           | 1962-1962 | 32    |
|             |         |          |     |                              |                                |           | 1979-1979 | 43    |
| FOM00006011 | 62° 1'N | 6°46'W   | 54  | TORSHAVN                     | Faroe Islands                  | 1949/2016 | 1949-2016 | 47133 |
| FPM00091902 | 4° 3'S  | 154°59'W | 7   | MALDEN ISLAND AF             | French Polynesia               | 1962/1962 | 1962-1962 | 274   |
| FPM00091925 | 9°48'S  | 139° 2'W | 51  | HIVA-OA                      | French Polynesia               | 1968/2016 | 1968-2016 | 17621 |
| FPM00091938 | 17°33'S | 149°37'W | 2   | TAHITI-FAAA                  | French Polynesia               | 1957/2016 | 1957-1958 | 389   |
|             |         |          |     |                              |                                |           | 1966-2016 | 24938 |
| FPM00091943 | 14°29'S | 145° 2'W | 2   | TAKAROA ATOLL                | French Polynesia               | 1973/2009 | 2001-2001 | 10    |
|             |         |          |     |                              |                                |           | 2005-2009 | 1169  |
| FPM00091944 | 18° 4'S | 140°57'W | 3   | HAO                          | French Polynesia               | 1971/1997 | 1971-1997 | 8791  |
| FPM00091946 | 20°46'S | 138°33'W | 2   | TUREIA                       | French Polynesia               | 1970/1971 | 1970-1971 | 271   |
| FPM00091948 | 23° 8'S | 134°58'W | 91  | MANGAREVA                    | French Polynesia               | 1970/2016 | 1970-1981 | 3015  |
|             |         |          |     |                              |                                |           | 1997-2016 | 8008  |
| FPM00091952 | 21°49'S | 138°48'W | 3   | MURUROA                      | French Polynesia               | 1974/1997 | 1988-1997 | 2849  |
| FPM00091954 | 23°21'S | 149°29'W | 2   | TUBUAI ISLAND                | French Polynesia               | 1973/2010 | 1997-2010 | 4630  |
| FPM00091958 | 27°37'S | 144°20'W | 2   | RAPA                         | French Polynesia               | 1967/2016 | 1967-2016 | 18548 |
| FRM00007110 | 48°27'N | 4°25'W   | 99  | BREST-GUIPAVAS               | France                         | 1940/2016 | 1949-2016 | 42047 |
| FRM00007130 | 48° 4'N | 1°44'W   | 37  | RENNES                       | France                         | 1920/1996 | 1994-1996 | 23    |
| FRM00007145 | 48°46'N | 2° 1'E   | 167 | TRAPPES                      | France                         | 1949/2016 | 1949-2016 | 42856 |
| FRM00007180 | 48°41'N | 6°13'E   | 225 | NANCY/ESSEY                  | France                         | 1954/2010 | 1954-2010 | 25930 |
| FRM00007190 | 48°33'N | 7°38'E   | 154 | STRASBOURG                   | France                         | 1920/1952 | 1949-1952 | 1255  |
| FRM00007255 | 47° 4'N | 2°22'E   | 161 | BOURGES                      | France                         | 1973/2001 | 1982-1982 | 118   |
| FRM00007354 | 46°51'N | 1°43'E   | 164 | CHATEAUROUX                  | France                         | 1957/1964 | 1957-1964 | 5080  |
| FRM00007480 | 45°43'N | 4°57'E   | 200 | LYON-BRON                    | France                         | 1948/1975 | 1948-1953 | 2966  |
|             |         |          |     |                              |                                |           | 1957-1958 | 602   |
|             |         |          |     |                              |                                |           | 1963-1975 | 5249  |
| FRM00007481 | 45°44'N | 5° 5'E   | 250 | LYON-ST EXUPERY              | France                         | 1975/2011 | 1975-2011 | 24539 |
| FRM00007510 | 44°50'N | 0°41'W   | 51  | BORDEAUX MERIGNAC            | France                         | 1920/2016 | 1949-2016 | 42466 |
| FRM00007630 | 43°38'N | 1°22'E   | 154 | TOULOUSE BLAGNAC             | France                         | 1973/1984 | 1973-1977 | 219   |

|             |         |         |      |                       |                                 |           |           |       |
|-------------|---------|---------|------|-----------------------|---------------------------------|-----------|-----------|-------|
|             |         |         |      |                       |                                 |           | 1979-1979 | 24    |
|             |         |         |      |                       |                                 |           | 1981-1984 | 238   |
| FRM00007645 | 43°51'N | 4°24'E  | 60   | NIMES-COURBESSAC      | France                          | 1949/2016 | 1949-2016 | 41803 |
| FRM00007680 | 43°25'N | 6°45'E  | 6    | SAINT-RAPHAEL         | France                          | 1982/1982 | 1982-1982 | 138   |
| FRM00007690 | 43°39'N | 7°12'E  | 4    | NICE                  | France                          | 1973/1999 | 1999-1999 | 131   |
| FRM00007761 | 41°55'N | 8°48'E  | 6    | AJACCIO               | France                          | 1951/2016 | 1951-1953 | 696   |
|             |         |         |      |                       |                                 |           | 1957-1958 | 565   |
|             |         |         |      |                       |                                 |           | 1964-2016 | 31461 |
| FRXUAC03602 | 48° 4'N | 5° 2'E  | 310  | CHAUMONT              | France                          | 1953/1959 | -         | 0     |
| FSM00061996 | 37°48'S | 77°34'E | 27   | MARTIN DE VIVIES      | French South. and Antarc. Lands | 1951/2011 | 1951-1957 | 2177  |
|             |         |         |      |                       |                                 |           | 1962-1965 | 1240  |
|             |         |         |      |                       |                                 |           | 1967-2011 | 13093 |
| FSM00061998 | 49°21'S | 70°15'E | 29   | PORT-AUX-FRANCAIS     | French South. and Antarc. Lands | 1968/2016 | 1968-2016 | 14005 |
| GBM00064500 | 0°27'N  | 9°25'E  | 12   | LIBREVILLE            | Gabon                           | 1973/2016 | 1999-2003 | 981   |
|             |         |         |      |                       |                                 |           | 2005-2016 | 2291  |
| GBM00064501 | 0°42'S  | 8°45'E  | 3    | PORT-GENTIL           | Gabon                           | 1950/2002 | 1957-1958 | 176   |
| GGM00037260 | 43° 0'N | 40°59'E | 116  | SUKHUMI (AGMS)        | Georgia                         | 1947/1972 | 1947-1972 | 15373 |
| GGM00037484 | 41°38'N | 41°36'E | 32   | BATUMI                | Georgia                         | 1968/1991 | 1968-1991 | 6912  |
| GGM00037549 | 41°41'N | 44°57'E | 467  | TBILISI/NOVOALEXEYE   | Georgia                         | 1946/2004 | 1946-1948 | 485   |
|             |         |         |      |                       |                                 |           | 1950-1952 | 384   |
|             |         |         |      |                       |                                 |           | 1955-2000 | 27420 |
|             |         |         |      |                       |                                 |           | 2004-2004 | 31    |
| GHM00065418 | 9°30'N  | 0°51'W  | 173  | TAMALE                | Ghana Spratly Islands           | 1973/2008 | 1974-1977 | 433   |
|             |         |         |      |                       |                                 |           | 1979-1979 | 66    |
|             |         |         |      |                       |                                 |           | 2006-2008 | 449   |
| GIM00008495 | 36° 9'N | 5°21'W  | 3    | GIBRALTAR             | Gibraltar                       | 1951/2015 | 1951-1954 | 1086  |
|             |         |         |      |                       |                                 |           | 1957-2015 | 37335 |
| GLM00004202 | 76°32'N | 68°45'W | 77   | PITUFFIK              | Greenland                       | 1946/2006 | 1946-2006 | 50214 |
| GLM00004220 | 68°42'N | 52°51'W | 43   | AASIAAT (EGEDESMINDE) | Greenland                       | 1950/2016 | 1950-2016 | 43629 |
| GLM00004231 | 67° 0'N | 50°48'W | 46   | KANGERLUSSUAK         | Greenland                       | 1946/1950 | 1946-1950 | 2764  |
| GLM00004270 | 61°10'N | 45°25'W | 34   | MITTARFIK NARSARSUAQ  | Greenland                       | 1946/2016 | 1946-1958 | 13619 |
|             |         |         |      |                       |                                 |           | 1963-2016 | 35997 |
| GLM00004310 | 81°36'N | 16°40'W | 40   | NORD                  | Greenland                       | 1953/1972 | 1953-1972 | 10775 |
| GLM00004320 | 76°46'N | 18°40'W | 11   | DANMARKSHAVN          | Greenland                       | 1950/2016 | 1950-2016 | 40045 |
| GLM00004339 | 70°29'N | 21°57'W | 70   | ITTOQQORTOORMIT       | Greenland                       | 1946/2016 | 1946-1949 | 519   |
|             |         |         |      |                       |                                 |           | 1980-2016 | 25134 |
| GLM00004340 | 70°25'N | 21°58'W | 22   | KAP TOBIN             | Greenland                       | 1949/1980 | 1949-1980 | 18337 |
| GLM00004360 | 65°37'N | 37°38'W | 54   | TASIILAQ (AMMASSALIK) | Greenland                       | 1949/2016 | 1949-2016 | 43107 |
| GLM00004417 | 72°35'N | 38°28'W | 3255 | GEOSUMMIT             | Greenland                       | 2012/2016 | 2012-2016 | 3432  |
| GLXUA042705 | 63°26'N | 51°11'W | 41   | MARRAK POINT          | Greenland                       | 1947/1948 | 1947-1948 | 353   |
| GLXUAC03499 | 65°56'N | 36°41'W | 57   | IKATEQ                | Greenland                       | 1946/1947 | -         | 0     |
| GLXUAC03509 | 77°14'N | 62°20'W | 1704 | THULE                 | Greenland                       | 1954/1954 | -         | 0     |
| GMM00010034 | 54°38'N | 9°21'E  | 20   | EGGEBECK              | Germany                         | 1949/1954 | 1949-1954 | 2809  |
| GMM00010035 | 54°32'N | 9°33'E  | 47   | SCHLESWIG             | Germany                         | 1954/2016 | 1954-1972 | 12365 |
|             |         |         |      |                       |                                 |           | 1997-2016 | 14459 |
| GMM00010046 | 54°23'N | 10° 9'E | 32   | KEIL/HOLTENAU         | Germany                         | 1969/1972 | 1969-1972 | 980   |
| GMM00010113 | 53°43'N | 7° 9'E  | 11   | NORDERNEY             | Germany                         | 2011/2016 | 2011-2016 | 4012  |
| GMM00010122 | 53°32'N | 7°53'E  | 7    | JEVER                 | Germany                         | 1949/1952 | 1949-1952 | 864   |
| GMM00010184 | 54° 6'N | 13°24'E | 2    | GREIFSWALD            | Germany                         | 1950/2016 | 1950-1972 | 15694 |
|             |         |         |      |                       |                                 |           | 1997-2016 | 14439 |

|             |         |          |     |                           |            |           |           |       |
|-------------|---------|----------|-----|---------------------------|------------|-----------|-----------|-------|
| GMM00010200 | 53°23'N | 7°14'E   | 0   | EMDEN-FLUGPLATZ           | Germany    | 1952/2011 | 1952-1972 | 9810  |
|             |         |          |     |                           |            |           | 1978-2011 | 27113 |
| GMM00010238 | 52°49'N | 9°56'E   | 70  | BERGEN                    | Germany    | 1969/2016 | 1969-2016 | 37351 |
| GMM00010304 | 52°44'N | 7°20'E   | 41  | MEPPEN                    | Germany    | 1972/2016 | 1972-1972 | 28    |
|             |         |          |     |                           |            |           | 1975-2016 | 19887 |
| GMM00010307 | 52°25'N | 7° 4'E   | 81  | NORDHORN                  | Germany    | 1971/1972 | 1971-1972 | 372   |
| GMM00010338 | 52°27'N | 9°43'E   | 52  | HANNOVER                  | Germany    | 1949/1972 | 1949-1972 | 10818 |
| GMM00010384 | 52°28'N | 13°24'E  | 50  | BERLIN/TEMPELHOF          | Germany    | 1941/1972 | 1946-1955 | 9032  |
|             |         |          |     |                           |            |           | 1967-1972 | 1410  |
| GMM00010393 | 52°13'N | 14° 7'E  | 112 | LINDENBERG                | Germany    | 1905/2016 | 1950-1972 | 16847 |
|             |         |          |     |                           |            |           | 1997-2016 | 27657 |
| GMM00010404 | 51°44'N | 6°16'E   | 43  | KALKAR                    | Germany    | 1971/1978 | 1971-1978 | 2775  |
| GMM00010410 | 51°24'N | 6°58'E   | 153 | ESSEN-BREDENEY            | Germany    | 1965/2016 | 1965-1972 | 4817  |
|             |         |          |     |                           |            |           | 1997-2016 | 13515 |
| GMM00010419 | 51°14'N | 7°36'E   | 458 | LUDENSCHIED               | Germany    | 1949/1952 | 1949-1952 | 998   |
| GMM00010437 | 51° 8'N | 9°17'E   | 222 | FRITZLAR/KASSELER         | Germany    | 2000/2007 | 2000-2007 | 4193  |
| GMM00010454 | 51°51'N | 10°46'E  | 234 | WERNIGERODE               | Germany    | 1950/1964 | 1950-1964 | 9790  |
| GMM00010468 | 51°33'N | 12° 4'E  | 106 | OPPIN                     | Germany    | 2000/2006 | 2000-2006 | 2901  |
| GMM00010486 | 51° 7'N | 13°41'E  | 249 | WAHNSDORF                 | Germany    | 1950/2000 | 1950-1972 | 14602 |
|             |         |          |     |                           |            |           | 1997-2000 | 1954  |
| GMM00010513 | 50°52'N | 7° 8'E   | 91  | KOLN/BONN                 | Germany    | 1962/1965 | 1962-1965 | 1759  |
| GMM00010548 | 50°34'N | 10°23'E  | 450 | MEININGEN                 | Germany    | 1969/2016 | 1969-1972 | 2449  |
|             |         |          |     |                           |            |           | 1997-2016 | 14446 |
| GMM00010610 | 49°57'N | 6°34'E   | 367 | BITBURG                   | Germany    | 1954/1959 | 1954-1959 | 3759  |
| GMM00010618 | 49°42'N | 7°20'E   | 376 | IDAR-OBERSTEIN            | Germany    | 1971/2016 | 1971-2016 | 42004 |
| GMM00010619 | 49°39'N | 7°18'E   | 426 | BAUMHOLDER (USA-AF)       | Germany    | 1974/1989 | 1974-1976 | 107   |
|             |         |          |     |                           |            |           | 1981-1989 | 1207  |
| GMM00010633 | 50° 3'N | 8°20'E   | 139 | WIESBADEN                 | Germany    | 1946/1957 | 1946-1957 | 9613  |
| GMM00010639 | 50° 1'N | 8°40'E   | 135 | LANGEN                    | Germany    | 1973/1975 | 1973-1975 | 327   |
| GMM00010642 | 50°10'N | 8°57'E   | 112 | HANAU                     | Germany    | 1969/1971 | 1969-1971 | 164   |
| GMM00010659 | 49°45'N | 10°12'E  | 160 | KITZINGEN AAF             | Germany    | 1971/1972 | 1971-1972 | 175   |
| GMM00010687 | 49°42'N | 11°57'E  | 414 | GRAFENWOEHR               | Germany    | 1970/1992 | 1970-1971 | 145   |
|             |         |          |     |                           |            |           | 1975-1992 | 2982  |
| GMM00010739 | 48°50'N | 9°12'E   | 314 | STUTTGART/SCHNARRENBURG   | Germany    | 1957/2016 | 1957-1972 | 8494  |
|             |         |          |     |                           |            |           | 1997-2016 | 15398 |
| GMM00010764 | 49°23'N | 11°10'E  | 386 | FEUCHT(USA-AF)            | Germany    | 1979/1990 | 1979-1990 | 1504  |
| GMM00010771 | 49°26'N | 11°54'E  | 417 | KUEMMERSBRUCK             | Germany    | 1969/2016 | 1969-2016 | 41821 |
| GMM00010828 | 48° 6'N | 9°15'E   | 646 | SIGMARINGEN               | Germany    | 2000/2007 | 2000-2007 | 3759  |
| GMM00010866 | 48°21'N | 11°47'E  | 453 | MUNICH/RIEM               | Germany    | 1946/1976 | 1946-1976 | 18465 |
| GMM00010868 | 48°15'N | 11°33'E  | 484 | MUENCHEN-OBERSCHLEISSHEIM | Germany    | 1976/2016 | 1976-2016 | 29723 |
| GMM00010921 | 47°59'N | 8°54'E   | 807 | NEUHAUSEN OB ECK          | Germany    | 1971/1972 | 1971-1972 | 232   |
| GMM00010934 | 47°39'N | 9°29'E   | 407 | FRIEDRICHSHAFEN           | Germany    | 1909/1954 | 1951-1954 | 699   |
| GMM00010954 | 47°50'N | 10°52'E  | 756 | ALTENSTADT                | Germany    | 1977/2016 | 2004-2016 | 7383  |
| GMM00010962 | 47°48'N | 11° 1'E  | 977 | HOHENPEISSENBERG          | Germany    | 2000/2016 | 2000-2011 | 1195  |
|             |         |          |     |                           |            |           | 2013-2016 | 517   |
| GMXUAC00001 | 48° 1'N | 7°50'E   | 268 | FREIBURG                  | Germany    | 1940/1942 | -         | 0     |
| GMXUAC00002 | 49°45'N | 6°59'E   | 273 | TRIER                     | Germany    | 1939/1940 | -         | 0     |
| GMXUAC00006 | 51° 1'N | 11° 2'E  | 320 | ERFURT                    | Germany    | 1939/1942 | -         | 0     |
| GPM00078897 | 16°16'N | 61°31'W  | 11  | LE RAIZET AERO            | Guadeloupe | 1952/2016 | 1952-2016 | 33102 |
| GQM00091212 | 13°29'N | 144°48'E | 75  | WEATHER FORECAST OFFICE   | Guam       | 1945/2016 | 1947-2016 | 53195 |

|             |         |          |      |                            |                               |           |           |       |
|-------------|---------|----------|------|----------------------------|-------------------------------|-----------|-----------|-------|
| GRM00016622 | 40°32'N | 22°58'E  | 7    | THESSALONIKI (AIRPORT)     | Greece                        | 1955/2016 | 1955-1976 | 4479  |
|             |         |          |      |                            |                               |           | 1978-1980 | 155   |
|             |         |          |      |                            |                               |           | 1982-2016 | 16399 |
| GRM00016716 | 37°53'N | 23°45'E  | 43   | ATHINAI HELLINIKON         | Greece                        | 1949/2016 | 1949-2012 | 36621 |
|             |         |          |      |                            |                               |           | 2014-2016 | 1087  |
| GRM00016754 | 35°20'N | 25°11'E  | 35   | HERAKLEION (AIRPORT)       | Greece                        | 1964/2016 | 1964-1971 | 6254  |
|             |         |          |      |                            |                               |           | 1973-1993 | 8735  |
|             |         |          |      |                            |                               |           | 1995-2016 | 9035  |
| GTM00078641 | 14°32'N | 90°34'W  | 1496 | GUATEMALA CITY             | Guatemala                     | 1973/1990 | 1973-1990 | 4888  |
| GVM00061831 | 9°34'N  | 13°37'W  | 49   | CONAKRY                    | Guinea                        | 1940/2000 | 1975-1975 | 1     |
|             |         |          |      |                            |                               |           | 1993-1994 | 44    |
|             |         |          |      |                            |                               |           | 1999-2000 | 60    |
| HKM00045004 | 22°20'N | 114°10'E | 24   | KOWLOON                    | Hong Kong                     | 1949/2016 | 1949-2016 | 44990 |
| HMM00094997 | 53° 6'S | 73°43'E  | 13   | HEARD IS.(THESPIT)         | Heard Isl. and McDonald Isls. | 1948/1954 | 1948-1948 | 243   |
|             |         |          |      |                            |                               |           | 1950-1954 | 655   |
| HOM00078501 | 17°24'N | 83°56'W  | 11   | SWAN ISLAND                | Honduras                      | 1948/1980 | 1948-1980 | 22704 |
| HOM00078720 | 14° 3'N | 87°15'W  | 1002 | TEGUCIGALPA                | Honduras                      | 1976/1997 | 1976-1994 | 5317  |
|             |         |          |      |                            |                               |           | 1997-1997 | 150   |
| HOM00078721 | 14°22'N | 87°37'W  | 628  | SOTO CANO AB               | Honduras                      | 2008/2016 | 2008-2009 | 210   |
|             |         |          |      |                            |                               |           | 2011-2012 | 88    |
| HRM00013334 | 43°31'N | 16°26'E  | 129  | SPLIT/MARJAN               | Croatia                       | 1956/1963 | 1956-1963 | 2509  |
| HRM00014240 | 45°49'N | 16° 2'E  | 123  | ZAGREB/MAKSIMIR            | Croatia                       | 1955/2016 | 1955-1972 | 6772  |
|             |         |          |      |                            |                               |           | 1996-2016 | 14857 |
| HRM00014430 | 44° 6'N | 15°20'E  | 78   | ZADAR RS                   | Croatia                       | 2002/2016 | 2002-2016 | 9083  |
| HUM00012812 | 47°16'N | 16°38'E  | 221  | SZOMBATHELY                | Hungary                       | 1982/1982 | 1982-1982 | 183   |
| HUM00012843 | 47°26'N | 19°11'E  | 138  | BUDAPEST/PESTSZENTLORINC   | Hungary                       | 1949/2016 | 1949-2016 | 53099 |
| HUM00012982 | 46°15'N | 20° 6'E  | 82   | SZEGED                     | Hungary                       | 1965/2016 | 1965-1993 | 18727 |
|             |         |          |      |                            |                               |           | 1995-2016 | 8469  |
| ICM00004018 | 63°59'N | 22°36'W  | 52   | KEFLAVIKURFLUGVOLLUR       | Iceland                       | 1946/2016 | 1946-2016 | 63414 |
| ICM00004089 | 65°17'N | 14°24'W  | 23   | EGILSSTADIR                | Iceland                       | 1996/2016 | 1996-1996 | 101   |
|             |         |          |      |                            |                               |           | 2010-2016 | 1605  |
| ICXUAE05425 | 64° 8'N | 21°54'W  | 61   | REYKJAVIK                  | Iceland                       | 1921/1939 | -         | 0     |
| IDM00096011 | 5°31'N  | 95°25'E  | 21   | BANDA ACEH/BLANG BINTANG   | Indonesia                     | 1973/2016 | 2006-2006 | 1     |
|             |         |          |      |                            |                               |           | 2008-2008 | 2     |
|             |         |          |      |                            |                               |           | 2015-2016 | 501   |
| IDM00096035 | 3°38'N  | 98°53'E  | 25   | KUALANAMU MEDAN            | Indonesia                     | 1973/2016 | 1975-1984 | 2901  |
|             |         |          |      |                            |                               |           | 1986-2016 | 11221 |
| IDM00096147 | 3°57'N  | 108°23'E | 2    | RANAI                      | Indonesia                     | 1978/2016 | 2006-2016 | 5439  |
| IDM00096163 | 0°47'S  | 100°17'E | 3    | MIA PADANG                 | Indonesia                     | 1973/2016 | 1988-2016 | 10502 |
| IDM00096237 | 2°10'S  | 106° 8'E | 33   | PANGKAL PINANG             | Indonesia                     | 1973/2016 | 1986-2002 | 2675  |
|             |         |          |      |                            |                               |           | 2004-2016 | 6736  |
| IDM00096253 | 3°53'S  | 102°20'E | 16   | BENGKULU/PADANG KEMILING   | Indonesia                     | 1973/2016 | 2004-2004 | 1     |
|             |         |          |      |                            |                               |           | 2008-2008 | 1     |
|             |         |          |      |                            |                               |           | 2016-2016 | 552   |
| IDM00096509 | 3°20'N  | 117°34'E | 6    | TARAKAN/JUWATA             | Indonesia                     | 1973/2016 | 2007-2007 | 1     |
|             |         |          |      |                            |                               |           | 2015-2016 | 663   |
| IDM00096581 | 0° 9'S  | 109°24'E | 3    | PONTIANAK/SUPADIO          | Indonesia                     | 1974/2016 | 2016-2016 | 559   |
| IDM00096645 | 2°42'S  | 111°42'E | 25   | PANGKALAN BUN/ISKANDAR     | Indonesia                     | 1983/2016 | 2015-2016 | 768   |
| IDM00096685 | 3°26'S  | 114°45'E | 20   | BANJARMASIN/SYAMSUDIN NOOR | Indonesia                     | 1973/2016 | 2004-2004 | 1     |
|             |         |          |      |                            |                               |           | 2007-2008 | 2     |

|             |         |          |      |                          |           |           |           |       |
|-------------|---------|----------|------|--------------------------|-----------|-----------|-----------|-------|
|             |         |          |      |                          |           |           | 2016-2016 | 549   |
| IDM00096749 | 6° 7'S  | 106°39'E | 8    | JAKARTA/SOEKARNO-HATTA   | Indonesia | 1909/2016 | 1955-1964 | 3023  |
|             |         |          |      |                          |           |           | 1967-1972 | 660   |
|             |         |          |      |                          |           |           | 1986-2016 | 12815 |
| IDM00096781 | 6°54'S  | 107°35'E | 740  | BANDUNG/HUSEIN           | Indonesia | 1961/1989 | 1961-1962 | 256   |
|             |         |          |      |                          |           |           | 1977-1979 | 125   |
| IDM00096805 | 7°44'S  | 109° 1'E | 6    | CILACAP                  | Indonesia | 1973/2016 | 2014-2016 | 772   |
| IDM00096881 | 7°37'S  | 111°31'E | 110  | MADIUN/ISWAHYUD AFB      | Indonesia | 1973/1993 | 1977-1980 | 80    |
| IDM00096935 | 7°23'S  | 112°48'E | 3    | JUANDA SURABAYA          | Indonesia | 1957/2016 | 1957-1959 | 428   |
|             |         |          |      |                          |           |           | 1961-1962 | 432   |
|             |         |          |      |                          |           |           | 1973-1977 | 822   |
|             |         |          |      |                          |           |           | 1979-2016 | 12809 |
| IDM00097014 | 1°32'N  | 124°55'E | 80   | MENADO/ SAM RATULANGI    | Indonesia | 1973/2016 | 1973-1973 | 1     |
|             |         |          |      |                          |           |           | 1976-1982 | 1106  |
|             |         |          |      |                          |           |           | 1985-2016 | 12762 |
| IDM00097072 | 0°41'S  | 119°44'E | 6    | PALU/MUTIARA             | Indonesia | 1975/2016 | 1986-2016 | 10486 |
| IDM00097180 | 5° 4'S  | 119°33'E | 14   | UJUNG PANDANG/HASANUDDIN | Indonesia | 1973/2016 | 1975-1982 | 2185  |
|             |         |          |      |                          |           |           | 1984-2016 | 12711 |
| IDM00097372 | 10°10'S | 123°40'E | 108  | KUPANG/ELTARI            | Indonesia | 1973/2016 | 1987-2016 | 10587 |
| IDM00097502 | 0°54'S  | 131°17'E | 3    | DEO SORONG               | Indonesia | 1987/2016 | 1989-1989 | 33    |
|             |         |          |      |                          |           |           | 1992-1992 | 2     |
|             |         |          |      |                          |           |           | 2014-2016 | 1390  |
| IDM00097560 | 1°11'S  | 136° 7'E | 11   | BIAK/FRANS KAISIEPO      | Indonesia | 1973/2016 | 1973-1974 | 185   |
|             |         |          |      |                          |           |           | 1976-1978 | 254   |
|             |         |          |      |                          |           |           | 1984-2016 | 10861 |
| IDM00097724 | 3°42'S  | 128° 5'E | 12   | AMBON/PATTIMURA          | Indonesia | 1978/2016 | 1978-1979 | 113   |
|             |         |          |      |                          |           |           | 1981-1982 | 139   |
|             |         |          |      |                          |           |           | 1991-1999 | 1745  |
|             |         |          |      |                          |           |           | 2006-2016 | 5934  |
| IDM00097900 | 7°59'S  | 131°18'E | 24   | SAUMLAKI/OLILIT          | Indonesia | 1978/2016 | 2005-2007 | 9     |
|             |         |          |      |                          |           |           | 2016-2016 | 563   |
| IDM00097980 | 8°28'S  | 140°23'E | 3    | MERAUKE/MOPAH            | Indonesia | 1987/2016 | 1987-1987 | 1     |
|             |         |          |      |                          |           |           | 1994-2001 | 867   |
|             |         |          |      |                          |           |           | 2003-2003 | 15    |
|             |         |          |      |                          |           |           | 2005-2016 | 5707  |
| INM00042027 | 34° 5'N | 74°50'E  | 1585 | SRINAGAR                 | India     | 1962/2016 | 1962-2016 | 23239 |
| INM00042071 | 31°38'N | 74°52'E  | 229  | AMRITSAR                 | India     | 1957/2016 | 1957-1960 | 1849  |
| INM00042101 | 30°20'N | 76°28'E  | 251  | PATIALA                  | India     | 1975/2016 | 1978-2016 | 21126 |
| INM00042111 | 30°19'N | 78° 2'E  | 683  | DEHRA DUN                | India     | 1973/2016 | 2016-2016 | 230   |
| INM00042182 | 28°35'N | 77°12'E  | 211  | NEW DELHI/SAFDARJUNG     | India     | 1930/2016 | 1945-1954 | 3044  |
|             |         |          |      |                          |           |           | 1956-2016 | 38390 |
| INM00042314 | 27°29'N | 95° 1'E  | 110  | DIBRUGARH /MOHANBARI     | India     | 1945/2016 | 1945-1946 | 188   |
|             |         |          |      |                          |           |           | 1978-2016 | 15303 |
| INM00042339 | 26°18'N | 73° 1'E  | 217  | JODHPUR                  | India     | 1935/2016 | 1949-1954 | 1830  |
|             |         |          |      |                          |           |           | 1956-2016 | 30431 |
| INM00042348 | 26°49'N | 75°48'E  | 383  | JAIPUR / SANGANER        | India     | 1973/2016 | 2015-2016 | 306   |
| INM00042361 | 26°14'N | 78°15'E  | 205  | GWALIOR                  | India     | 1938/2016 | 1960-1961 | 178   |
|             |         |          |      |                          |           |           | 1978-2016 | 17348 |
| INM00042369 | 26°45'N | 80°53'E  | 122  | LUCKNOW/AMAUSI           | India     | 1967/2016 | 1967-2016 | 26733 |
| INM00042379 | 26°45'N | 83°22'E  | 78   | GORAKHPUR                | India     | 1973/2016 | 1981-2016 | 13838 |

|             |         |         |      |                                |       |           |           |       |
|-------------|---------|---------|------|--------------------------------|-------|-----------|-----------|-------|
| INM00042397 | 26°40'N | 88°22'E | 123  | SILIGURI                       | India | 1973/2016 | 1988-2015 | 11071 |
| INM00042410 | 26° 6'N | 91°35'E | 54   | GUWAHATI                       | India | 1956/2016 | 1956-2016 | 30648 |
| INM00042475 | 25°27'N | 81°44'E | 98   | ALLAHABAD/BAMHRAULI            | India | 1930/2008 | 1945-1954 | 2656  |
|             |         |         |      |                                |       |           | 1956-1966 | 4874  |
| INM00042492 | 25°36'N | 85°10'E | 51   | PATNA                          | India | 1928/2016 | 1983-2016 | 16612 |
| INM00042516 | 25°34'N | 91°53'E | 1500 | SHILLONG S06 03Z               | India | 1953/1954 | 1953-1954 | 280   |
| INM00042647 | 23° 4'N | 72°38'E | 55   | AHMADABAD                      | India | 1928/2016 | 1962-2016 | 27104 |
| INM00042667 | 23°17'N | 77°21'E | 522  | BHOPAL/BAIRAGHAR               | India | 1973/2016 | 1983-2016 | 16598 |
| INM00042701 | 23°19'N | 85°19'E | 646  | M.O. RANCHI                    | India | 1929/2016 | 1993-2016 | 9966  |
| INM00042724 | 23°53'N | 91°15'E | 16   | AGARTALA                       | India | 1973/2016 | 1978-2016 | 17441 |
| INM00042779 | 22°46'N | 81°54'E | 625  | PENDRA ROAD                    | India | 1981/1993 | 1981-1993 | 5283  |
| INM00042809 | 22°39'N | 88°27'E | 6    | KOLKATA/DUM DUM                | India | 1938/2016 | 1946-2016 | 39369 |
| INM00042867 | 21° 6'N | 79° 3'E | 310  | NAGPUR SONEGAON                | India | 1946/2016 | 1946-1954 | 2398  |
|             |         |         |      |                                |       |           | 1956-2016 | 34174 |
| INM00042874 | 21°14'N | 81°39'E | 296  | PBO RAIPUR                     | India | 1973/2016 | 1994-1999 | 2596  |
|             |         |         |      |                                |       |           | 2002-2016 | 5107  |
| INM00042886 | 21°55'N | 84° 5'E | 228  | JHARSUGUDA                     | India | 1973/2016 | 2016-2016 | 101   |
| INM00042895 | 21°31'N | 86°56'E | 19   | BALASORE                       | India | 1979/2016 | 1979-1979 | 129   |
| INM00042909 | 20°54'N | 70°22'E | 6    | VERAVAL                        | India | 1941/2008 | 1945-1954 | 2714  |
|             |         |         |      |                                |       |           | 1956-1961 | 2644  |
| INM00042970 | 20°29'N | 85°52'E | 26   | CUTTACK                        | India | 1945/1946 | 1945-1946 | 318   |
| INM00042971 | 20°15'N | 85°50'E | 45   | BHUBANESHWAR                   | India | 1971/2016 | 1971-2016 | 26140 |
| INM00043003 | 19° 7'N | 72°51'E | 14   | BOMBAY / SANTACRUZ             | India | 1938/2016 | 1955-2016 | 36056 |
| INM00043014 | 19°51'N | 75°24'E | 585  | AURANGABAD CHIKALTHANA AERODRO | India | 1973/2016 | 1979-2012 | 17115 |
|             |         |         |      |                                |       |           | 2015-2016 | 269   |
| INM00043041 | 19° 5'N | 82° 2'E | 554  | JAGDALPUR                      | India | 1973/2016 | 1981-2016 | 15138 |
| INM00043049 | 19°16'N | 84°53'E | 16   | GOPALPUR                       | India | 1973/2016 | 1979-1979 | 44    |
| INM00043063 | 18°32'N | 73°51'E | 555  | PUNE                           | India | 1926/2016 | 1945-1956 | 3305  |
|             |         |         |      |                                |       |           | 2016-2016 | 86    |
| INM00043110 | 16°59'N | 73°20'E | 91   | RATNAGIRI                      | India | 1973/2016 | 2016-2016 | 131   |
| INM00043128 | 17°27'N | 78°28'E | 530  | HYDERABAD AIRPORT              | India | 1929/2016 | 1971-2016 | 24996 |
| INM00043150 | 17°41'N | 83°18'E | 70   | VISHAKHAPATNAM/WALTAIR         | India | 1938/2016 | 1945-2016 | 34556 |
| INM00043181 | 16°32'N | 80°48'E | 24   | VIJAYAWADA/GANNAVA             | India | 1973/1982 | 1981-1982 | 699   |
| INM00043185 | 16°12'N | 81° 9'E | 3    | MACHILIPATNAM/FRANCHPET        | India | 1983/2016 | 1983-2016 | 16231 |
| INM00043192 | 15°29'N | 73°49'E | 58   | GOA/PANJIM                     | India | 1954/2016 | 1971-2016 | 22929 |
| INM00043279 | 13° 0'N | 80°11'E | 14   | CHENNAI/MINAMBAKKAM            | India | 1926/2016 | 1946-2016 | 38931 |
| INM00043285 | 12°57'N | 74°50'E | 31   | MANGALORE/PANAMBUR             | India | 1973/2016 | 1975-2016 | 22214 |
| INM00043295 | 12°58'N | 77°35'E | 917  | BANGALORE                      | India | 1926/2016 | 1945-1946 | 165   |
|             |         |         |      |                                |       |           | 1961-1978 | 6958  |
|             |         |         |      |                                |       |           | 1981-2012 | 18112 |
|             |         |         |      |                                |       |           | 2014-2016 | 852   |
| INM00043311 | 11° 7'N | 72°44'E | 3    | AMINIDIVI                      | India | 1973/2016 | 1973-1974 | 4     |
|             |         |         |      |                                |       |           | 1979-2016 | 13671 |
| INM00043333 | 11°40'N | 92°43'E | 79   | PORT BLAIR                     | India | 1926/2016 | 1949-2016 | 29664 |
| INM00043346 | 10°55'N | 79°50'E | 7    | KARAIKAL                       | India | 1973/2016 | 1979-2016 | 19848 |
| INM00043353 | 9°56'N  | 76°14'E | 1    | COCHIN (IN-NAVY)               | India | 1967/2016 | 1967-1972 | 1540  |
|             |         |         |      |                                |       |           | 1997-2016 | 7999  |
| INM00043369 | 8°18'N  | 73° 9'E | 1    | MINICOY                        | India | 1965/2016 | 1965-2016 | 22774 |
| INM00043371 | 8°29'N  | 76°57'E | 60   | THIRUVANANTHAPURAM             | India | 1928/2016 | 1947-2016 | 35396 |
| INXUAC03369 | 22°46'N | 88°22'E | 0    | BARAKPUR                       | India | 1944/1946 | -         | 0     |

|             |         |         |      |                         |                                |           |           |       |
|-------------|---------|---------|------|-------------------------|--------------------------------|-----------|-----------|-------|
| IOM00061967 | 7°18'S  | 72°24'E | 3    | DIEGO GARCIA            | British Indian Ocean Territory | 1967/2006 | 1967-2006 | 14594 |
| IRM00040706 | 38° 5'N | 46°17'E | 1367 | TABRIZ                  | Iran                           | 1970/2016 | 1970-1980 | 1371  |
|             |         |         |      |                         |                                |           | 1989-2014 | 7771  |
|             |         |         |      |                         |                                |           | 2016-2016 | 285   |
| IRM00040745 | 36°16'N | 59°38'E | 999  | MASHHAD                 | Iran                           | 1969/2016 | 1969-1980 | 2419  |
|             |         |         |      |                         |                                |           | 1989-2016 | 11799 |
| IRM00040754 | 35°41'N | 51°19'E | 1204 | TEHRAN-MEHRABAD         | Iran                           | 1961/2016 | 1961-1980 | 6910  |
|             |         |         |      |                         |                                |           | 1989-2016 | 15976 |
| IRM00040766 | 34°21'N | 47° 9'E | 1319 | KERMANSHAH              | Iran                           | 1973/2016 | 1973-1980 | 1538  |
|             |         |         |      |                         |                                |           | 1989-2016 | 12114 |
| IRM00040800 | 32°31'N | 51°42'E | 1550 | ESFAHAN                 | Iran                           | 1969/2016 | 1969-1971 | 134   |
|             |         |         |      |                         |                                |           | 1973-1980 | 1208  |
|             |         |         |      |                         |                                |           | 1989-2016 | 6945  |
| IRM00040809 | 32°52'N | 59°12'E | 1491 | BIRJAND                 | Iran                           | 1989/2016 | 1989-2012 | 5030  |
|             |         |         |      |                         |                                |           | 2015-2016 | 464   |
| IRM00040811 | 31°20'N | 48°40'E | 20   | AHWAZ                   | Iran                           | 1989/2016 | 1989-1989 | 38    |
|             |         |         |      |                         |                                |           | 2001-2012 | 3178  |
|             |         |         |      |                         |                                |           | 2015-2016 | 673   |
| IRM00040821 | 31°54'N | 54°17'E | 1238 | YAZD                    | Iran                           | 2005/2012 | 2005-2012 | 1506  |
| IRM00040841 | 30°15'N | 56°58'E | 1748 | KERMAN                  | Iran                           | 1967/2016 | 1967-1967 | 78    |
|             |         |         |      |                         |                                |           | 1969-1969 | 44    |
|             |         |         |      |                         |                                |           | 1971-1971 | 34    |
|             |         |         |      |                         |                                |           | 1973-1980 | 1571  |
|             |         |         |      |                         |                                |           | 1989-2016 | 7508  |
| IRM00040848 | 29°32'N | 52°36'E | 1484 | SHIRAZ                  | Iran                           | 1968/2016 | 1968-1980 | 1722  |
|             |         |         |      |                         |                                |           | 1989-2016 | 6997  |
| IRM00040856 | 29°28'N | 60°53'E | 1370 | ZAHDAN                  | Iran                           | 2005/2016 | 2005-2009 | 1192  |
|             |         |         |      |                         |                                |           | 2011-2016 | 1785  |
| IRM00040875 | 27°13'N | 56°22'E | 10   | BANDARABBASS            | Iran                           | 1989/2016 | 1989-2012 | 6422  |
|             |         |         |      |                         |                                |           | 2015-2016 | 459   |
| ISM00040179 | 32° 0'N | 34°49'E | 35   | BET DAGAN               | Israel                         | 1963/2016 | 1963-2016 | 38706 |
| ISM00040181 | 31°56'N | 34°50'E | 63   | BEER-YA AQOV TO 401790  | Israel                         | 1956/1963 | 1956-1963 | 2570  |
| ISM00040186 | 31°52'N | 34°41'E | 20   | ASHDOD NORTH            | Israel                         | 2008/2016 | 2008-2016 | 1326  |
| ITM00016037 | 46° 2'N | 12°36'E | 113  | AVIANO                  | Italy                          | 2010/2011 | 2010-2011 | 1508  |
| ITM00016044 | 46° 2'N | 13°11'E | 93   | CAMPOFORMIDO RDS        | Italy                          | 1958/2016 | 1958-2016 | 50376 |
| ITM00016080 | 45°28'N | 9°17'E  | 104  | MILANO LINATE RDS       | Italy                          | 1949/2016 | 1949-2016 | 54449 |
| ITM00016113 | 44°32'N | 7°37'E  | 385  | CUNEO-LEVALDIGI RDS     | Italy                          | 2000/2016 | 2000-2000 | 75    |
|             |         |         |      |                         |                                |           | 2002-2016 | 7864  |
| ITM00016144 | 44°39'N | 11°37'E | 10   | S. PIETRO CAPOFIUME RDS | Italy                          | 1986/2016 | 1986-2016 | 15972 |
| ITM00016242 | 41°48'N | 12°14'E | 3    | ROMA FIUMICINO          | Italy                          | 1952/1986 | 1952-1986 | 19786 |
| ITM00016245 | 41°40'N | 12°27'E | 32   | PRATICA DI MARE RDS     | Italy                          | 1986/2016 | 1986-2016 | 33079 |
| ITM00016320 | 40°40'N | 17°57'E | 15   | BRINDISI RDS            | Italy                          | 1953/2016 | 1953-2016 | 51776 |
| ITM00016420 | 38°12'N | 15°33'E | 59   | MESSINA                 | Italy                          | 1950/1966 | 1950-1966 | 5426  |
| ITM00016429 | 37°55'N | 12°29'E | 7    | TRAPANI BIRGI RDS       | Italy                          | 1974/2016 | 1974-2016 | 38414 |
| ITM00016546 | 39°21'N | 8°58'E  | 29   | DECIMOMANNU RDS         | Italy                          | 2012/2016 | 2012-2016 | 3556  |
| ITM00016560 | 39°15'N | 9° 4'E  | 4    | CAGLIARI ELMAS          | Italy                          | 1949/2012 | 1949-2012 | 44856 |
| ITXUAC00012 | 37°28'N | 15° 4'E | 142  | CATANIA                 | Italy                          | 1941/1943 | -         | 0     |
| ITXUAC00013 | 37°47'N | 12°27'E | 7    | MARSALA                 | Italy                          | 1941/1941 | -         | 0     |
| IVM00065555 | 7°44'N  | 5° 4'W  | 376  | BOUAKE                  | Cote d'Ivoire                  | 1940/1997 | 1995-1997 | 257   |
| IVM00065578 | 5°15'N  | 3°56'W  | 7    | ABIDJAN                 | Cote d'Ivoire                  | 1940/2016 | 1956-2001 | 17891 |



|             |         |          |     |                      |           |           |           |       |
|-------------|---------|----------|-----|----------------------|-----------|-----------|-----------|-------|
|             |         |          |     |                      |           |           | 2006-2016 | 5696  |
| IZM00040608 | 36°19'N | 43° 9'E  | 223 | MOSUL                | Iraq      | 1967/1977 | 1967-1967 | 28    |
|             |         |          |     |                      |           |           | 1969-1970 | 103   |
| IZM00040648 | 33°22'N | 43°34'E  | 45  | AL HABBANIYAH        | Iraq      | 1949/1958 | 1949-1958 | 5624  |
| IZM00040650 | 33°18'N | 44°24'E  | 32  | BAGHDAD INT. AIRPORT | Iraq      | 1958/2015 | 1958-1980 | 8935  |
|             |         |          |     |                      |           |           | 1988-1990 | 1056  |
|             |         |          |     |                      |           |           | 2003-2003 | 48    |
|             |         |          |     |                      |           |           | 2010-2010 | 54    |
|             |         |          |     |                      |           |           | 2012-2015 | 644   |
| IZM00040689 | 30°31'N | 47°47'E  | 2   | BASRAH-HUSSEN        | Iraq      | 1957/1990 | 1957-1959 | 681   |
|             |         |          |     |                      |           |           | 1961-1963 | 353   |
|             |         |          |     |                      |           |           | 1966-1970 | 331   |
|             |         |          |     |                      |           |           | 1972-1973 | 53    |
|             |         |          |     |                      |           |           | 1990-1990 | 27    |
| JAM00047401 | 45°25'N | 141°41'E | 3   | WAKKANAI             | Japan     | 1949/2016 | 1949-1954 | 3615  |
|             |         |          |     |                      |           |           | 1956-2016 | 44060 |
| JAM00047412 | 43° 4'N | 141°20'E | 18  | SAPPORO              | Japan     | 1955/2016 | 1955-2016 | 47383 |
| JAM00047418 | 42°57'N | 144°26'E | 14  | KUSHIRO              | Japan     | 2010/2016 | 2010-2016 | 4917  |
| JAM00047420 | 43°20'N | 145°35'E | 26  | NEMURO               | Japan     | 1957/2010 | 1957-2010 | 37965 |
| JAM00047580 | 40°42'N | 141°22'E | 36  | MISAWA AB            | Japan     | 1948/2016 | 1948-1955 | 7586  |
|             |         |          |     |                      |           |           | 1965-2016 | 36148 |
| JAM00047582 | 39°43'N | 140° 6'E | 6   | AKITA                | Japan     | 1956/2016 | 1956-2016 | 44299 |
| JAM00047590 | 38°16'N | 140°54'E | 43  | SENDAI               | Japan     | 1956/2008 | 1956-2008 | 37892 |
| JAM00047600 | 37°23'N | 136°54'E | 5   | WAJIMA               | Japan     | 1956/2016 | 1956-2016 | 44404 |
| JAM00047646 | 36° 3'N | 140° 8'E | 25  | TATENO               | Japan     | 1949/2016 | 1949-2016 | 45171 |
| JAM00047678 | 33° 7'N | 139°47'E | 151 | HACHIJOJIMA          | Japan     | 1958/2016 | 1958-2016 | 40862 |
| JAM00047681 | 34°45'N | 137°42'E | 46  | HAMAMATSU AB         | Japan     | 1966/2016 | 1966-2016 | 35613 |
| JAM00047696 | 35°17'N | 139°40'E | 49  | YOKOSUKA             | Japan     | 1955/1957 | 1955-1957 | 1411  |
| JAM00047741 | 35°27'N | 133° 4'E | 17  | MATSUE               | Japan     | 2010/2016 | 2010-2016 | 5002  |
| JAM00047744 | 35°26'N | 133°21'E | 6   | YONAGO               | Japan     | 1949/2010 | 1949-2010 | 40399 |
| JAM00047764 | 34° 9'N | 132°14'E | 3   | IWAKUNI              | Japan     | 1955/1957 | 1955-1957 | 1170  |
| JAM00047772 | 34°41'N | 135°31'E | 83  | OSAKA                | Japan     | 1947/1992 | 1947-1949 | 1817  |
| JAM00047778 | 33°27'N | 135°45'E | 68  | SHIONOMISAKI         | Japan     | 1956/2016 | 1956-2016 | 44490 |
| JAM00047807 | 33°35'N | 130°23'E | 3   | FUKUOKA              | Japan     | 1947/2016 | 1947-2016 | 53209 |
| JAM00047827 | 31°33'N | 130°33'E | 4   | KAGOSHIMA            | Japan     | 1956/2016 | 1956-2016 | 44758 |
| JAM00047881 | 34° 8'N | 134°36'E | 8   | TOKUSHIMA AB         | Japan     | 1970/2006 | 1970-2006 | 5198  |
| JAM00047909 | 28°24'N | 129°33'E | 294 | NAZE/FUNCHATOGE      | Japan     | 1957/2016 | 1957-2016 | 43775 |
| JAM00047918 | 24°20'N | 124°10'E | 6   | ISHIGAKIJIMA         | Japan     | 1964/2016 | 1964-2016 | 37967 |
| JAM00047931 | 26°21'N | 127°45'E | 45  | KADENA AB            | Japan     | 1948/1990 | 1948-1971 | 23705 |
| JAM00047936 | 26°12'N | 127°41'E | 27  | NAHA                 | Japan     | 1973/2008 | 1973-2008 | 26210 |
| JAM00047945 | 25°50'N | 131°14'E | 15  | MINAMIDAITOJIMA      | Japan     | 1961/2016 | 1961-2016 | 40511 |
| JAM00047963 | 30°29'N | 140°18'E | 83  | TORISHIMA            | Japan     | 1956/1965 | 1956-1965 | 6556  |
| JAM00047971 | 27° 6'N | 142°11'E | 3   | CHICHIJIMA           | Japan     | 1967/2016 | 1967-2016 | 34890 |
| JAM00047981 | 24°47'N | 141°20'E | 106 | IWOTO                | Japan     | 1948/2008 | 1948-1967 | 12453 |
|             |         |          |     |                      |           |           | 1991-2008 | 1499  |
| JAM00047991 | 24°17'N | 153°59'E | 7   | MINAMITORISHIMA      | Japan     | 1951/2016 | 1951-1954 | 2801  |
|             |         |          |     |                      |           |           | 1956-2016 | 42799 |
| JMM00078397 | 18° 4'N | 76°51'W  | 786 | COOPERS HILL         | Jamaica   | 1956/2016 | 1956-2012 | 32215 |
|             |         |          |     |                      |           |           | 2014-2016 | 977   |
| JNM00001001 | 70°56'N | 8°40'W   | 9   | JAN MAYEN            | Jan Mayen | 1949/2016 | 1949-2016 | 45480 |

|             |         |          |      |                              |                |           |           |       |
|-------------|---------|----------|------|------------------------------|----------------|-----------|-----------|-------|
| JNM00001005 | 78° 4'N | 13°38'E  | 9    | ISFJORD RADIO                | Jan Mayen      | 1957/1961 | 1957-1961 | 1265  |
| JNM00001020 | 80° 3'N | 18°18'E  | 7    | KINNVIKA STATION             | Jan Mayen      | 1957/1958 | 1957-1958 | 258   |
| JOM00040265 | 32°22'N | 36°15'E  | 683  | MAFRAQ                       | Jordan         | 1963/2016 | 1963-2016 | 17016 |
| JQM00091275 | 16°44'N | 169°31'W | 3    | JOHNSTON IS WSO AP           | Johnston Atoll | 1946/1984 | 1946-1984 | 26232 |
| KEM00063612 | 3° 7'N  | 35°37'E  | 515  | LODWAR                       | Kenya          | 1973/1998 | 1998-1998 | 115   |
| KEM00063710 | 0°22'S  | 35°16'E  | 1976 | KERICHO                      | Kenya          | 1975/1996 | 1975-1980 | 280   |
| KEM00063723 | 0°28'S  | 39°38'E  | 138  | GARISSA                      | Kenya          | 1973/1999 | 1975-1990 | 3656  |
|             |         |          |      |                              |                |           | 1997-1997 | 117   |
|             |         |          |      |                              |                |           | 1999-1999 | 73    |
| KEM00063741 | 1°18'S  | 36°46'E  | 1798 | DAGORETTI CORNER             | Kenya          | 1949/2016 | 1957-1957 | 151   |
|             |         |          |      |                              |                |           | 1971-2016 | 20022 |
| KGM00036974 | 41°26'N | 76° 0'E  | 2041 | NARYN                        | Kyrgyzstan     | 1967/1992 | 1967-1968 | 402   |
|             |         |          |      |                              |                |           | 1973-1992 | 9061  |
| KGM00038353 | 42°50'N | 74°35'E  | 760  | BISHKEK                      | Kyrgyzstan     | 1956/2007 | 1956-1956 | 192   |
|             |         |          |      |                              |                |           | 1960-1993 | 21614 |
|             |         |          |      |                              |                |           | 1996-2003 | 1236  |
|             |         |          |      |                              |                |           | 2007-2007 | 97    |
| KGM00038613 | 40°55'N | 72°57'E  | 765  | DZHALAL-ABAD                 | Kyrgyzstan     | 1958/1992 | 1958-1992 | 24293 |
| KNM00047041 | 39°56'N | 127°33'E | 39   | HAMHEUNG                     | North Korea    | 1978/2015 | 1978-1996 | 11768 |
|             |         |          |      |                              |                |           | 2015-2015 | 33    |
| KNM00047058 | 39° 2'N | 125°47'E | 36   | PYONGYANG                    | North Korea    | 1957/2016 | 1957-2016 | 28717 |
| KRM00091487 | 3°51'N  | 159°22'W | 5    | FANNING ISLAND               | Kiribati       | 1978/1979 | 1978-1979 | 86    |
| KRM00091492 | 2° 0'N  | 157°24'W | 3    | CHRISTMAS ISLAND             | Kiribati       | 1962/2001 | 1962-1962 | 446   |
| KRM00091610 | 1°21'N  | 172°55'E | 2    | TARAWA                       | Kiribati       | 1958/2016 | 1958-1958 | 403   |
|             |         |          |      |                              |                |           | 1973-2016 | 12389 |
| KRM00091701 | 2°46'S  | 171°43'W | 3    | KANTON ISLAND                | Kiribati       | 1943/1992 | 1948-1967 | 12320 |
|             |         |          |      |                              |                |           | 1971-1972 | 464   |
|             |         |          |      |                              |                |           | 1989-1992 | 788   |
| KSM00047090 | 38°15'N | 128°34'E | 19   | SOKCHO                       | South Korea    | 2001/2015 | 2001-2015 | 10880 |
| KSM00047102 | 37°58'N | 124°38'E | 146  | BAENGNYEONGDO                | South Korea    | 1973/2016 | 2000-2016 | 12216 |
| KSM00047104 | 37°53'N | 127°43'E | 76   | CAMP PAGE                    | South Korea    | 1970/1972 | 1970-1972 | 282   |
| KSM00047110 | 37°34'N | 126°47'E | 17   | GIMPO INTL AIRPORT           | South Korea    | 1945/1990 | 1945-1948 | 696   |
|             |         |          |      |                              |                |           | 1950-1957 | 8156  |
| KSM00047122 | 37° 5'N | 127° 2'E | 12   | OSAN AB                      | South Korea    | 1957/2016 | 1957-2016 | 75705 |
| KSM00047138 | 36° 2'N | 129°23'E | 3    | POHANG                       | South Korea    | 1967/2016 | 1967-1967 | 75    |
|             |         |          |      |                              |                |           | 1969-2016 | 32544 |
| KSM00047158 | 35° 7'N | 126°48'E | 13   | GWANGJU AB                   | South Korea    | 1973/2016 | 1977-2016 | 40407 |
| KSM00047161 | 35° 5'N | 128° 5'E | 8    | SACHEON AB                   | South Korea    | 1952/2000 | 1952-1954 | 1781  |
| KSM00047169 | 34°41'N | 125°27'E | 77   | HEUKSANDO                    | South Korea    | 2003/2016 | 2003-2016 | 9936  |
| KSM00047185 | 33°18'N | 126°10'E | 75   | GOSAN                        | South Korea    | 1988/2016 | 1988-2016 | 21007 |
| KSM00047187 | 33°14'N | 126°15'E | 27   | MOESULPO AB                  | South Korea    | 1954/1985 | 1954-1976 | 15231 |
| KUM00040582 | 29°15'N | 47°58'E  | 56   | KUWAIT INTERNATIONAL AIRPORT | Kuwait         | 1983/2016 | 1983-2016 | 20437 |
| KZM00028951 | 53°14'N | 63°37'E  | 171  | KOSTANAI                     | Kazakhstan     | 1950/2016 | 1950-2003 | 36272 |
|             |         |          |      |                              |                |           | 2005-2016 | 7725  |
| KZM00035108 | 51°15'N | 51°24'E  | 36   | URALSK                       | Kazakhstan     | 1950/1996 | 1950-1989 | 27950 |
|             |         |          |      |                              |                |           | 1992-1996 | 1504  |
| KZM00035229 | 50°17'N | 57° 9'E  | 219  | AKTOBE                       | Kazakhstan     | 1946/2016 | 1946-2016 | 51132 |
| KZM00035361 | 50° 8'N | 65°14'E  | 142  | AMANGELDY                    | Kazakhstan     | 1962/1989 | 1962-1989 | 15449 |
| KZM00035394 | 49°48'N | 73° 9'E  | 553  | KARAGANDA                    | Kazakhstan     | 1946/2016 | 1946-1994 | 38294 |
|             |         |          |      |                              |                |           | 1996-2016 | 10795 |

[illegible]

|             |         |          |      |                     |            |           |           |       |
|-------------|---------|----------|------|---------------------|------------|-----------|-----------|-------|
|             |         |          |      |                     |            |           | 1996-1997 | 125   |
| LYM00062124 | 27° 1'N | 14°27'E  | 435  | SEBHA               | Libya      | 1975/2011 | 1975-1991 | 3004  |
|             |         |          |      |                     |            |           | 1993-1993 | 32    |
|             |         |          |      |                     |            |           | 2000-2000 | 69    |
|             |         |          |      |                     |            |           | 2005-2008 | 682   |
|             |         |          |      |                     |            |           | 2010-2011 | 195   |
| LYM00062271 | 24°13'N | 23°18'E  | 436  | KUFRA               | Libya      | 1973/1989 | 1973-1989 | 1786  |
| MAM00067009 | 12°21'S | 49°18'E  | 114  | ANTSIRANANA         | Madagascar | 1973/2001 | 1977-1980 | 308   |
| MAM00067083 | 18°48'S | 47°29'E  | 1279 | ANTANANARIVO/IVATO  | Madagascar | 1967/2016 | 1967-2014 | 20801 |
|             |         |          |      |                     |            |           | 2016-2016 | 272   |
| MAM00067085 | 18°54'S | 47°32'E  | 1310 | TANANARIVE/SCM      | Madagascar | 1952/1966 | 1952-1966 | 4210  |
| MAM00067197 | 25° 2'S | 46°57'E  | 8    | TAOLAGNARO          | Madagascar | 1972/2016 | 1972-2007 | 10867 |
|             |         |          |      |                     |            |           | 2009-2014 | 2283  |
|             |         |          |      |                     |            |           | 2016-2016 | 147   |
| MDM00033815 | 47° 1'N | 28°52'E  | 170  | KISINEV             | Moldova    | 1949/2002 | 1950-1998 | 36717 |
|             |         |          |      |                     |            |           | 2002-2002 | 30    |
| MGM00044212 | 49°48'N | 92° 5'E  | 940  | ULAANGOM            | Mongolia   | 1971/2016 | 1971-2016 | 18800 |
| MGM00044231 | 49°38'N | 100°10'E | 1285 | MUREN               | Mongolia   | 1971/2016 | 1971-2016 | 19220 |
| MGM00044259 | 48° 5'N | 114°33'E | 747  | CHOIBALSAN          | Mongolia   | 1973/2013 | 1974-1995 | 10782 |
|             |         |          |      |                     |            |           | 2001-2005 | 430   |
|             |         |          |      |                     |            |           | 2013-2013 | 190   |
| MGM00044272 | 47°45'N | 96°51'E  | 1759 | ULIASTAI            | Mongolia   | 1973/1982 | 1981-1982 | 3     |
| MGM00044277 | 46°24'N | 96°15'E  | 2182 | ALTAI               | Mongolia   | 1970/2013 | 1970-2003 | 14092 |
|             |         |          |      |                     |            |           | 2005-2006 | 122   |
|             |         |          |      |                     |            |           | 2012-2013 | 462   |
| MGM00044282 | 47°27'N | 101°28'E | 1691 | TSETSERLEG          | Mongolia   | 1973/1982 | 1982-1982 | 3     |
| MGM00044288 | 46°16'N | 102°47'E | 1813 | ARVAIHEER           | Mongolia   | 1973/2013 | 1975-2002 | 12079 |
|             |         |          |      |                     |            |           | 2006-2006 | 38    |
|             |         |          |      |                     |            |           | 2012-2013 | 492   |
| MGM00044292 | 47°55'N | 106°52'E | 1729 | ULAANBAATAR         | Mongolia   | 1956/2016 | 1956-2016 | 35841 |
| MGM00044354 | 44°54'N | 110° 7'E | 938  | SAINSHAND           | Mongolia   | 1957/1990 | 1957-1990 | 17023 |
| MGM00044373 | 43°35'N | 104°25'E | 1465 | DALANZADGAD         | Mongolia   | 1959/2016 | 1959-1996 | 15578 |
|             |         |          |      |                     |            |           | 2000-2001 | 285   |
|             |         |          |      |                     |            |           | 2011-2016 | 3453  |
| MIM00067586 | 13°47'S | 33°46'E  | 1229 | LILONGWE INTL AIRPO | Malawi     | 1982/2002 | 1982-1984 | 65    |
|             |         |          |      |                     |            |           | 1986-1991 | 242   |
| MIM00067587 | 13°46'S | 33°42'E  | 1135 | LILONGWE            | Malawi     | 1968/1982 | 1977-1981 | 1174  |
| MKM00013586 | 41°57'N | 21°38'E  | 233  | SKOPJE- AIRPORT     | Macedonia  | 1973/2008 | 1973-1974 | 43    |
|             |         |          |      |                     |            |           | 1982-1982 | 288   |
|             |         |          |      |                     |            |           | 1985-1985 | 34    |
|             |         |          |      |                     |            |           | 1996-1997 | 169   |
|             |         |          |      |                     |            |           | 2000-2008 | 1330  |
| MLM00061202 | 20°12'N | 0°59'E   | 494  | TESSALIT            | Mali       | 1948/2010 | 1974-1976 | 89    |
|             |         |          |      |                     |            |           | 1978-1981 | 125   |
|             |         |          |      |                     |            |           | 1983-1984 | 10    |
|             |         |          |      |                     |            |           | 2007-2007 | 66    |
|             |         |          |      |                     |            |           | 2009-2010 | 116   |
| MLM00061223 | 16°43'N | 3° 0'W   | 263  | TOMBOUCTOU          | Mali       | 1973/2012 | 1973-2000 | 4485  |
|             |         |          |      |                     |            |           | 2005-2012 | 996   |
| MLM00061290 | 12°38'N | 8° 2'W   | 343  | BAMAKO              | Mali       | 1940/1972 | 1966-1972 | 1716  |

|             |         |          |      |                                |                |           |           |       |
|-------------|---------|----------|------|--------------------------------|----------------|-----------|-----------|-------|
| MLM00061291 | 12°32'N | 7°57'W   | 380  | BAMAKO/SENOU                   | Mali           | 1975/2016 | 1975-2016 | 20959 |
| MOM00060119 | 34°18'N | 6°36'W   | 12   | KENITRA PORT LYAUTEY           | Morocco        | 1948/1970 | 1948-1970 | 12045 |
| MOM00060155 | 33°34'N | 7°40'W   | 56   | CASABLANCA                     | Morocco        | 1949/2016 | 1949-1952 | 1436  |
|             |         |          |      |                                |                |           | 1964-2016 | 16178 |
| MOM00060191 | 32°22'N | 6°24'W   | 468  | BENI-MELLAL                    | Morocco        | 1986/2005 | 1986-1996 | 2253  |
|             |         |          |      |                                |                |           | 2000-2002 | 163   |
|             |         |          |      |                                |                |           | 2005-2005 | 30    |
| MOM00060250 | 30°23'N | 9°34'W   | 23   | AGADIR INEZGANNE               | Morocco        | 1969/1991 | 1969-1969 | 74    |
|             |         |          |      |                                |                |           | 1971-1987 | 4283  |
| MOM00060252 | 30°20'N | 9°25'W   | 74   | AGADIR AL MASSIRA              | Morocco        | 1992/2003 | 1992-1998 | 1846  |
|             |         |          |      |                                |                |           | 2000-2003 | 1096  |
| MOXUAC00132 | 34° 3'N | 6°46'W   | 79   | RABAT                          | Morocco        | 1941/1949 | 1948-1949 | 421   |
| MPM00061995 | 20°18'S | 57°30'E  | 423  | VACOAS (MAURITIUS)             | Mauritius      | 1966/2016 | 1966-1980 | 2260  |
|             |         |          |      |                                |                |           | 1996-2015 | 3883  |
| MQM00091066 | 28°12'N | 177°23'W | 6    | MIDWAY IS NAS                  | Midway Islands | 1947/1991 | 1947-1991 | 33186 |
| MRM00061401 | 25°14'N | 11°37'W  | 364  | BIR MOGHREIN                   | Mauritania     | 1951/1989 | 1951-1964 | 4171  |
| MRM00061415 | 20°56'N | 17° 2'W  | 5    | NOUADHIBOU                     | Mauritania     | 1940/2016 | 1968-1990 | 6203  |
|             |         |          |      |                                |                |           | 1992-2001 | 1392  |
|             |         |          |      |                                |                |           | 2006-2014 | 1482  |
|             |         |          |      |                                |                |           | 2016-2016 | 24    |
| MRM00061442 | 18° 6'N | 15°57'W  | 2    | NOUAKCHOTT                     | Mauritania     | 1941/2016 | 1999-2016 | 4188  |
| MTM00016597 | 35°51'N | 14°29'E  | 91   | LUQA                           | Malta          | 1949/2000 | 1949-1972 | 10362 |
| MUM00041256 | 23°36'N | 58°18'E  | 8    | MUSCAT INT'L AIRPORT           | Oman           | 1983/2016 | 1983-1990 | 3850  |
|             |         |          |      |                                |                |           | 1992-2016 | 8266  |
| MUM00041316 | 17° 3'N | 54° 6'E  | 23   | SALALAH AIRPORT                | Oman           | 1983/2016 | 1983-2016 | 6890  |
| MVM00043555 | 4°12'N  | 73°32'E  | 2    | MALE                           | Maldives       | 1981/2011 | 2006-2007 | 108   |
|             |         |          |      |                                |                |           | 2011-2011 | 281   |
| MVM00043599 | 0°42'S  | 73° 9'E  | 2    | GAN                            | Maldives       | 1961/2016 | 1961-1963 | 593   |
|             |         |          |      |                                |                |           | 2005-2016 | 3410  |
| MXM00076151 | 28°53'N | 118°18'W | 23   | ISLA GUADALUPE                 | Mexico         | 1971/1998 | 1971-1988 | 11520 |
|             |         |          |      |                                |                |           | 1998-1998 | 28    |
| MXM00076225 | 28°40'N | 106° 2'W | 1472 | CHIHUAHUA                      | Mexico         | 1964/2016 | 1964-2016 | 27101 |
| MXM00076256 | 27°57'N | 110°48'W | 12   | EMPALME                        | Mexico         | 1964/2016 | 1964-2004 | 22985 |
|             |         |          |      |                                |                |           | 2006-2016 | 1997  |
| MXM00076382 | 25°32'N | 103°27'W | 1150 | TORREON AIRPORT                | Mexico         | 1994/2004 | 1994-1999 | 1275  |
|             |         |          |      |                                |                |           | 2004-2004 | 253   |
| MXM00076394 | 25°52'N | 100°14'W | 448  | AEROP. INTERN. MONTERREY,      | Mexico         | 1964/2016 | 1964-2016 | 25470 |
| MXM00076405 | 24° 7'N | 110°19'W | 18   | LA PAZ                         | Mexico         | 1975/2016 | 1991-2016 | 8262  |
| MXM00076458 | 23°13'N | 106°24'W | 3    | COLONIA JUAN CARRASCO MAZATLAN | Mexico         | 1948/2016 | 1948-2016 | 31688 |
| MXM00076491 | 23°44'N | 99° 7'W  | 336  | CIUDAD VICTORIA                | Mexico         | 1948/1951 | 1948-1951 | 1365  |
| MXM00076526 | 22°45'N | 102°30'W | 2265 | ZACATECAS,ZAC.                 | Mexico         | 2000/2016 | 2000-2016 | 5390  |
| MXM00076595 | 21° 1'N | 86°51'W  | 9    | CANCUN                         | Mexico         | 1995/2016 | 1995-2005 | 3218  |
|             |         |          |      |                                |                |           | 2009-2016 | 2835  |
| MXM00076612 | 20°42'N | 103°23'W | 1551 | GUADALAJARA                    | Mexico         | 1979/2016 | 1979-2016 | 11439 |
| MXM00076644 | 20°57'N | 89°39'W  | 11   | AEROP.INTERNACIONAL MERIDA     | Mexico         | 1948/2016 | 1948-2016 | 37058 |
| MXM00076654 | 19° 4'N | 104°20'W | 3    | MANZANILLO                     | Mexico         | 1976/2016 | 1976-2016 | 15881 |
| MXM00076679 | 19°26'N | 99° 8'W  | 2235 | AEROP. INTERNACIONAL MEXICO    | Mexico         | 1948/2016 | 1948-2016 | 39024 |
| MXM00076692 | 19° 9'N | 96° 8'W  | 19   | HACIENDA YLANG VERACRUZ        | Mexico         | 1952/2016 | 1952-2016 | 30162 |
| MXM00076723 | 18°43'N | 110°57'W | 35   | ISLA SOCORRO                   | Mexico         | 1973/2007 | 1973-1990 | 4956  |
|             |         |          |      |                                |                |           | 1994-2007 | 2642  |

[illegible]

|             |          |           |      |                              |              |           |           |       |
|-------------|----------|-----------|------|------------------------------|--------------|-----------|-----------|-------|
| NLM00006235 | 52° 56'N | 4° 47'E   | 1    | DE KOOIJ VK                  | Netherlands  | 1921/2014 | 2000-2001 | 80    |
|             |          |           |      |                              |              |           | 2004-2014 | 2649  |
| NLM00006260 | 52° 6'N  | 5° 11'E   | 2    | DE BILT AWS                  | Netherlands  | 1911/2016 | 1949-2016 | 55378 |
| NNM00078866 | 18° 2'N  | 63° 7'W   | 3    | JULIANA AIRPORT              | Sint Maarten | 1956/2016 | 1956-2016 | 24001 |
| NOM00001010 | 69° 19'N | 16° 8'E   | 10   | ANDOYA                       | Norway       | 2014/2016 | 2014-2016 | 1380  |
| NOM00001030 | 69° 42'N | 19° 1'E   | 12   | TROMSO                       | Norway       | 1939/1959 | 1949-1959 | 3090  |
| NOM00001152 | 67° 17'N | 14° 27'E  | 31   | BODO                         | Norway       | 1942/2014 | 1957-2014 | 37861 |
| NOM00001241 | 63° 42'N | 9° 37'E   | 10   | ORLAND III                   | Norway       | 1959/2016 | 1959-2016 | 38085 |
| NOM00001384 | 60° 12'N | 11° 5'E   | 201  | OSLO/GARDERMOEN              | Norway       | 1949/2001 | 1949-2001 | 27699 |
| NOM00001400 | 56° 33'N | 3° 13'E   | 52   | EKOFISK                      | Norway       | 1994/2016 | 1994-2016 | 13961 |
| NOM00001415 | 58° 52'N | 5° 40'E   | 37   | STAVANGER/SOLA               | Norway       | 1949/2016 | 1949-2016 | 41994 |
| NOM00001492 | 59° 57'N | 10° 43'E  | 95   | OSLO-BLINDERN                | Norway       | 2001/2016 | 2001-2003 | 863   |
|             |          |           |      |                              |              |           | 2016-2016 | 30    |
| NOXUAC04176 | 60° 23'N | 5° 20'E   | 36   | BERGEN                       | Norway       | 1940/1942 | -         | 0     |
| NOXUAC04178 | 68° 28'N | 17° 30'E  | 23   | NARVIK                       | Norway       | 1940/1941 | -         | 0     |
| NOXUAE05479 | 59° 58'N | 11° 2'E   | 106  | KJELLER                      | Norway       | 1930/1944 | 1930-1931 | 156   |
| NPM00044454 | 27° 42'N | 85° 22'E  | 1337 | KATHMANDU AIRPORT            | Nepal        | 1977/1980 | 1977-1980 | 648   |
| NRM00091532 | 0° 31'S  | 166° 55'E | 7    | NAURU ARC-2                  | Nauru        | 1951/2013 | 1951-1951 | 30    |
|             |          |           |      |                              |              |           | 2002-2002 | 83    |
|             |          |           |      |                              |              |           | 2007-2013 | 3887  |
| NUM00078741 | 12° 9'N  | 86° 10'W  | 56   | MANAGUA A.C.SANDINO          | Nicaragua    | 1947/2007 | 1947-1949 | 1624  |
|             |          |           |      |                              |              |           | 2005-2005 | 2     |
| NZM00093012 | 35° 6'S  | 173° 16'E | 54   | KAITIA                       | New Zealand  | 1985/1996 | 1985-1995 | 6466  |
| NZM00093112 | 36° 48'S | 174° 37'E | 30   | WHENUAPAI                    | New Zealand  | 1957/2016 | 1957-1961 | 1504  |
|             |          |           |      |                              |              |           | 1995-2016 | 15471 |
| NZM00093115 | 36° 51'S | 174° 47'E | 5    | AUCKLAND                     | New Zealand  | 1949/1957 | 1949-1957 | 2915  |
| NZM00093119 | 37° 1'S  | 174° 48'E | 6    | AUCKLAND AIRPORT             | New Zealand  | 1967/1988 | 1967-1985 | 12106 |
| NZM00093337 | 39° 28'S | 175° 41'E | 821  | WAIOURU                      | New Zealand  | 1968/1972 | 1968-1972 | 1075  |
| NZM00093417 | 40° 54'S | 174° 59'E | 6    | PARAPARAUMU AERODROME        | New Zealand  | 1973/2016 | 1987-2016 | 20929 |
| NZM00093614 | 42° 43'S | 170° 59'E | 45   | HOKITIKA AERODROME           | New Zealand  | 1973/2012 | 1984-2000 | 172   |
|             |          |           |      |                              |              |           | 2002-2002 | 1     |
|             |          |           |      |                              |              |           | 2004-2006 | 13    |
| NZM00093780 | 43° 29'S | 172° 33'E | 30   | CHRISTCHURCH                 | New Zealand  | 1954/1996 | 1954-1962 | 3090  |
|             |          |           |      |                              |              |           | 1966-1987 | 8978  |
|             |          |           |      |                              |              |           | 1996-1996 | 7     |
| NZM00093844 | 46° 25'S | 168° 19'E | 2    | INVERCARGILL AIRPORT         | New Zealand  | 1950/2016 | 1950-1962 | 4689  |
|             |          |           |      |                              |              |           | 1966-2016 | 34701 |
| NZM00093944 | 52° 33'S | 169° 9'E  | 15   | CAMPBELL ISLAND              | New Zealand  | 1957/1993 | 1957-1962 | 2402  |
|             |          |           |      |                              |              |           | 1966-1972 | 2419  |
|             |          |           |      |                              |              |           | 1990-1993 | 2569  |
| NZM00093986 | 43° 57'S | 176° 34'W | 44   | CHATHAM ISL/TUUTA            | New Zealand  | 1956/2011 | 1956-1962 | 2267  |
|             |          |           |      |                              |              |           | 1968-2011 | 14507 |
| NZM00093997 | 29° 15'S | 177° 56'W | 48   | RAOUL ISLAND                 | New Zealand  | 1952/2016 | 1952-1962 | 3754  |
|             |          |           |      |                              |              |           | 1967-1980 | 5881  |
|             |          |           |      |                              |              |           | 1988-2016 | 9689  |
| ODM00062840 | 9° 33'N  | 31° 39'E  | 388  | MALKAL                       | South Sudan  | 1935/1981 | 1960-1963 | 1012  |
|             |          |           |      |                              |              |           | 1973-1979 | 236   |
| PAM00086218 | 25° 14'S | 57° 31'W  | 83   | AEROPUERTO SILVIO PETTIROSSI | Paraguay     | 1975/2016 | 1975-1981 | 1010  |

|             |         |          |      |                       |                 |           |           |       |
|-------------|---------|----------|------|-----------------------|-----------------|-----------|-----------|-------|
| PEM00084377 | 3°47'S  | 73°18'W  | 126  | IQUITOS               | Peru            | 1973/1980 | 1975-1980 | 625   |
| PEM00084378 | 3°44'S  | 73°15'W  | 117  | MORONA                | Peru            | 2003/2010 | 2003-2010 | 647   |
| PEM00084416 | 5°11'S  | 80°36'W  | 52   | PIURA GRUP7           | Peru            | 2003/2011 | 2003-2009 | 437   |
|             |         |          |      |                       |                 |           | 2011-2011 | 51    |
| PEM00084628 | 12° 1'S | 77° 7'W  | 12   | LIMA/CALLAO           | Peru            | 1957/2016 | 1957-1990 | 10509 |
|             |         |          |      |                       |                 |           | 1992-2005 | 2448  |
|             |         |          |      |                       |                 |           | 2009-2014 | 1123  |
|             |         |          |      |                       |                 |           | 2016-2016 | 49    |
| PEM00084629 | 12° 9'S | 77° 0'W  | 80   | LAS PALMAS            | Peru            | 2009/2010 | 2009-2010 | 387   |
| PFM00059981 | 16°50'N | 112°20'E | 5    | XISHA DAO             | Paracel Islands | 1958/2016 | 1958-2016 | 39157 |
| PKM00041529 | 34° 2'N | 71°56'E  | 329  | PESHAWAR              | Pakistan        | 1926/2016 | 1945-1947 | 506   |
|             |         |          |      |                       |                 |           | 1957-1964 | 1830  |
|             |         |          |      |                       |                 |           | 1967-1968 | 118   |
|             |         |          |      |                       |                 |           | 1970-1998 | 4642  |
|             |         |          |      |                       |                 |           | 2000-2001 | 108   |
|             |         |          |      |                       |                 |           | 2014-2014 | 2     |
| PKM00041594 | 32° 3'N | 72°40'E  | 188  | SARGODHA              | Pakistan        | 1970/2007 | 1970-2000 | 3140  |
|             |         |          |      |                       |                 |           | 2002-2002 | 223   |
|             |         |          |      |                       |                 |           | 2005-2007 | 425   |
| PKM00041640 | 31°33'N | 74°20'E  | 214  | LAHORE CITY           | Pakistan        | 1960/2016 | 1960-1964 | 1173  |
|             |         |          |      |                       |                 |           | 1967-1967 | 111   |
|             |         |          |      |                       |                 |           | 1991-1999 | 1220  |
|             |         |          |      |                       |                 |           | 2006-2006 | 76    |
|             |         |          |      |                       |                 |           | 2009-2015 | 392   |
| PKM00041661 | 30°16'N | 66°55'E  | 1620 | QUETTA (SHEIKH MANDA) | Pakistan        | 1926/2016 | 1954-1954 | 42    |
|             |         |          |      |                       |                 |           | 1961-1963 | 184   |
|             |         |          |      |                       |                 |           | 1967-1968 | 63    |
|             |         |          |      |                       |                 |           | 1973-1995 | 2141  |
| PKM00041675 | 30°12'N | 71°26'E  | 122  | MULTAN                | Pakistan        | 1940/2016 | 1945-1946 | 180   |
|             |         |          |      |                       |                 |           | 1967-1990 | 2523  |
| PKM00041739 | 26°58'N | 64° 6'E  | 980  | PANJGUR               | Pakistan        | 1973/2016 | 1990-1990 | 61    |
| PKM00041756 | 25° 4'N | 61°48'E  | 56   | JIWANI                | Pakistan        | 1938/2016 | 1945-1945 | 46    |
|             |         |          |      |                       |                 |           | 1958-1958 | 47    |
|             |         |          |      |                       |                 |           | 1967-1967 | 53    |
|             |         |          |      |                       |                 |           | 1973-1979 | 468   |
|             |         |          |      |                       |                 |           | 1982-1982 | 3     |
|             |         |          |      |                       |                 |           | 1989-1990 | 3     |
| PKM00041780 | 24°54'N | 67° 8'E  | 21   | KARACHI AIRPORT       | Pakistan        | 1926/2016 | 1945-1947 | 589   |
|             |         |          |      |                       |                 |           | 1952-1954 | 564   |
|             |         |          |      |                       |                 |           | 1961-1963 | 822   |
|             |         |          |      |                       |                 |           | 1965-2002 | 8387  |
|             |         |          |      |                       |                 |           | 2004-2012 | 1219  |
| PLM00012105 | 54°12'N | 16°11'E  | 34   | KOSZALIN              | Poland          | 1965/1971 | 1965-1971 | 1537  |
| PLM00012120 | 54°45'N | 17°32'E  | 2    | LEBA                  | Poland          | 1972/2016 | 1972-2016 | 28127 |
| PLM00012330 | 52°25'N | 16°51'E  | 84   | POZNAN                | Poland          | 1959/1992 | 1959-1992 | 19982 |
| PLM00012374 | 52°24'N | 20°57'E  | 94   | LEGIONOWO             | Poland          | 1956/2016 | 1956-2016 | 42822 |
| PLM00012375 | 52°11'N | 20°58'E  | 65   | WARSZAWA              | Poland          | 1920/1956 | 1949-1956 | 1552  |
| PLM00012425 | 51° 7'N | 16°53'E  | 120  | WROCLAW I             | Poland          | 1956/2016 | 1956-2016 | 35658 |
| PLXUAC03751 | 50°17'N | 21°26'E  | 167  | MIELEC                | Poland          | 1957/1960 | -         | 0     |
| PMM00078807 | 8°58'N  | 79°34'W  | 7    | COROZAL OESTE         | Panama          | 1946/2016 | 1946-1972 | 20715 |



[illegible]

[illegible]

|             |         |          |     |                        |        |           |           |       |
|-------------|---------|----------|-----|------------------------|--------|-----------|-----------|-------|
| RSM00020667 | 73°20'N | 70° 2'E  | 6   | IM POPOVA              | Russia | 1953/1995 | 1954-1954 | 4     |
|             |         |          |     |                        |        |           | 1961-1965 | 1103  |
|             |         |          |     |                        |        |           | 1967-1981 | 9320  |
|             |         |          |     |                        |        |           | 1993-1995 | 793   |
| RSM00020674 | 73°31'N | 80°24'E  | 42  | OSTROV DIKSON          | Russia | 1938/2016 | 1938-1938 | 14    |
|             |         |          |     |                        |        |           | 1940-2016 | 40797 |
| RSM00020744 | 72°22'N | 52°42'E  | 18  | MALYE KARMAKULY        | Russia | 1950/2016 | 1950-1961 | 3784  |
|             |         |          |     |                        |        |           | 1967-2016 | 28272 |
| RSM00020891 | 71°59'N | 102°28'E | 31  | HATANGA                | Russia | 1949/2012 | 1949-1980 | 18945 |
|             |         |          |     |                        |        |           | 1983-1998 | 10534 |
|             |         |          |     |                        |        |           | 2001-2012 | 3963  |
| RSM00021358 | 76° 9'N | 152°50'E | 14  | OSTROV ZOHOVA          | Russia | 1958/1991 | 1958-1962 | 2053  |
|             |         |          |     |                        |        |           | 1965-1991 | 16815 |
| RSM00021432 | 76° 0'N | 137°52'E | 12  | OSTROV KOTEL'NYJ       | Russia | 1946/2016 | 1946-1946 | 58    |
|             |         |          |     |                        |        |           | 1948-1949 | 173   |
|             |         |          |     |                        |        |           | 1954-2000 | 32370 |
|             |         |          |     |                        |        |           | 2010-2016 | 4220  |
| RSM00021504 | 74°40'N | 112°56'E | 60  | OSTROV PREOBRAZHENIA   | Russia | 1958/1996 | 1958-1996 | 26376 |
| RSM00021647 | 73°12'N | 143°32'E | 24  | MYS SHALAUROVA         | Russia | 1958/1995 | 1958-1995 | 26289 |
| RSM00021824 | 71°35'N | 128°55'E | 6   | TIKSI                  | Russia | 1939/2016 | 1939-1943 | 356   |
|             |         |          |     |                        |        |           | 1946-2016 | 44660 |
| RSM00021946 | 70°37'N | 147°53'E | 44  | CHOKURDAH              | Russia | 1955/2016 | 1957-1957 | 1     |
|             |         |          |     |                        |        |           | 1961-1982 | 11213 |
|             |         |          |     |                        |        |           | 1993-2016 | 13102 |
| RSM00021965 | 70°38'N | 162°24'E | 38  | OSTROV CHETYREKHSTOLBO | Russia | 1924/1994 | 1938-1938 | 48    |
|             |         |          |     |                        |        |           | 1940-1942 | 255   |
|             |         |          |     |                        |        |           | 1948-1949 | 210   |
|             |         |          |     |                        |        |           | 1951-1994 | 29741 |
| RSM00021982 | 70°58'N | 178°39'W | 4   | OSTROV VRANGEL'YA      | Russia | 1954/1999 | 1957-1999 | 28393 |
| RSM00022113 | 68°59'N | 33° 7'E  | 121 | MURMANSK               | Russia | 1939/2016 | 1947-2016 | 54450 |
| RSM00022165 | 68°39'N | 43°18'E  | 48  | KANIN NOS              | Russia | 1953/1962 | 1953-1962 | 1994  |
| RSM00022217 | 67°10'N | 32°21'E  | 26  | KANDALAKSHA            | Russia | 1957/2016 | 1957-2016 | 39031 |
| RSM00022271 | 67°53'N | 44°10'E  | 5   | SHOJNA                 | Russia | 1963/2016 | 1963-2016 | 32562 |
| RSM00022522 | 64°57'N | 34°39'E  | 8   | KEM                    | Russia | 1950/2016 | 1950-2016 | 38933 |
| RSM00022543 | 64°37'N | 40°31'E  | 4   | ARHANGEL'SK            | Russia | 1939/2016 | 1946-2016 | 57178 |
| RSM00022802 | 61°43'N | 30°43'E  | 18  | SORTAVALA              | Russia | 1920/1990 | 1949-1990 | 24900 |
| RSM00022820 | 61°49'N | 34°16'E  | 110 | PETROZAVODSK           | Russia | 1957/2016 | 1957-2001 | 29108 |
|             |         |          |     |                        |        |           | 2005-2016 | 7723  |
| RSM00022845 | 61°30'N | 38°56'E  | 124 | KARGOPOL               | Russia | 1962/2016 | 1962-2016 | 24321 |
| RSM00023022 | 69°47'N | 61°47'E  | 49  | AMDERMA                | Russia | 1947/1998 | 1947-1998 | 33006 |
| RSM00023074 | 69°24'N | 86°10'E  | 28  | DUDINKA                | Russia | 1951/1960 | 1951-1960 | 4328  |
| RSM00023078 | 69°21'N | 88°16'E  | 60  | NORIL'SK               | Russia | 1975/2016 | 1975-1995 | 15572 |
|             |         |          |     |                        |        |           | 1998-2016 | 11063 |
| RSM00023146 | 68°28'N | 73°36'E  | 2   | MYS KAMENNY            | Russia | 1955/1991 | 1955-1991 | 26408 |
| RSM00023205 | 67°38'N | 53° 1'E  | 5   | NAR'JAN-MAR            | Russia | 1946/2016 | 1946-2016 | 48067 |
| RSM00023274 | 67°28'N | 86°34'E  | 30  | IGARKA                 | Russia | 1950/1974 | 1950-1974 | 11702 |
| RSM00023330 | 66°32'N | 66°40'E  | 15  | SALEHARD               | Russia | 1948/2016 | 1948-2016 | 49741 |
| RSM00023415 | 65° 7'N | 57° 6'E  | 56  | PECHORA                | Russia | 1953/2016 | 1953-2016 | 43472 |
| RSM00023472 | 65°48'N | 87°59'E  | 38  | TURUHAN'SK             | Russia | 1951/2016 | 1951-2016 | 51089 |
| RSM00023552 | 64°55'N | 77°49'E  | 27  | TARKO-SALE             | Russia | 1955/1998 | 1955-1998 | 26373 |

|             |         |          |     |                  |        |           |           |       |
|-------------|---------|----------|-----|------------------|--------|-----------|-----------|-------|
| RSM00023802 | 61°41'N | 50°47'E  | 116 | SYKTYVKAR        | Russia | 1947/2016 | 1947-2016 | 45753 |
| RSM00023884 | 61°35'N | 90° 2'E  | 62  | BOR              | Russia | 1950/2016 | 1950-2016 | 45209 |
| RSM00023921 | 60°41'N | 60°27'E  | 93  | IVDEL            | Russia | 1953/2016 | 1953-1998 | 28744 |
|             |         |          |     |                  |        |           | 2000-2016 | 9976  |
| RSM00023933 | 61° 2'N | 69° 7'E  | 44  | HANTY-MANSIJSK   | Russia | 1946/2016 | 1947-2004 | 38847 |
|             |         |          |     |                  |        |           | 2008-2016 | 5829  |
| RSM00023955 | 60°26'N | 77°52'E  | 47  | ALEKSANDROVSKOE  | Russia | 1949/2016 | 1949-2016 | 48234 |
| RSM00024125 | 68°30'N | 112°26'E | 207 | OLENEK           | Russia | 1954/2016 | 1954-2016 | 36952 |
| RSM00024266 | 67°34'N | 133°24'E | 136 | VERHOJANSK       | Russia | 1952/2016 | 1952-2016 | 44232 |
| RSM00024343 | 66°46'N | 123°24'E | 88  | ZHIGANSK         | Russia | 1951/2016 | 1951-2016 | 43118 |
| RSM00024507 | 64°16'N | 100°13'E | 188 | TURA             | Russia | 1955/2016 | 1955-2016 | 38343 |
| RSM00024641 | 63°47'N | 121°37'E | 111 | VILJUJSK         | Russia | 1951/2016 | 1951-2016 | 39575 |
| RSM00024688 | 63°15'N | 143° 9'E | 740 | OJMJAKON         | Russia | 1950/2016 | 1950-2016 | 41046 |
| RSM00024726 | 62°32'N | 113°52'E | 351 | MIRNVY           | Russia | 1966/2016 | 1966-1994 | 18809 |
|             |         |          |     |                  |        |           | 1998-2016 | 9874  |
| RSM00024790 | 62°47'N | 148° 8'E | 649 | SUSUMAN          | Russia | 1959/1991 | 1959-1976 | 9972  |
|             |         |          |     |                  |        |           | 1988-1991 | 1975  |
| RSM00024793 | 62°51'N | 149°46'E | 632 | SHTURMOVOY       | Russia | 1955/1959 | 1955-1959 | 1846  |
| RSM00024817 | 61°16'N | 108°12'E | 278 | ERBOGACEN        | Russia | 1954/1996 | 1954-1996 | 29272 |
| RSM00024908 | 60°20'N | 102°18'E | 259 | VANAVARA         | Russia | 1955/2016 | 1955-1995 | 25142 |
|             |         |          |     |                  |        |           | 1997-2016 | 9892  |
| RSM00024944 | 60°22'N | 120°25'E | 134 | OLEKMINSK        | Russia | 1950/2016 | 1950-2016 | 42830 |
| RSM00024959 | 62° 1'N | 129°43'E | 98  | JAKUTSK          | Russia | 1940/2016 | 1946-2016 | 51793 |
| RSM00025042 | 69°56'N | 167°58'E | 16  | AJON ISLAND      | Russia | 1960/2010 | 1960-1963 | 1853  |
|             |         |          |     |                  |        |           | 1966-1978 | 4513  |
|             |         |          |     |                  |        |           | 1980-1982 | 91    |
|             |         |          |     |                  |        |           | 1998-2006 | 1549  |
|             |         |          |     |                  |        |           | 2009-2010 | 72    |
| RSM00025123 | 68°45'N | 161°17'E | 32  | CHERSKIJ         | Russia | 1955/2016 | 1955-1962 | 3364  |
|             |         |          |     |                  |        |           | 1968-1999 | 24508 |
|             |         |          |     |                  |        |           | 2002-2016 | 8847  |
| RSM00025173 | 68°55'N | 179°29'W | 2   | MYS SHMIDTA      | Russia | 1939/1998 | 1939-1950 | 1578  |
|             |         |          |     |                  |        |           | 1954-1998 | 30936 |
| RSM00025399 | 66°10'N | 169°50'W | 7   | MYS UELEN        | Russia | 1944/1998 | 1944-1944 | 27    |
|             |         |          |     |                  |        |           | 1953-1998 | 29872 |
| RSM00025400 | 65°44'N | 150°54'E | 47  | ZYRYANKA         | Russia | 1954/2016 | 1963-2016 | 32315 |
| RSM00025428 | 65°14'N | 160°32'E | 260 | OMOLON           | Russia | 1957/2016 | 1957-1978 | 11849 |
|             |         |          |     |                  |        |           | 1982-1991 | 7509  |
|             |         |          |     |                  |        |           | 1998-2005 | 1612  |
|             |         |          |     |                  |        |           | 2007-2016 | 4932  |
| RSM00025551 | 64°41'N | 170°25'E | 23  | MARKOVO          | Russia | 1954/1993 | 1954-1993 | 28650 |
| RSM00025563 | 64°47'N | 177°34'E | 64  | ANADYR           | Russia | 1940/2013 | 1940-1944 | 551   |
|             |         |          |     |                  |        |           | 1954-1998 | 31977 |
|             |         |          |     |                  |        |           | 2000-2000 | 146   |
|             |         |          |     |                  |        |           | 2002-2002 | 66    |
|             |         |          |     |                  |        |           | 2013-2013 | 117   |
| RSM00025594 | 64°23'N | 173°14'W | 39  | BUHTA PROVIDENJA | Russia | 1946/1991 | 1946-1946 | 269   |
|             |         |          |     |                  |        |           | 1948-1950 | 182   |
|             |         |          |     |                  |        |           | 1955-1991 | 26915 |
| RSM00025677 | 63° 1'N | 179°17'E | 82  | BERINGOVSKAJA    | Russia | 1949/1995 | 1949-1949 | 45    |

|             |         |          |     |                                |        |           |           |       |
|-------------|---------|----------|-----|--------------------------------|--------|-----------|-----------|-------|
|             |         |          |     |                                |        |           | 1955-1978 | 14933 |
|             |         |          |     |                                |        |           | 1982-1995 | 9121  |
| RSM00025703 | 62°55'N | 152°25'E | 206 | SEJMCHAN                       | Russia | 1955/2016 | 1955-2016 | 44880 |
| RSM00025822 | 61°57'N | 160°52'E | 2   | GIZIGA                         | Russia | 1955/1998 | 1955-1972 | 10115 |
|             |         |          |     |                                |        |           | 1998-1998 | 170   |
| RSM00025913 | 59°33'N | 150°47'E | 115 | MAGADAN                        | Russia | 1950/2016 | 1950-2016 | 53238 |
| RSM00025954 | 60°21'N | 166° 0'E | 4   | KORF                           | Russia | 1951/2006 | 1951-1996 | 33611 |
|             |         |          |     |                                |        |           | 1998-2006 | 2850  |
| RSM00026063 | 59°57'N | 30°42'E  | 72  | ST.PETERSBURG (VOEJKOVO)       | Russia | 1946/2016 | 1946-2016 | 56248 |
| RSM00026065 | 59°56'N | 30°19'E  | 20  | LENINGRAD/CHOSSEYNOR           | Russia | 1954/1956 | 1954-1956 | 253   |
| RSM00026258 | 57°49'N | 28°20'E  | 45  | PSKOV                          | Russia | 1948/1998 | 1948-1991 | 26418 |
|             |         |          |     |                                |        |           | 1993-1998 | 1963  |
| RSM00026298 | 57°53'N | 34° 2'E  | 186 | BOLOGOE                        | Russia | 1952/2016 | 1952-1989 | 25270 |
|             |         |          |     |                                |        |           | 1991-1998 | 3176  |
|             |         |          |     |                                |        |           | 2000-2016 | 10646 |
| RSM00026477 | 56°21'N | 30°37'E  | 97  | VELIKIE LUKI                   | Russia | 1960/2016 | 1960-1996 | 24834 |
|             |         |          |     |                                |        |           | 1998-2003 | 1268  |
|             |         |          |     |                                |        |           | 2005-2016 | 8102  |
| RSM00026702 | 54°44'N | 20°33'E  | 19  | KALININGRAD                    | Russia | 1939/2016 | 1950-2000 | 36074 |
|             |         |          |     |                                |        |           | 2011-2016 | 3890  |
| RSM00026781 | 54°45'N | 32° 4'E  | 240 | SMOLENSK                       | Russia | 1939/2016 | 1947-2016 | 42492 |
| RSM00027038 | 59°19'N | 39°56'E  | 125 | VOLOGDA                        | Russia | 1947/2016 | 1947-2016 | 49410 |
| RSM00027199 | 58°34'N | 49°34'E  | 157 | KIROV                          | Russia | 1947/2016 | 1947-1972 | 14975 |
|             |         |          |     |                                |        |           | 1994-2016 | 14095 |
| RSM00027331 | 57°35'N | 39°35'E  | 103 | JAROSLAVL                      | Russia | 1950/1953 | 1950-1953 | 517   |
| RSM00027459 | 56°16'N | 44° 0'E  | 161 | NIZHNIJ NOVGOROD               | Russia | 1946/2016 | 1946-1972 | 15003 |
|             |         |          |     |                                |        |           | 1994-2016 | 13598 |
| RSM00027595 | 55°36'N | 49°18'E  | 116 | KAZAN                          | Russia | 1947/2016 | 1947-2016 | 51545 |
| RSM00027612 | 55°56'N | 37°31'E  | 187 | MOSKVA (DOLGOPRUDNYJ)          | Russia | 1934/2016 | 1934-1935 | 168   |
|             |         |          |     |                                |        |           | 1938-2016 | 61662 |
| RSM00027707 | 54° 6'N | 35°21'E  | 237 | SUHINICHI                      | Russia | 1961/2016 | 1961-2000 | 22199 |
|             |         |          |     |                                |        |           | 2002-2016 | 8746  |
| RSM00027730 | 54°38'N | 39°42'E  | 155 | RYAZAN                         | Russia | 1962/2016 | 1962-1972 | 5898  |
|             |         |          |     |                                |        |           | 1994-2016 | 13461 |
| RSM00027944 | 52°44'N | 41°28'E  | 161 | TAMBOV                         | Russia | 1948/1995 | 1948-1995 | 30469 |
| RSM00027962 | 53° 7'N | 45° 1'E  | 170 | PENZA                          | Russia | 1961/2016 | 1961-1981 | 9663  |
|             |         |          |     |                                |        |           | 1989-2016 | 16129 |
| RSM00027995 | 52°59'N | 49°26'E  | 45  | SAMARA (BEZENCHUK)             | Russia | 1951/2016 | 1951-1953 | 401   |
|             |         |          |     |                                |        |           | 1994-2000 | 2692  |
|             |         |          |     |                                |        |           | 2005-2016 | 8514  |
| RSM00028225 | 57°57'N | 56°12'E  | 170 | PERM                           | Russia | 1961/2016 | 1961-1972 | 6418  |
|             |         |          |     |                                |        |           | 1998-2016 | 8814  |
| RSM00028275 | 58° 9'N | 68°15'E  | 55  | TOBOL'SK                       | Russia | 1951/2016 | 1951-2016 | 43061 |
| RSM00028445 | 56°44'N | 61° 4'E  | 286 | EKATERINBURG (VERHNEE DUBROVO) | Russia | 1946/2016 | 1946-2016 | 58469 |
| RSM00028661 | 55°27'N | 65°24'E  | 71  | KURGAN                         | Russia | 1955/2016 | 1963-1998 | 19527 |
|             |         |          |     |                                |        |           | 2000-2016 | 9190  |
| RSM00028698 | 54°56'N | 73°24'E  | 90  | OMSK                           | Russia | 1946/2016 | 1946-2016 | 56228 |
| RSM00028722 | 54°43'N | 55°49'E  | 104 | UFA-DIOMA                      | Russia | 1946/2016 | 1946-2016 | 42577 |
| RSM00028900 | 53°15'N | 50°27'E  | 40  | SAMARA                         | Russia | 1939/1994 | 1946-1994 | 37598 |
| RSM00029231 | 58°19'N | 82°57'E  | 73  | KOLPASEVO                      | Russia | 1951/2016 | 1951-2016 | 47582 |

|             |         |          |     |                     |        |           |           |       |
|-------------|---------|----------|-----|---------------------|--------|-----------|-----------|-------|
| RSM00029263 | 58°27'N | 92°12'E  | 77  | ENISEJSK            | Russia | 1964/2016 | 1964-2016 | 37659 |
| RSM00029282 | 58°23'N | 97°27'E  | 131 | BOGUCANY            | Russia | 1951/2016 | 1951-2016 | 40797 |
| RSM00029572 | 56°11'N | 92°36'E  | 205 | EMEL' YANOVO        | Russia | 1995/2016 | 1995-2016 | 14066 |
| RSM00029574 | 56° 0'N | 92°53'E  | 194 | KRASNOYARSK         | Russia | 1953/1972 | 1953-1972 | 14887 |
| RSM00029612 | 55°21'N | 78°18'E  | 119 | BARABINSK           | Russia | 1958/2016 | 1958-2016 | 39069 |
| RSM00029634 | 54°58'N | 82°57'E  | 143 | NOVOSIBIRSK         | Russia | 1946/2016 | 1946-2016 | 56561 |
| RSM00029698 | 54°53'N | 99° 2'E  | 411 | NIZHNEUDINSK        | Russia | 1950/2016 | 1950-2016 | 42239 |
| RSM00029839 | 53°30'N | 83°50'E  | 140 | BARNAUL             | Russia | 1963/2016 | 1963-1965 | 709   |
|             |         |          |     |                     |        |           | 1967-1994 | 22481 |
|             |         |          |     |                     |        |           | 1998-2016 | 10350 |
| RSM00029862 | 53°46'N | 91°19'E  | 254 | ABAKAN              | Russia | 1960/2016 | 1960-1972 | 7439  |
|             |         |          |     |                     |        |           | 1995-2016 | 11889 |
| RSM00030054 | 59°27'N | 112°35'E | 186 | VITIM               | Russia | 1951/2016 | 1951-2016 | 43496 |
| RSM00030230 | 57°46'N | 108° 4'E | 257 | KIRENSK             | Russia | 1950/2016 | 1950-2016 | 50063 |
| RSM00030309 | 56°17'N | 101°45'E | 411 | BRATSK              | Russia | 1967/2016 | 1967-2016 | 34949 |
| RSM00030372 | 56°54'N | 118°16'E | 709 | CHARA               | Russia | 1967/2016 | 1967-2016 | 36413 |
| RSM00030521 | 54°48'N | 105°10'E | 418 | ZHIGALOVO           | Russia | 1950/1996 | 1950-1996 | 26868 |
| RSM00030554 | 54°28'N | 113°35'E | 995 | BAGDARIN            | Russia | 1951/2016 | 1951-2016 | 41398 |
| RSM00030635 | 53°25'N | 109° 1'E | 459 | UST'-BARGUZIN       | Russia | 1960/2016 | 1960-1967 | 3265  |
|             |         |          |     |                     |        |           | 1970-2005 | 21250 |
|             |         |          |     |                     |        |           | 2010-2016 | 3871  |
| RSM00030636 | 53°37'N | 109°38'E | 489 | BARGUZIN            | Russia | 1951/1970 | 1951-1959 | 712   |
|             |         |          |     |                     |        |           | 1967-1970 | 2083  |
| RSM00030673 | 53°45'N | 119°44'E | 624 | MOGOCHA             | Russia | 1953/2016 | 1953-2001 | 29905 |
|             |         |          |     |                     |        |           | 2009-2016 | 4936  |
| RSM00030692 | 54° 0'N | 123°58'E | 400 | SKOVORODINO         | Russia | 1949/1996 | 1950-1996 | 25136 |
| RSM00030710 | 52°16'N | 104°19'E | 469 | IRKUTSK             | Russia | 1940/1988 | 1946-1988 | 36881 |
| RSM00030715 | 52°29'N | 103°51'E | 436 | ANGARSK             | Russia | 1988/2016 | 1988-2016 | 17022 |
| RSM00030758 | 52° 5'N | 113°29'E | 671 | CHITA               | Russia | 1940/2016 | 1946-2016 | 55391 |
| RSM00030935 | 50°22'N | 108°45'E | 770 | KRASNYJ CHIKOJ      | Russia | 1951/2016 | 1951-1952 | 27    |
|             |         |          |     |                     |        |           | 1954-2016 | 44504 |
| RSM00030965 | 50°24'N | 116°31'E | 675 | BORZYA              | Russia | 1957/2016 | 1957-1998 | 29886 |
|             |         |          |     |                     |        |           | 2001-2016 | 9278  |
| RSM00031004 | 58°37'N | 125°22'E | 678 | ALDAN               | Russia | 1950/2016 | 1950-2016 | 46332 |
| RSM00031088 | 59°22'N | 143°12'E | 5   | OHOTSK              | Russia | 1951/2016 | 1951-1996 | 29496 |
|             |         |          |     |                     |        |           | 1998-1998 | 172   |
|             |         |          |     |                     |        |           | 2000-2016 | 9894  |
| RSM00031168 | 56°27'N | 138° 9'E | 6   | AYAN                | Russia | 1950/2016 | 1950-2016 | 31884 |
| RSM00031300 | 53°44'N | 127°17'E | 228 | ZEJA                | Russia | 1955/2016 | 1955-1998 | 31775 |
|             |         |          |     |                     |        |           | 2000-2016 | 9483  |
| RSM00031329 | 53° 4'N | 132°59'E | 542 | EKIMCHAN            | Russia | 1951/1996 | 1951-1996 | 25360 |
| RSM00031369 | 53° 9'N | 140°42'E | 45  | NIKOLAEVSK-NA-AMURE | Russia | 1951/2016 | 1951-1952 | 101   |
|             |         |          |     |                     |        |           | 1955-1998 | 30476 |
|             |         |          |     |                     |        |           | 2000-2016 | 9351  |
| RSM00031510 | 50°17'N | 127°29'E | 168 | BLAGOVESCETNSK      | Russia | 1940/2016 | 1947-1948 | 283   |
|             |         |          |     |                     |        |           | 1950-1991 | 31294 |
|             |         |          |     |                     |        |           | 1995-1999 | 1770  |
|             |         |          |     |                     |        |           | 2001-2016 | 8879  |
| RSM00031538 | 50° 4'N | 132° 8'E | 343 | SUTUR               | Russia | 1958/2016 | 1958-1991 | 21989 |
|             |         |          |     |                     |        |           | 1998-1999 | 396   |

|             |         |          |      |                           |        |           |           |       |
|-------------|---------|----------|------|---------------------------|--------|-----------|-----------|-------|
|             |         |          |      |                           |        |           | 2001-2016 | 8245  |
| RSM00031561 | 50°36'N | 137° 2'E | 19   | KOMSOMOLSK-ON-AMUR        | Russia | 1940/2010 | 1955-1991 | 25907 |
|             |         |          |      |                           |        |           | 1998-2003 | 970   |
|             |         |          |      |                           |        |           | 2009-2010 | 339   |
| RSM00031707 | 47°44'N | 130°58'E | 73   | EKATERINO-NIKOLSKOE       | Russia | 1948/1993 | 1948-1948 | 32    |
|             |         |          |      |                           |        |           | 1950-1993 | 24630 |
| RSM00031736 | 48°32'N | 135°14'E | 72   | HABAROVSK                 | Russia | 1940/2016 | 1947-2016 | 51514 |
| RSM00031770 | 49° 0'N | 140°18'E | 21   | SOVETSKAYA GAVAN          | Russia | 1964/2016 | 1964-1991 | 19470 |
|             |         |          |      |                           |        |           | 1998-1998 | 217   |
|             |         |          |      |                           |        |           | 2008-2016 | 5295  |
| RSM00031873 | 45°52'N | 133°44'E | 100  | DAL'NERECHENSK            | Russia | 1957/2016 | 1957-1998 | 30105 |
|             |         |          |      |                           |        |           | 2000-2016 | 9939  |
| RSM00031909 | 45° 0'N | 136°36'E | 68   | TERNEJ                    | Russia | 1950/1996 | 1950-1996 | 29372 |
| RSM00031977 | 43°16'N | 132° 3'E | 77   | VLADIVOSTOK (SAD GOROD)   | Russia | 1940/2016 | 1946-1948 | 38    |
|             |         |          |      |                           |        |           | 1950-2016 | 54458 |
| RSM00032061 | 50°54'N | 142°10'E | 30   | ALEKSANDROVSK-SAHALINSKIJ | Russia | 1951/2016 | 1951-2016 | 47081 |
| RSM00032098 | 49°13'N | 143° 6'E | 7    | PORONAJSK                 | Russia | 1970/2016 | 1970-1991 | 18268 |
|             |         |          |      |                           |        |           | 1997-2016 | 10183 |
| RSM00032099 | 48°39'N | 144°45'E | 33   | M. TERPENIYA (FL)         | Russia | 1955/1970 | 1955-1970 | 7503  |
| RSM00032150 | 46°57'N | 142°43'E | 22   | JUZHNO-SAHALINSK          | Russia | 1948/2016 | 1948-1948 | 90    |
|             |         |          |      |                           |        |           | 1950-2016 | 56840 |
| RSM00032165 | 44° 1'N | 145°52'E | 49   | JUZHNO-KURILSK            | Russia | 1951/1995 | 1951-1995 | 32314 |
| RSM00032186 | 46°12'N | 150°31'E | 73   | URUP                      | Russia | 1961/1972 | 1961-1972 | 7603  |
| RSM00032195 | 46°51'N | 151°52'E | 26   | SIMUSIR                   | Russia | 1953/1961 | 1953-1961 | 4132  |
| RSM00032215 | 50°41'N | 156° 8'E | 24   | SEVERO-KURIL'SK           | Russia | 1994/2016 | 1994-2003 | 2883  |
|             |         |          |      |                           |        |           | 2008-2016 | 5767  |
| RSM00032217 | 50° 1'N | 155°24'E | 11   | M. VASILYEV               | Russia | 1953/1972 | 1953-1972 | 11050 |
| RSM00032389 | 56°19'N | 160°50'E | 28   | KLJUCHI                   | Russia | 1950/2016 | 1950-2016 | 42351 |
| RSM00032477 | 54°18'N | 155°55'E | 25   | SOBOLEVO                  | Russia | 1967/2016 | 1967-1978 | 5774  |
|             |         |          |      |                           |        |           | 1998-2016 | 7034  |
| RSM00032540 | 53° 5'N | 158°35'E | 78   | PETROPAVLOVSK-KAMCHATSKIJ | Russia | 1948/2016 | 1948-2016 | 56995 |
| RSM00032618 | 55°12'N | 165°59'E | 16   | OSTROV BERINGA            | Russia | 1957/2016 | 1957-1996 | 33272 |
|             |         |          |      |                           |        |           | 2013-2016 | 2738  |
| RSM00034009 | 51°46'N | 36°10'E  | 246  | KURSK                     | Russia | 1946/2016 | 1946-2016 | 52613 |
| RSM00034122 | 51°39'N | 39°15'E  | 100  | VORONEZ                   | Russia | 1939/2016 | 1960-2016 | 37308 |
| RSM00034139 | 51°11'N | 40°42'E  | 193  | KAMENNAYA STEP NO2        | Russia | 1952/1961 | 1952-1961 | 6138  |
| RSM00034172 | 51°33'N | 46° 2'E  | 167  | SARATOV                   | Russia | 1947/2016 | 1947-1998 | 32916 |
|             |         |          |      |                           |        |           | 2008-2016 | 5814  |
| RSM00034247 | 50°25'N | 41° 3'E  | 90   | KALACH                    | Russia | 1961/2016 | 1961-2016 | 33281 |
| RSM00034467 | 48°47'N | 44°20'E  | 141  | VOLGOGRAD                 | Russia | 1947/2016 | 1947-2016 | 49483 |
| RSM00034731 | 47°15'N | 39°49'E  | 78   | ROSTOV-NA-DONU            | Russia | 1939/2016 | 1946-2016 | 54107 |
| RSM00034858 | 45°55'N | 43°21'E  | 86   | DIVNOE                    | Russia | 1957/2016 | 1958-1982 | 14714 |
|             |         |          |      |                           |        |           | 1984-2016 | 19715 |
| RSM00034866 | 46°11'N | 45°21'E  | 7    | YASHKUL                   | Russia | 1951/1957 | 1951-1957 | 1182  |
| RSM00034882 | 46°17'N | 47°59'E  | -17  | ASTRAHAN                  | Russia | 1939/2016 | 1947-1998 | 35228 |
|             |         |          |      |                           |        |           | 2000-2016 | 10031 |
| RSM00035121 | 51°42'N | 55° 5'E  | 115  | ORENBURG                  | Russia | 1939/2016 | 1947-2016 | 46321 |
| RSM00036096 | 51°43'N | 94°30'E  | 626  | KYZYL                     | Russia | 1955/2016 | 1964-2016 | 34962 |
| RSM00036259 | 50° 0'N | 88°40'E  | 1758 | KOS-AGAC                  | Russia | 1969/1991 | 1969-1971 | 158   |
|             |         |          |      |                           |        |           | 1973-1991 | 10277 |

|             |         |          |      |                           |              |           |           |       |
|-------------|---------|----------|------|---------------------------|--------------|-----------|-----------|-------|
| RSM00037011 | 44° 6'N | 39° 2'E  | 95   | TUAPSE                    | Russia       | 1950/2016 | 1950-1951 | 483   |
|             |         |          |      |                           |              |           | 1953-1997 | 28486 |
|             |         |          |      |                           |              |           | 2005-2016 | 7455  |
| RSM00037050 | 44° 3'N | 43° 2'E  | 573  | PJATIGORSK                | Russia       | 1947/1951 | 1947-1947 | 99    |
|             |         |          |      |                           |              |           | 1951-1951 | 93    |
| RSM00037055 | 44°13'N | 43° 6'E  | 313  | MINERAL'NYE VODY          | Russia       | 1947/2016 | 1947-2016 | 53110 |
| RSM00037099 | 43°35'N | 39°46'E  | 142  | SOCHI                     | Russia       | 2013/2014 | 2013-2014 | 194   |
| RSM00037259 | 43° 0'N | 47°30'E  | -20  | MAHACHKALA                | Russia       | 1963/2016 | 1963-1990 | 8512  |
|             |         |          |      |                           |              |           | 1998-2016 | 9996  |
| RSXUAC00073 | 59°41'N | 30°27'E  | 35   | SLUTSK                    | Russia       | 1939/1939 | -         | 0     |
| RSXUAC00075 | 56°48'N | 60°36'E  | 252  | SWERDLOWSK                | Russia       | 1940/1941 | -         | 0     |
| RSXUAE04636 | 53° 3'N | 158°20'E | 5    | NIKOLAEVKA                | Russia       | 1954/1955 | 1954-1955 | 127   |
| SAM00040373 | 28°19'N | 46° 8'E  | 358  | AL-QAISUMAH               | Saudi Arabia | 1977/2016 | 1980-1985 | 3665  |
|             |         |          |      |                           |              |           | 1990-1999 | 5540  |
|             |         |          |      |                           |              |           | 2002-2016 | 6973  |
| SAM00040375 | 28°23'N | 36°36'E  | 778  | TABUK                     | Saudi Arabia | 1976/2016 | 1976-2016 | 26712 |
| SAM00040394 | 27°26'N | 41°41'E  | 1015 | HAIL                      | Saudi Arabia | 1986/2016 | 1986-2016 | 17847 |
| SAM00040400 | 26°12'N | 36°29'E  | 24   | AL-WEJH                   | Saudi Arabia | 1973/1985 | 1973-1974 | 209   |
|             |         |          |      |                           |              |           | 1977-1985 | 5184  |
| SAM00040416 | 26°16'N | 50°10'E  | 19   | DHAHRAN                   | Saudi Arabia | 1976/1997 | 1976-1997 | 15065 |
| SAM00040417 | 26°27'N | 49°49'E  | 22   | K.F.I.A.                  | Saudi Arabia | 1998/2016 | 1998-2016 | 11075 |
| SAM00040430 | 24°33'N | 39°42'E  | 654  | AL-MADINAH                | Saudi Arabia | 1975/2016 | 1980-1999 | 11472 |
|             |         |          |      |                           |              |           | 2002-2016 | 10059 |
| SAM00040437 | 24°56'N | 46°43'E  | 614  | KING KHALED INT. AIRPORT  | Saudi Arabia | 1984/2016 | 1984-2016 | 20588 |
| SAM00040438 | 24°42'N | 46°44'E  | 603  | RIYADH OBS.               | Saudi Arabia | 1968/1992 | 1968-1983 | 9670  |
|             |         |          |      |                           |              |           | 1985-1985 | 54    |
|             |         |          |      |                           |              |           | 1989-1992 | 126   |
| SAM00041024 | 21°42'N | 39°11'E  | 15   | JEDDAH                    | Saudi Arabia | 1966/2016 | 1966-1972 | 2648  |
|             |         |          |      |                           |              |           | 1983-2016 | 22757 |
| SAM00041112 | 18°14'N | 42°39'E  | 2090 | ABHA                      | Saudi Arabia | 1999/2016 | 1999-2016 | 10423 |
| SAM00041114 | 18°18'N | 42°48'E  | 2066 | KHAMIS MUSHAIT            | Saudi Arabia | 1983/1999 | 1983-1999 | 11109 |
| SAM00041140 | 16°53'N | 42°35'E  | 7    | GIZAN                     | Saudi Arabia | 1983/1985 | 1983-1985 | 1629  |
| SEM00063985 | 4°41'S  | 55°31'E  | 4    | SEYCHELLES INTER. AIRPORT | Seychelles   | 1973/2016 | 1976-2016 | 14553 |
| SFM00068174 | 23°52'S | 29°27'E  | 1230 | PIETERSBURG (SAAF)        | South Africa | 1973/2009 | 1986-2009 | 9248  |
| SFM00068242 | 25°47'S | 25°32'E  | 1277 | MAFIKENG WO               | South Africa | 1996/1998 | 1996-1998 | 1146  |
| SFM00068262 | 25°44'S | 28°11'E  | 1326 | PRETORIA-EENDRACHT        | South Africa | 1957/1974 | 1957-1959 | 1269  |
|             |         |          |      |                           |              |           | 1966-1974 | 2599  |
| SFM00068263 | 25°55'S | 28°13'E  | 1526 | PRETORIA (IRENE)          | South Africa | 1974/2016 | 1974-2016 | 26598 |
| SFM00068406 | 28°34'S | 16°32'E  | 21   | KORTDOORN/ALEXANDER       | South Africa | 1951/1972 | 1951-1953 | 526   |
|             |         |          |      |                           |              |           | 1957-1959 | 690   |
|             |         |          |      |                           |              |           | 1966-1972 | 1176  |
| SFM00068424 | 28°25'S | 21°16'E  | 835  | UPINGTON                  | South Africa | 1973/2016 | 1976-1998 | 14561 |
|             |         |          |      |                           |              |           | 2001-2002 | 169   |
|             |         |          |      |                           |              |           | 2004-2004 | 2     |
|             |         |          |      |                           |              |           | 2007-2016 | 3029  |
| SFM00068442 | 29° 6'S | 26°18'E  | 1353 | BLOEMFONTEIN AIRPORT      | South Africa | 1966/2016 | 1966-1999 | 17940 |
|             |         |          |      |                           |              |           | 2002-2016 | 4640  |
| SFM00068461 | 28°15'S | 28°20'E  | 1680 | BETHLEHEM AIRPORT         | South Africa | 1980/2009 | 1980-2009 | 10094 |
| SFM00068512 | 29°40'S | 17°53'E  | 1006 | SPRINGBOK                 | South Africa | 1987/2016 | 1987-2009 | 9398  |
|             |         |          |      |                           |              |           | 2013-2016 | 916   |



|             |         |          |      |                          |              |           |           |       |
|-------------|---------|----------|------|--------------------------|--------------|-----------|-----------|-------|
| SFM00068538 | 30°40'S | 23°60'E  | 1286 | DE AAR                   | South Africa | 1993/2016 | 1993-2015 | 8820  |
| SFM00068588 | 29°58'S | 30°57'E  | 8    | DURBAN/LOUIS BOTHA       | South Africa | 1949/2010 | 1949-1954 | 1409  |
|             |         |          |      |                          |              |           | 1957-1959 | 932   |
|             |         |          |      |                          |              |           | 1966-2010 | 25190 |
| SFM00068592 | 29°36'S | 31° 8'E  | 105  | KING SHAKA INT'L AIRPORT | South Africa | 2010/2016 | 2010-2016 | 4047  |
| SFM00068816 | 33°58'S | 18°36'E  | 46   | CAPE TOWN INTNL. AIRPORT | South Africa | 1949/2016 | 1949-1959 | 3769  |
|             |         |          |      |                          |              |           | 1966-2016 | 29522 |
| SFM00068842 | 33°59'S | 25°37'E  | 63   | PORT ELIZABETH           | South Africa | 1967/2016 | 1967-2016 | 26028 |
| SFM00068994 | 46°53'S | 37°52'E  | 24   | MARION ISLAND            | South Africa | 1949/2016 | 1949-1959 | 2971  |
|             |         |          |      |                          |              |           | 1966-2014 | 27232 |
|             |         |          |      |                          |              |           | 2016-2016 | 591   |
| SGM00061641 | 14°44'N | 17°30'W  | 25   | DAKAR/YOFF               | Senegal      | 1940/2016 | 1949-2016 | 37648 |
| SGM00061687 | 13°46'N | 13°41'W  | 49   | TAMBACOUNDA              | Senegal      | 1940/2016 | 1995-2016 | 4789  |
| SHM00061901 | 15°57'S | 5°40'W   | 435  | ST. HELENA IS.           | Saint Helena | 1977/2016 | 1977-2016 | 11274 |
| SHM00061902 | 7°58'S  | 14°24'W  | 79   | WIDE AWAKE FIELD         | Saint Helena | 1946/2010 | 1946-1946 | 52    |
|             |         |          |      |                          |              |           | 1957-2001 | 15979 |
|             |         |          |      |                          |              |           | 2003-2010 | 1741  |
| SHM00068906 | 40°21'S | 9°53'W   | 54   | GOUGH ISLAND             | Saint Helena | 1957/2016 | 1957-1959 | 1302  |
|             |         |          |      |                          |              |           | 1966-2016 | 28524 |
| SIM00014015 | 46° 4'N | 14°31'E  | 299  | LJUBLJANA/BEZIGRAD       | Slovenia     | 1996/2016 | 1996-2016 | 6213  |
| SNM00048698 | 1°22'N  | 103°59'E | 5    | SINGAPORE/CHANGI AIRPORT | Singapore    | 1955/2016 | 1955-1955 | 96    |
|             |         |          |      |                          |              |           | 1957-2016 | 32037 |
| SPM00008001 | 43°22'N | 8°25'W   | 58   | LA CORUNA                | Spain        | 1958/2016 | 1958-2016 | 37016 |
| SPM00008023 | 43°29'N | 3°48'W   | 52   | SANTANDER                | Spain        | 1973/2016 | 1986-2016 | 20015 |
| SPM00008160 | 41°41'N | 1° 4'W   | 252  | ZARAGOZA/BASE AEREA      | Spain        | 1958/2015 | 1958-1965 | 4655  |
|             |         |          |      |                          |              |           | 1982-1982 | 65    |
|             |         |          |      |                          |              |           | 1992-2015 | 13950 |
| SPM00008190 | 41°23'N | 2° 7'E   | 95   | BARCELONA SERVEI         | Spain        | 2007/2016 | 2007-2016 | 6371  |
| SPM00008221 | 40°28'N | 3°35'W   | 631  | MADRID/BARAJAS RS        | Spain        | 1950/2016 | 1950-1950 | 68    |
|             |         |          |      |                          |              |           | 1952-2016 | 40064 |
| SPM00008301 | 39°33'N | 2°37'E   | 6    | PALMA DE MALLORCA        | Spain        | 1988/2002 | 1988-2002 | 9932  |
| SPM00008302 | 39°36'N | 2°42'E   | 41   | MALLORCA-SON BONET       | Spain        | 1958/2016 | 1958-1988 | 14398 |
|             |         |          |      |                          |              |           | 2002-2016 | 9842  |
| SPM00008430 | 38° 0'N | 1°10'W   | 61   | MURCIA                   | Spain        | 1984/2016 | 1984-2016 | 22440 |
| SPM00060018 | 28°19'N | 16°23'W  | 105  | TENERIFE-GUIMAR          | Spain        | 2002/2016 | 2002-2016 | 9938  |
| SPM00060020 | 28°28'N | 16°15'W  | 36   | STA. CRUZ DE TENERI      | Spain        | 1960/2002 | 1960-2002 | 22665 |
| STM00078949 | 13°45'N | 60°59'W  | 99   | VIEUX FORT               | Saint Lucia  | 1956/1957 | 1956-1957 | 814   |
| SUM00062641 | 19°35'N | 37°13'E  | 3    | PORT SUDAN               | Sudan        | 1947/2006 | 1968-1970 | 126   |
|             |         |          |      |                          |              |           | 1972-1982 | 250   |
| SUM00062650 | 19°10'N | 30°29'E  | 226  | DONGOLA                  | Sudan        | 1973/2008 | 1974-1979 | 155   |
|             |         |          |      |                          |              |           | 2008-2008 | 1     |
| SUM00062721 | 15°36'N | 32°33'E  | 382  | KHARTOUM                 | Sudan        | 1953/2014 | 1953-1983 | 5352  |
|             |         |          |      |                          |              |           | 1988-1992 | 582   |
|             |         |          |      |                          |              |           | 1994-1994 | 30    |
|             |         |          |      |                          |              |           | 1997-2005 | 1351  |
|             |         |          |      |                          |              |           | 2011-2014 | 489   |
| SUM00062760 | 13°37'N | 25°20'E  | 733  | EL FASHER                | Sudan        | 1939/2008 | 1973-1980 | 202   |
| SVM00001004 | 78°55'N | 11°55'E  | 16   | NY-ALESUND II            | Svalbard     | 1992/2016 | 1992-2016 | 8959  |
| SVM00001028 | 74°30'N | 19° 0'E  | 20   | BJORNOYA                 | Svalbard     | 1957/2016 | 1957-2016 | 42688 |
| SVM00020107 | 78° 4'N | 14°13'E  | 49   | BARENTSBURG              | Svalbard     | 1937/1994 | 1937-1938 | 57    |

|             |         |          |      |                             |                               |           |           |       |
|-------------|---------|----------|------|-----------------------------|-------------------------------|-----------|-----------|-------|
|             |         |          |      |                             |                               |           | 1940-1940 | 41    |
|             |         |          |      |                             |                               |           | 1950-1950 | 329   |
|             |         |          |      |                             |                               |           | 1953-1961 | 3201  |
|             |         |          |      |                             |                               |           | 1964-1994 | 17873 |
| SWM00002062 | 63°11'N | 14°30'E  | 366  | OSTERSUND/FROSON            | Sweden                        | 1949/1972 | 1949-1965 | 9386  |
|             |         |          |      |                             |                               |           | 1967-1967 | 45    |
|             |         |          |      |                             |                               |           | 1971-1972 | 693   |
| SWM00002077 | 59°21'N | 17°57'E  | 22   | STOCKHOLM/BROMMA            | Sweden                        | 1949/1972 | 1949-1972 | 14937 |
| SWM00002084 | 57°43'N | 11°47'E  | 5    | GOTEBURG/TORSLANDA          | Sweden                        | 1949/1972 | 1949-1972 | 14857 |
| SWM00002185 | 65°33'N | 22° 7'E  | 17   | LULEA-KALLAX                | Sweden                        | 1949/2016 | 1949-1949 | 152   |
|             |         |          |      |                             |                               |           | 1964-2016 | 34735 |
| SWM00002365 | 62°32'N | 17°26'E  | 4    | SUNDSVALL HARNOSAND         | Sweden                        | 1965/2016 | 1965-1972 | 4842  |
|             |         |          |      |                             |                               |           | 1977-2016 | 30859 |
| SWM00002515 | 58°11'N | 12° 9'E  | 20   | TORPABRON                   | Sweden                        | 1977/1977 | 1977-1977 | 185   |
| SWM00002527 | 57°39'N | 12°17'E  | 164  | GOTEBORG/LANDVETTER         | Sweden                        | 1977/2016 | 1977-2016 | 26766 |
| SWM00002591 | 57°39'N | 18°21'E  | 45   | VISBY AEROLOGISKA STATION   | Sweden                        | 1977/2016 | 1977-1995 | 12751 |
|             |         |          |      |                             |                               |           | 1998-2016 | 11922 |
| SXM00088968 | 60°45'S | 44°43'W  | 4    | ISLAS ORCADAS (MET)         | South Georgia and the Islands | 1957/1985 | 1957-1958 | 665   |
|             |         |          |      |                             |                               |           | 1964-1975 | 5685  |
|             |         |          |      |                             |                               |           | 1978-1985 | 2328  |
| SYM00040007 | 36°20'N | 37°13'E  | 425  | ALEPPO INT. AEROPOR         | Syria                         | 1957/1996 | 1957-1989 | 14435 |
|             |         |          |      |                             |                               |           | 1993-1996 | 609   |
| SYM00040080 | 33°25'N | 36°31'E  | 610  | DAMASCUS INT. AIRPO         | Syria                         | 1973/2001 | 1974-1989 | 6776  |
|             |         |          |      |                             |                               |           | 1991-1995 | 792   |
|             |         |          |      |                             |                               |           | 2000-2001 | 209   |
| SZM00006610 | 46°49'N | 6°57'E   | 490  | PAYERNE                     | Switzerland                   | 1943/2016 | 1949-1951 | 777   |
|             |         |          |      |                             |                               |           | 1953-2016 | 40996 |
| TDM00078967 | 10°41'N | 61°37'W  | 13   | TRINIDAD BWI                | Trinidad and Tobago           | 1949/1969 | 1949-1949 | 25    |
|             |         |          |      |                             |                               |           | 1952-1969 | 10285 |
| TDM00078970 | 10°37'N | 61°21'W  | 12   | PIARCO INT. AIRPORT         | Trinidad and Tobago           | 1969/2016 | 1969-2016 | 23149 |
| TEM00061976 | 15°53'S | 54°31'E  | 7    | SERGE-FROLOW (ILE TROMELIN) | Tromelin Island               | 1973/2011 | 1998-2011 | 4491  |
| THM00048327 | 18°46'N | 98°58'E  | 313  | CHIANG MAI                  | Thailand                      | 1954/2016 | 1954-1957 | 442   |
|             |         |          |      |                             |                               |           | 1959-2016 | 24352 |
| THM00048354 | 17°23'N | 102°49'E | 177  | UDON THANI                  | Thailand                      | 1966/2016 | 1966-1975 | 9627  |
| THM00048407 | 15°15'N | 104°52'E | 122  | UBON RATCHATHANI            | Thailand                      | 1962/2016 | 1962-2009 | 25997 |
|             |         |          |      |                             |                               |           | 2011-2016 | 703   |
| THM00048453 | 13°40'N | 100°36'E | 1    | BANGNA AGROMET              | Thailand                      | 2008/2016 | 2008-2016 | 2247  |
| THM00048455 | 13°44'N | 100°34'E | 4    | BANGKOK METROPOLIS          | Thailand                      | 1953/2008 | 1953-2008 | 28201 |
| THM00048565 | 8° 9'N  | 98°19'E  | 6    | PHUKET AIRPORT              | Thailand                      | 1973/2016 | 1990-2009 | 5764  |
|             |         |          |      |                             |                               |           | 2011-2016 | 747   |
| THM00048568 | 7°11'N  | 100°36'E | 5    | SONGKHLA                    | Thailand                      | 1954/2016 | 1954-2016 | 23598 |
| TIM00038836 | 38°33'N | 68°47'E  | 800  | DUSHANBE                    | Tajikistan                    | 1946/1994 | 1946-1994 | 33231 |
| TIM00038954 | 37°30'N | 71°30'E  | 2077 | KHOROG                      | Tajikistan                    | 1956/1994 | 1956-1968 | 7431  |
|             |         |          |      |                             |                               |           | 1973-1994 | 19610 |
| TKM00078118 | 21°27'N | 71° 9'W  | 10   | TURKS ISLAND                | Turks and Caicos Islands      | 1954/1978 | 1954-1978 | 10529 |
| TSM00060715 | 36°50'N | 10°14'E  | 4    | TUNIS-CARTHAGE              | Tunisia                       | 1948/2016 | 1948-1953 | 1565  |
|             |         |          |      |                             |                               |           | 1964-2016 | 23235 |
| TSM00060760 | 33°55'N | 8°10'E   | 86   | TOZEUR                      | Tunisia                       | 1969/2016 | 1969-2016 | 11725 |
| TUM00017030 | 41°17'N | 36°18'E  | 4    | SAMSUN                      | Turkey                        | 1952/2016 | 1952-1954 | 286   |
|             |         |          |      |                             |                               |           | 1956-2016 | 31370 |

[illegible]

|             |         |         |      |                         |                |           |           |       |
|-------------|---------|---------|------|-------------------------|----------------|-----------|-----------|-------|
| UCM00078988 | 12°12'N | 68°58'W | 8    | HATO AIRPORT            | Curacao        | 1956/2016 | 1956-2016 | 33573 |
| UGM00063705 | 0° 3'N  | 32°27'E | 1155 | ENTEBBE AIRPORT         | Uganda         | 1959/2014 | 1959-1976 | 4668  |
|             |         |         |      |                         |                |           | 1993-1994 | 121   |
|             |         |         |      |                         |                |           | 1997-1997 | 143   |
|             |         |         |      |                         |                |           | 1999-1999 | 213   |
|             |         |         |      |                         |                |           | 2001-2002 | 146   |
|             |         |         |      |                         |                |           | 2013-2014 | 115   |
| UKM00003005 | 60° 8'N | 1°11'W  | 82   | LERWICK                 | United Kingdom | 1941/2016 | 1949-2016 | 47034 |
| UKM00003023 | 57°21'N | 7°23'W  | 4    | SOUTH UIST RANGE        | United Kingdom | 1998/2016 | 1998-1999 | 78    |
|             |         |         |      |                         |                |           | 2003-2006 | 218   |
|             |         |         |      |                         |                |           | 2014-2016 | 78    |
| UKM00003026 | 58°13'N | 6°19'W  | 9    | STORNOWAY               | United Kingdom | 1949/2002 | 1949-2002 | 36501 |
| UKM00003066 | 57°39'N | 3°34'W  | 7    | KINLOSS                 | United Kingdom | 1993/2004 | 1993-2000 | 695   |
|             |         |         |      |                         |                |           | 2003-2004 | 69    |
| UKM00003091 | 57°12'N | 2°13'W  | 65   | ABERDEEN/DYCE AIRPO     | United Kingdom | 1989/1999 | 1989-1995 | 386   |
|             |         |         |      |                         |                |           | 1999-1999 | 35    |
| UKM00003162 | 55°19'N | 3°12'W  | 242  | ESKDALEMUIR             | United Kingdom | 1999/2000 | 1999-2000 | 233   |
| UKM00003170 | 56°26'N | 2°52'W  | 5    | SHANWELL                | United Kingdom | 1959/1972 | 1959-1972 | 7514  |
| UKM00003171 | 56°23'N | 2°52'W  | 12   | LEUCHARS                | United Kingdom | 1949/2002 | 1949-1959 | 3046  |
|             |         |         |      |                         |                |           | 1999-1999 | 58    |
|             |         |         |      |                         |                |           | 2002-2002 | 34    |
| UKM00003238 | 55° 1'N | 1°53'W  | 142  | ALBEMARLE               | United Kingdom | 2002/2016 | 2002-2016 | 8912  |
| UKM00003240 | 55°25'N | 1°36'W  | 23   | BOULMER                 | United Kingdom | 1992/2002 | 1992-2002 | 12410 |
| UKM00003257 | 54°18'N | 1°32'W  | 40   | LEEMING                 | United Kingdom | 1990/2000 | 1990-2000 | 775   |
| UKM00003322 | 53°33'N | 2°55'W  | 56   | AUGHTON                 | United Kingdom | 1949/1972 | 1949-1972 | 10433 |
| UKM00003354 | 53° 0'N | 1°15'W  | 117  | NOTTINGHAM              | United Kingdom | 1998/2016 | 1998-2016 | 14009 |
| UKM00003377 | 53°10'N | 0°31'W  | 70   | WADDINGTON              | United Kingdom | 1989/2005 | 1989-2000 | 897   |
|             |         |         |      |                         |                |           | 2005-2005 | 81    |
| UKM00003414 | 52°48'N | 2°40'W  | 76   | SHAWBURY                | United Kingdom | 1997/2000 | 1997-2000 | 561   |
| UKM00003496 | 52°41'N | 1°41'E  | 13   | HEMSBY                  | United Kingdom | 1951/2001 | 1951-1972 | 10001 |
|             |         |         |      |                         |                |           | 1998-2001 | 4419  |
| UKM00003502 | 52° 8'N | 4°34'W  | 133  | ABERPORTH               | United Kingdom | 1969/2016 | 1969-2016 | 18453 |
| UKM00003590 | 52° 7'N | 0°58'E  | 87   | WATTISHAM               | United Kingdom | 1999/2006 | 1999-2006 | 437   |
| UKM00003649 | 51°45'N | 1°35'W  | 88   | BRIZE NORTON            | United Kingdom | 1992/2005 | 1992-2005 | 1003  |
| UKM00003693 | 51°33'N | 0°50'E  | 2    | SHOEBURYNNESS           | United Kingdom | 1966/2010 | 1966-2000 | 8872  |
|             |         |         |      |                         |                |           | 2004-2010 | 1146  |
| UKM00003715 | 51°24'N | 3°21'W  | 67   | CARDIFF-WALES ARPT      | United Kingdom | 1989/1997 | 1989-1997 | 884   |
| UKM00003743 | 51°12'N | 1°48'W  | 132  | LARKHILL                | United Kingdom | 1942/2016 | 1949-1953 | 1470  |
|             |         |         |      |                         |                |           | 1968-2016 | 23262 |
| UKM00003774 | 51° 5'N | 0°13'W  | 144  | CRAWLEY                 | United Kingdom | 1953/1972 | 1953-1972 | 9326  |
| UKM00003808 | 50°13'N | 5°20'W  | 87   | CAMBORNE                | United Kingdom | 1949/2016 | 1949-2016 | 47713 |
| UKM00003882 | 50°54'N | 0°19'E  | 52   | HERSTMONCEUX            | United Kingdom | 1993/2016 | 1993-2016 | 20140 |
| UKM00003917 | 54°39'N | 6°13'W  | 66   | BELFAST/ALDERGROVE ARPT | United Kingdom | 1949/1962 | 1949-1962 | 4189  |
| UKM00003918 | 54°30'N | 6°20'W  | 18   | CASTOR BAY              | United Kingdom | 2002/2016 | 2002-2016 | 9273  |
| UKM00003920 | 54°29'N | 6° 6'W  | 37   | LONG KESH               | United Kingdom | 1962/2002 | 1962-1972 | 6587  |
|             |         |         |      |                         |                |           | 1998-2002 | 6283  |
| UKM00033966 | 45° 3'N | 34°36'E | 205  | KRYMSKA                 | United Kingdom | 2011/2013 | 2011-2013 | 492   |
| UKXUAC03371 | 44°37'N | 33°32'E | 8    | SEWASTOPOL              | United Kingdom | 1939/1949 | -         | 0     |
| UPM00033317 | 50°10'N | 27° 2'E | 277  | SHEPETIVKA              | Ukraine        | 1957/2016 | 1957-2009 | 27617 |
|             |         |         |      |                         |                |           | 2012-2016 | 706   |

|             |         |          |     |                           |               |           |           |       |
|-------------|---------|----------|-----|---------------------------|---------------|-----------|-----------|-------|
| UPM00033345 | 50°24'N | 30°34'E  | 166 | KIEV                      | Ukraine       | 1939/2016 | 1946-2016 | 56416 |
| UPM00033393 | 49°49'N | 23°57'E  | 319 | L'VIV                     | Ukraine       | 1947/2016 | 1947-2016 | 45081 |
| UPM00033506 | 49°36'N | 34°33'E  | 159 | POLTAVA                   | Ukraine       | 1947/1949 | 1947-1949 | 498   |
| UPM00033631 | 48°38'N | 22°16'E  | 118 | UZHGOROD                  | Ukraine       | 1953/2008 | 1953-2008 | 32435 |
| UPM00033658 | 48°22'N | 25°54'E  | 242 | CHERNIVTSI                | Ukraine       | 1950/2016 | 1950-2016 | 34806 |
| UPM00033791 | 48° 2'N | 33°13'E  | 123 | KRYVYI RIH                | Ukraine       | 1949/2016 | 1950-1953 | 888   |
|             |         |          |     |                           |               |           | 1960-2016 | 24853 |
| UPM00033837 | 46°26'N | 30°46'E  | 42  | ODESA                     | Ukraine       | 1939/2016 | 1946-2016 | 36382 |
| UPM00033946 | 44°41'N | 34° 8'E  | 180 | SIMFEROPOL                | Ukraine       | 1950/2010 | 1950-2010 | 43234 |
| UPM00034300 | 49°58'N | 36° 8'E  | 154 | KHARKIV                   | Ukraine       | 1939/2016 | 1947-1949 | 366   |
|             |         |          |     |                           |               |           | 1953-2016 | 35381 |
| USM00070026 | 71°17'N | 156°47'W | 12  | BARROW/W. POST W. ROGERS  | United States | 1932/2016 | 1948-2016 | 49510 |
| USM00070027 | 71°19'N | 156°37'W | 11  | SANDIA LAB. D             | United States | 2008/2008 | 2008-2008 | 523   |
| USM00070086 | 70° 8'N | 143°38'W | 12  | BARTER ISLAND WSO AP      | United States | 1953/1988 | 1953-1988 | 25657 |
| USM00070133 | 66°53'N | 162°37'W | 5   | KOTZEBUE                  | United States | 1942/2016 | 1948-2016 | 47764 |
| USM00070194 | 66°34'N | 145°16'W | 135 | FORT YUKON                | United States | 1976/1978 | 1976-1978 | 126   |
| USM00070200 | 64°31'N | 165°26'W | 7   | NOME                      | United States | 1930/2016 | 1946-1946 | 56    |
|             |         |          |     |                           |               |           | 1948-2016 | 49698 |
| USM00070204 | 63°51'N | 171°36'W | 10  | GAMBELL                   | United States | 1942/1953 | 1948-1953 | 3894  |
| USM00070219 | 60°47'N | 161°51'W | 34  | BETHEL/BETHEL AIRPORT     | United States | 1940/2016 | 1948-2016 | 49406 |
| USM00070231 | 62°57'N | 155°36'W | 103 | MCGRATH                   | United States | 1942/2016 | 1948-2016 | 49298 |
| USM00070261 | 64°49'N | 147°53'W | 134 | FAIRBANKS/INT.            | United States | 1930/2016 | 1948-2016 | 50068 |
| USM00070267 | 64° 0'N | 145°44'W | 391 | FT GREELY/ALLEN AAF       | United States | 1957/1993 | 1969-1971 | 462   |
|             |         |          |     |                           |               |           | 1974-1974 | 28    |
|             |         |          |     |                           |               |           | 1981-1984 | 397   |
|             |         |          |     |                           |               |           | 1986-1986 | 106   |
|             |         |          |     |                           |               |           | 1991-1993 | 249   |
| USM00070270 | 61°16'N | 149°39'W | 115 | FT. RICHARDSON/BRYANT AHP | United States | 1982/2006 | 1982-1987 | 724   |
|             |         |          |     |                           |               |           | 2006-2006 | 242   |
| USM00070273 | 61° 9'N | 149°59'W | 52  | ANCHORAGE/INT.            | United States | 1938/2016 | 1948-2016 | 50303 |
| USM00070291 | 62°58'N | 141°58'W | 524 | NORTHWAY                  | United States | 1942/1955 | 1948-1955 | 5348  |
| USM00070308 | 57° 9'N | 170°13'W | 10  | ST. PAUL ISLANDS          | United States | 1944/2016 | 1948-2016 | 48481 |
| USM00070316 | 55°12'N | 162°43'W | 25  | COLD BAY                  | United States | 1946/2016 | 1946-2016 | 48946 |
| USM00070326 | 58°41'N | 156°39'W | 8   | KING SALMON               | United States | 1953/2016 | 1953-2016 | 44958 |
| USM00070350 | 57°45'N | 152°30'W | 6   | KODIAK                    | United States | 1946/2016 | 1946-2016 | 51276 |
| USM00070361 | 59°31'N | 139°40'W | 11  | YAKUTAT                   | United States | 1942/2016 | 1946-2016 | 50144 |
| USM00070381 | 58°22'N | 134°35'W | 6   | JUNEAU                    | United States | 1931/1953 | 1948-1953 | 3877  |
| USM00070398 | 55° 2'N | 131°35'W | 35  | ANNETTE ISLAND            | United States | 1942/2016 | 1948-2016 | 49926 |
| USM00070409 | 52°48'N | 173°10'E | 27  | ATTU ISLAND               | United States | 1947/1958 | 1947-1950 | 891   |
|             |         |          |     |                           |               |           | 1954-1958 | 2519  |
| USM00070414 | 52°43'N | 174° 6'E | 29  | SHEMYA AFB                | United States | 1946/2016 | 1946-1949 | 1451  |
|             |         |          |     |                           |               |           | 1951-1954 | 3950  |
|             |         |          |     |                           |               |           | 1958-2016 | 36092 |
| USM00070439 | 51°23'N | 179°15'E | 67  | AMCHITKA ISLAND           | United States | 1944/1965 | 1946-1950 | 1737  |
|             |         |          |     |                           |               |           | 1965-1965 | 35    |
| USM00070454 | 51°53'N | 176°39'W | 4   | ADAK (NAS)                | United States | 1943/1996 | 1946-1996 | 32722 |
| USM00070485 | 53°23'N | 167°54'W | 40  | UMNAK ISLAND              | United States | 1944/1950 | 1946-1950 | 2070  |
| USM00070489 | 53°54'N | 166°32'W | 7   | DUTCH HARBOR              | United States | 1950/1954 | 1950-1954 | 2900  |
| USM00072201 | 24°33'N | 81°45'W  | 2   | KEY WEST/INT.             | United States | 1919/2016 | 1954-2016 | 43959 |
| USM00072202 | 25°45'N | 80°23'W  | 4   | MIAMI                     | United States | 1945/2016 | 1948-1977 | 21378 |

|             |         |         |     |                                |               |           |           |       |
|-------------|---------|---------|-----|--------------------------------|---------------|-----------|-----------|-------|
|             |         |         |     |                                |               |           | 1995-2016 | 15666 |
| USM00072203 | 26°41'N | 80° 6'W | 7   | WEST PALM BEACH INTL AP        | United States | 1943/1995 | 1977-1995 | 13399 |
| USM00072206 | 30°29'N | 81°42'W | 10  | JACKSONVILLE/INTNL.            | United States | 1926/2016 | 1955-1969 | 9938  |
|             |         |         |     |                                |               |           | 1995-2016 | 16183 |
| USM00072208 | 32°54'N | 80° 2'W | 13  | CHARLESTON/MUN.                | United States | 1932/2016 | 1948-2016 | 50399 |
| USM00072210 | 27°42'N | 82°24'W | 13  | TAMPA BAY AREA                 | United States | 1931/2016 | 1948-2016 | 50860 |
| USM00072213 | 31°15'N | 82°24'W | 43  | WAYCROSS WARE CO AP            | United States | 1942/1995 | 1969-1995 | 18811 |
| USM00072214 | 30°27'N | 84°18'W | 53  | TALLAHASSEE/MUN.               | United States | 1940/2016 | 1991-2016 | 18821 |
| USM00072215 | 33°32'N | 84°34'W | 245 | PEACHTREE CITY                 | United States | 1994/2016 | 1994-2016 | 16323 |
| USM00072216 | 31°35'N | 84° 7'W | 61  | ALBANY                         | United States | 1956/1960 | 1956-1956 | 272   |
|             |         |         |     |                                |               |           | 1959-1960 | 386   |
| USM00072220 | 29°44'N | 85° 2'W | 6   | APALACHICOLA MUNI              | United States | 1948/1991 | 1948-1948 | 478   |
|             |         |         |     |                                |               |           | 1974-1991 | 12033 |
| USM00072221 | 30°29'N | 86°31'W | 29  | VALPARAISO/EGLIN AFB           | United States | 1938/2016 | 1949-2016 | 51707 |
| USM00072222 | 30°21'N | 87°19'W | 9   | PENSACOLA FOREST SHERMAN NAS   | United States | 1946/1965 | 1955-1956 | 403   |
|             |         |         |     |                                |               |           | 1959-1962 | 221   |
|             |         |         |     |                                |               |           | 1965-1965 | 37    |
| USM00072224 | 29°41'N | 85°21'W | 3   | CAPE SAN BLAS SITE D 3         | United States | 1961/1970 | 1961-1970 | 2506  |
| USM00072225 | 32°20'N | 84°50'W | 130 | FORT BENNING                   | United States | 1969/1989 | 1969-1970 | 203   |
|             |         |         |     |                                |               |           | 1972-1983 | 1456  |
|             |         |         |     |                                |               |           | 1987-1989 | 149   |
| USM00072226 | 32°18'N | 86°24'W | 64  | MONTGOMERY DANNELLY FLD        | United States | 1919/1974 | 1949-1974 | 22088 |
| USM00072228 | 33°34'N | 86°45'W | 192 | BIRMINGHAM MUNI                | United States | 1939/1980 | 1972-1980 | 2169  |
| USM00072229 | 32°54'N | 87°15'W | 55  | CENTREVILLE WSMO               | United States | 1974/1994 | 1974-1994 | 14433 |
| USM00072230 | 33°11'N | 86°47'W | 174 | BIRMINGHAM                     | United States | 1994/2016 | 1994-2016 | 16449 |
| USM00072231 | 29°59'N | 90°15'W | 3   | NEW ORLEANS                    | United States | 1926/1950 | 1948-1950 | 1508  |
| USM00072232 | 29°20'N | 89°24'W | 0   | BOOTHVILLE WSCMO CIT           | United States | 1950/1988 | 1950-1969 | 13571 |
|             |         |         |     |                                |               |           | 1971-1988 | 12306 |
| USM00072233 | 30°20'N | 89°49'W | 10  | SLIDELL/MUN. LA                | United States | 1988/2016 | 1988-2016 | 21173 |
| USM00072235 | 32°19'N | 90° 5'W | 91  | JACKSON/ALLEN C. THOMPSON FIEL | United States | 1932/2016 | 1953-2016 | 45483 |
| USM00072238 | 33°29'N | 90°59'W | 40  | GREENVILLE                     | United States | 1942/1954 | 1954-1954 | 191   |
| USM00072239 | 31° 2'N | 93° 2'W | 110 | FORT POLK (ARMY)               | United States | 1976/1989 | 1976-1984 | 1010  |
|             |         |         |     |                                |               |           | 1986-1986 | 116   |
|             |         |         |     |                                |               |           | 1988-1989 | 89    |
| USM00072240 | 30° 8'N | 93°13'W | 5   | LAKE CHARLES/MUN.              | United States | 1940/2016 | 1948-2016 | 50998 |
| USM00072243 | 29°58'N | 95°21'W | 33  | HOUSTON/INTERCONTIN            | United States | 1971/1979 | 1971-1979 | 1782  |
| USM00072244 | 30°38'N | 96°29'W | 82  | BRYAN                          | United States | 1954/1958 | 1954-1958 | 2540  |
| USM00072247 | 32°21'N | 94°39'W | 124 | LONGVIEW WSMO                  | United States | 1975/1995 | 1975-1995 | 14443 |
| USM00072248 | 32°27'N | 93°50'W | 85  | SHREVEPORT/REG.                | United States | 1949/2016 | 1949-1975 | 21865 |
|             |         |         |     |                                |               |           | 1995-2016 | 16069 |
| USM00072249 | 32°50'N | 97°18'W | 195 | FORT WORTH                     | United States | 1937/2016 | 1948-1973 | 22755 |
|             |         |         |     |                                |               |           | 1994-2016 | 16753 |
| USM00072250 | 25°55'N | 97°25'W | 7   | BROWNSVILLE/INT.               | United States | 1929/2016 | 1948-2016 | 50233 |
| USM00072251 | 27°47'N | 97°30'W | 15  | CORPUS CHRISTI/INT.            | United States | 1953/2016 | 1953-1959 | 3794  |
|             |         |         |     |                                |               |           | 1961-1966 | 2445  |
|             |         |         |     |                                |               |           | 1989-2016 | 19944 |
| USM00072253 | 29°32'N | 98°28'W | 243 | SAN ANTONIO INTL AP            | United States | 1939/1966 | 1948-1966 | 13578 |
| USM00072255 | 28°51'N | 96°55'W | 33  | VICTORIA RGNL AP               | United States | 1942/1989 | 1966-1989 | 17191 |
| USM00072256 | 31°37'N | 97°13'W | 157 | WACO RGNL                      | United States | 1940/1976 | 1952-1952 | 92    |
| USM00072257 | 31° 6'N | 97°43'W | 282 | FT HOOD AAF/KILLEEN            | United States | 1969/1991 | 1969-1986 | 2496  |

|             |         |          |      |                              |               |           |           |       |
|-------------|---------|----------|------|------------------------------|---------------|-----------|-----------|-------|
|             |         |          |      |                              |               |           | 1988-1991 | 330   |
| USM00072260 | 32°13'N | 98°11'W  | 399  | STEPHENVILLE                 | United States | 1973/1994 | 1973-1994 | 15226 |
| USM00072261 | 29°22'N | 100°55'W | 314  | DEL RIO/INT.                 | United States | 1954/2016 | 1954-2016 | 48511 |
| USM00072263 | 31°25'N | 100°24'W | 573  | MATHIS FLD/S. ANGELO         | United States | 1942/1970 | 1953-1953 | 264   |
|             |         |          |      |                              |               |           | 1964-1970 | 1198  |
| USM00072264 | 30°22'N | 104° 1'W | 1481 | MARFA MUNI (AMOS)            | United States | 1929/1959 | 1959-1959 | 192   |
| USM00072265 | 31°57'N | 102°11'W | 875  | MIDLAND/MIDLAND REG. AIRTERM | United States | 1930/2016 | 1953-2016 | 43018 |
| USM00072266 | 32°26'N | 99°41'W  | 534  | ABILENE                      | United States | 1935/1972 | 1957-1961 | 1142  |
|             |         |          |      |                              |               |           | 1963-1972 | 2270  |
| USM00072267 | 33°39'N | 101°49'W | 988  | LUBBOCK/MUNI (TEX)           | United States | 1950/1964 | 1950-1950 | 63    |
|             |         |          |      |                              |               |           | 1952-1952 | 64    |
|             |         |          |      |                              |               |           | 1960-1961 | 366   |
|             |         |          |      |                              |               |           | 1964-1964 | 192   |
| USM00072269 | 32°23'N | 106°29'W | 1218 | WHITE SANDS TEST RG          | United States | 1949/1972 | 1949-1960 | 4912  |
|             |         |          |      |                              |               |           | 1969-1972 | 297   |
| USM00072273 | 31°35'N | 110°20'W | 1428 | FORT HUACHUCA                | United States | 1955/1995 | 1955-1973 | 6793  |
|             |         |          |      |                              |               |           | 1985-1995 | 2387  |
| USM00072274 | 32°14'N | 110°57'W | 741  | TUCSON                       | United States | 1932/2016 | 1951-2016 | 50831 |
| USM00072278 | 33°26'N | 112°12'W | 344  | PHOENIX/SKY HARBOR           | United States | 1948/1998 | 1948-1957 | 7198  |
|             |         |          |      |                              |               |           | 1998-1998 | 57    |
| USM00072280 | 32°39'N | 114°36'W | 63   | YUMA INTL AIRPORT            | United States | 1929/2004 | 1955-1973 | 8001  |
|             |         |          |      |                              |               |           | 1975-1976 | 164   |
|             |         |          |      |                              |               |           | 2000-2004 | 570   |
| USM00072281 | 32°49'N | 115°41'W | -18  | EL CENTRO NAF                | United States | 1962/1991 | 1962-1968 | 1312  |
| USM00072293 | 32°50'N | 117° 7'W | 134  | SAN DIEGO/MIRAMAR            | United States | 1946/2016 | 1946-2016 | 51324 |
| USM00072295 | 33°56'N | 118°24'W | 32   | LOS ANGELES INTL             | United States | 1926/1979 | 1956-1979 | 14129 |
| USM00072297 | 33°49'N | 118° 9'W | 20   | LONG BEACH                   | United States | 1943/1956 | 1948-1956 | 6799  |
| USM00072304 | 35°16'N | 75°33'W  | 8    | CAPE HATTERAS WB BLDG        | United States | 1941/1994 | 1948-1994 | 33753 |
| USM00072305 | 34°47'N | 76°53'W  | 11   | NEWPORT                      | United States | 1994/2016 | 1994-2016 | 16549 |
| USM00072308 | 36°53'N | 76°12'W  | 9    | NORFOLK/MUNI (VA)            | United States | 1940/1965 | 1946-1965 | 18377 |
| USM00072311 | 33°57'N | 83°19'W  | 245  | ATHENS BEN EPPS AP           | United States | 1955/1994 | 1955-1994 | 25613 |
| USM00072317 | 36° 6'N | 79°57'W  | 277  | GREENSBORO/G.-HIGH PT.       | United States | 1928/2016 | 1948-2016 | 50629 |
| USM00072318 | 37°12'N | 80°25'W  | 639  | BLACKSBURG                   | United States | 1995/2016 | 1995-2016 | 15410 |
| USM00072326 | 35°49'N | 83°59'W  | 299  | KNOXVILLE MUNICIPAL          | United States | 1927/1973 | 1955-1956 | 595   |
| USM00072327 | 36°15'N | 86°34'W  | 180  | NASHVILLE/OLD HICKORY        | United States | 1937/2016 | 1948-2016 | 50741 |
| USM00072340 | 34°50'N | 92°16'W  | 173  | LITTLE ROCK/ADAMS FLD        | United States | 1939/2016 | 1948-1972 | 17521 |
|             |         |          |      |                              |               |           | 1975-2016 | 30083 |
| USM00072344 | 35°20'N | 94°22'W  | 141  | FT SMITH CAMP CHAFFEE        | United States | 1953/1964 | 1953-1961 | 4845  |
|             |         |          |      |                              |               |           | 1963-1964 | 396   |
| USM00072349 | 36°53'N | 93°54'W  | 439  | MONETT                       | United States | 1970/1995 | 1970-1995 | 18068 |
| USM00072351 | 33°59'N | 98°30'W  | 309  | WICHITA FALLS                | United States | 1950/1950 | 1950-1950 | 109   |
| USM00072352 | 34°39'N | 99°16'W  | 420  | ALTUS AFB (OKLA)             | United States | 1954/1961 | 1954-1958 | 2440  |
|             |         |          |      |                              |               |           | 1961-1961 | 229   |
| USM00072354 | 35°25'N | 97°23'W  | 397  | TINKER AFB                   | United States | 1926/1973 | 1952-1973 | 18939 |
| USM00072355 | 34°39'N | 98°24'W  | 360  | FORT SILL                    | United States | 1918/2008 | 1952-1952 | 107   |
|             |         |          |      |                              |               |           | 1960-1960 | 82    |
|             |         |          |      |                              |               |           | 1970-1974 | 546   |
|             |         |          |      |                              |               |           | 1976-2000 | 7855  |
|             |         |          |      |                              |               |           | 2002-2008 | 1595  |
| USM00072357 | 35°11'N | 97°26'W  | 345  | NORMAN/MAX WESTHEIMER A      | United States | 1974/2016 | 1974-1974 | 730   |

|             |         |          |      |                          |               |           |           |       |
|-------------|---------|----------|------|--------------------------|---------------|-----------|-----------|-------|
|             |         |          |      |                          |               |           | 1989-2016 | 20597 |
| USM00072363 | 35°14'N | 101°43'W | 1095 | AMARILLO/INTL.           | United States | 1932/2016 | 1952-2016 | 51088 |
| USM00072364 | 31°52'N | 106°42'W | 1254 | SANTA TERESA             | United States | 1932/2016 | 1948-2016 | 50052 |
| USM00072365 | 35° 2'N | 106°37'W | 1619 | ALBUQUERQUE/INT.         | United States | 1931/2016 | 1948-2016 | 50249 |
| USM00072374 | 35° 2'N | 110°43'W | 1489 | WINSLOW MUNI AP          | United States | 1931/1995 | 1961-1995 | 23987 |
| USM00072376 | 35°14'N | 111°49'W | 2179 | FLAGSTAFF                | United States | 1995/2016 | 1995-2016 | 15417 |
| USM00072381 | 34°55'N | 117°54'W | 705  | EDWARDS AFB              | United States | 1942/2016 | 1952-2016 | 18766 |
| USM00072383 | 34°45'N | 118°44'W | 1379 | SANDBURG (AUT)           | United States | 1932/1975 | 1968-1968 | 39    |
| USM00072385 | 36°57'N | 116° 3'W | 1197 | YUCCA FLATS TEST 21      | United States | 1956/1996 | 1956-1978 | 12672 |
|             |         |          |      |                          |               |           | 1996-1996 | 29    |
| USM00072387 | 36°37'N | 116° 2'W | 1007 | MERCURY DESERT ROCK AP   | United States | 1951/2010 | 1951-1953 | 1528  |
|             |         |          |      |                          |               |           | 1955-1955 | 286   |
|             |         |          |      |                          |               |           | 1978-2010 | 21816 |
| USM00072388 | 36° 3'N | 115°11'W | 697  | LAS VEGAS                | United States | 1935/2016 | 1948-1966 | 13833 |
|             |         |          |      |                          |               |           | 2010-2016 | 4361  |
| USM00072389 | 36°46'N | 119°43'W | 100  | FRESNO AIRTERM           | United States | 1929/1974 | 1955-1955 | 183   |
|             |         |          |      |                          |               |           | 1971-1974 | 328   |
| USM00072391 | 34° 7'N | 119° 7'W |      | POINT MUGU/NAS           | United States | 1948/2016 | 1952-1961 | 1525  |
|             |         |          |      |                          |               |           | 1963-1995 | 13920 |
|             |         |          |      |                          |               |           | 2004-2016 | 1527  |
| USM00072393 | 34°45'N | 120°34'W | 121  | VANDENBERG AFB           | United States | 1958/2016 | 1958-2016 | 40488 |
| USM00072394 | 34°54'N | 120°27'W | 73   | SANTA MARIA/PUBLIC (CAL) | United States | 1947/1959 | 1948-1959 | 8473  |
| USM00072402 | 37°56'N | 75°29'W  | 12   | WALLOPS ISLAND           | United States | 1963/2016 | 1963-2016 | 39329 |
| USM00072403 | 38°59'N | 77°29'W  | 88   | STERLING                 | United States | 1960/2016 | 1960-2016 | 41416 |
| USM00072405 | 38°51'N | 77° 2'W  | 20   | WASHINGTON/NATIONAL      | United States | 1919/1973 | 1950-1960 | 9926  |
|             |         |          |      |                          |               |           | 1973-1973 | 76    |
| USM00072407 | 39°27'N | 74°40'W  | 23   | ATLANTIC CITY U-A        | United States | 1980/1994 | 1980-1994 | 10118 |
| USM00072408 | 39°53'N | 75°15'W  | 9    | PHILADELPHIA INTL        | United States | 1940/1975 | 1969-1975 | 1369  |
| USM00072409 | 40° 2'N | 74°19'W  | 32   | LAKEHURST                | United States | 1946/1955 | 1946-1955 | 5461  |
| USM00072414 | 38°22'N | 81°36'W  | 299  | YEAGER                   | United States | 1972/1979 | 1972-1979 | 1416  |
| USM00072424 | 37°54'N | 85°58'W  | 230  | FORT KNOX/GODMAN         | United States | 1919/1988 | 1954-1954 | 337   |
|             |         |          |      |                          |               |           | 1971-1973 | 810   |
|             |         |          |      |                          |               |           | 1984-1988 | 381   |
| USM00072425 | 38°22'N | 82°33'W  | 255  | HUNTINGTON TRI STATE AP  | United States | 1940/1995 | 1948-1948 | 488   |
|             |         |          |      |                          |               |           | 1961-1995 | 24466 |
| USM00072426 | 39°25'N | 83°49'W  | 323  | WILMINGTON               | United States | 1943/2016 | 1947-1948 | 316   |
|             |         |          |      |                          |               |           | 1995-2016 | 15515 |
| USM00072433 | 38°39'N | 88°58'W  | 175  | SALEM LECKRONE AP        | United States | 1954/1988 | 1954-1955 | 707   |
|             |         |          |      |                          |               |           | 1959-1959 | 273   |
|             |         |          |      |                          |               |           | 1969-1988 | 14242 |
| USM00072434 | 38°45'N | 90°22'W  | 172  | ST. LOUIS/LAMBERT        | United States | 1929/1975 | 1969-1973 | 1171  |
| USM00072435 | 37° 4'N | 88°46'W  | 124  | PADUCAH BARKLEY FLD      | United States | 1988/1995 | 1988-1995 | 4387  |
| USM00072436 | 39°16'N | 85°54'W  | 203  | COLUMBUS                 | United States | 1943/1955 | 1955-1955 | 332   |
| USM00072440 | 37°14'N | 93°24'W  | 391  | SPRINGFIELD/MUN.         | United States | 1939/2016 | 1995-2016 | 16053 |
| USM00072445 | 38°49'N | 92°13'W  | 274  | COLUMBIA REGIONAL        | United States | 1946/1974 | 1948-1970 | 16721 |
| USM00072450 | 37°39'N | 97°26'W  | 409  | WICHITA/MID-CONTINE      | United States | 1930/1975 | 1952-1952 | 245   |
| USM00072451 | 37°46'N | 99°58'W  | 786  | DODGE CITY/MUN.          | United States | 1940/2016 | 1948-2016 | 51129 |
| USM00072455 | 39° 6'N | 96°46'W  | 320  | FT RILEY/MARSHALL A      | United States | 1958/1989 | 1958-1958 | 294   |
|             |         |          |      |                          |               |           | 1970-1973 | 243   |
|             |         |          |      |                          |               |           | 1975-1981 | 482   |



|             |         |          |      |                              |               |           |           |       |
|-------------|---------|----------|------|------------------------------|---------------|-----------|-----------|-------|
|             |         |          |      |                              |               |           | 1984-1984 | 34    |
|             |         |          |      |                              |               |           | 1986-1987 | 139   |
|             |         |          |      |                              |               |           | 1989-1989 | 29    |
| USM00072456 | 39° 4'N | 95°38'W  | 268  | TOPEKA/MUN.                  | United States | 1953/2016 | 1955-2016 | 43382 |
| USM00072457 | 39°22'N | 94°55'W  | 274  | FT. LEAVENWORTH              | United States | 1929/1953 | 1949-1953 | 3086  |
| USM00072465 | 39°22'N | 101°42'W | 1115 | GOODLAND/RENNER FIE          | United States | 1944/1974 | 1952-1956 | 1646  |
|             |         |          |      |                              |               |           | 1958-1961 | 1113  |
| USM00072468 | 38°42'N | 104°46'W | 1789 | FORT CARSON/BUTTS            | United States | 1971/1998 | 1971-1998 | 5684  |
| USM00072469 | 39°46'N | 104°52'W | 1611 | DENVER/STAPLETON INT.        | United States | 1919/2016 | 1948-2016 | 55539 |
| USM00072476 | 39° 7'N | 108°32'W | 1474 | GRAND JUNCTION/WALKER FIELD  | United States | 1938/2016 | 1948-2016 | 50037 |
| USM00072481 | 37°22'N | 120°34'W | 58   | CASTLE AFB                   | United States | 1942/1963 | 1952-1956 | 956   |
|             |         |          |      |                              |               |           | 1959-1963 | 1257  |
| USM00072483 | 38°31'N | 121°30'W | 8    | SACRAMENTO/EXECUTIV          | United States | 1938/1974 | 1965-1966 | 329   |
| USM00072485 | 38° 4'N | 117° 5'W | 1656 | TONAPAH APRT (NEV)           | United States | 1942/1958 | 1953-1953 | 278   |
|             |         |          |      |                              |               |           | 1955-1958 | 1439  |
| USM00072486 | 39°18'N | 114°51'W | 1907 | ELY YELLAND FLD AP           | United States | 1938/1995 | 1948-1995 | 34554 |
| USM00072489 | 39°34'N | 119°48'W | 1518 | RENO                         | United States | 1927/2016 | 1953-1953 | 222   |
|             |         |          |      |                              |               |           | 1955-1955 | 286   |
|             |         |          |      |                              |               |           | 1957-1957 | 467   |
|             |         |          |      |                              |               |           | 1994-2016 | 16168 |
| USM00072493 | 37°45'N | 122°13'W | 3    | OAKLAND/METROP. OAKLAND INT. | United States | 1928/2016 | 1948-2016 | 52389 |
| USM00072497 | 39°47'N | 121°51'W | 25   | CHICO MUNI                   | United States | 1942/1971 | 1962-1971 | 1355  |
| USM00072501 | 40°52'N | 72°52'W  | 20   | UPTON                        | United States | 1994/2016 | 1994-2016 | 16262 |
| USM00072503 | 40°47'N | 73°52'W  | 6    | LA GUARDIA                   | United States | 1939/1972 | 1969-1972 | 746   |
| USM00072506 | 41°15'N | 70° 4'W  | 14   | NANTUCKET MEM AP             | United States | 1941/1970 | 1948-1970 | 16412 |
| USM00072509 | 42°22'N | 71° 2'W  | 6    | BOSTON/LOGAN INTL            | United States | 1926/1973 | 1971-1973 | 592   |
| USM00072518 | 42°42'N | 73°50'W  | 93   | ALBANY                       | United States | 1930/2016 | 1948-1951 | 1655  |
|             |         |          |      |                              |               |           | 1955-2016 | 45760 |
| USM00072520 | 40°32'N | 80°13'W  | 361  | PITTSBURGH                   | United States | 1934/2016 | 1948-2016 | 53577 |
| USM00072524 | 41°25'N | 81°52'W  | 245  | CLEVELAND                    | United States | 1926/1973 | 1971-1973 | 609   |
| USM00072528 | 42°56'N | 78°43'W  | 218  | BUFFALO/GREATER BUFFALO INT. | United States | 1929/2016 | 1948-2016 | 52725 |
| USM00072531 | 40°18'N | 88° 9'W  | 227  | RANTOUL                      | United States | 1922/1956 | 1949-1956 | 10343 |
| USM00072532 | 40°40'N | 89°41'W  | 206  | PEORIA GTR PEORIA AP         | United States | 1956/1995 | 1956-1995 | 28992 |
| USM00072534 | 41°47'N | 87°45'W  | 190  | CHICAGO/MIDWAY               | United States | 1928/1979 | 1969-1979 | 3079  |
| USM00072535 | 41°42'N | 86°19'W  | 236  | SOUTH BEND ST JOSEPH         | United States | 1959/1961 | 1959-1961 | 606   |
| USM00072536 | 41°36'N | 83°48'W  | 211  | TOLEDO EXPRESS               | United States | 1939/1974 | 1948-1951 | 2830  |
| USM00072537 | 42°19'N | 83°14'W  | 187  | DETROIT METRO.               | United States | 1949/1972 | 1949-1956 | 10486 |
|             |         |          |      |                              |               |           | 1972-1972 | 55    |
| USM00072545 | 42° 5'N | 91°37'W  | 265  | CEDAR RAPIDS ECHO SI         | United States | 1954/1961 | 1954-1955 | 851   |
|             |         |          |      |                              |               |           | 1960-1961 | 458   |
| USM00072548 | 42°33'N | 92°24'W  | 255  | WATERLOO                     | United States | 1953/1959 | 1953-1953 | 451   |
|             |         |          |      |                              |               |           | 1959-1959 | 291   |
| USM00072558 | 41°19'N | 96°22'W  | 352  | VALLEY                       | United States | 1926/2016 | 1948-2016 | 50654 |
| USM00072562 | 41° 8'N | 100°42'W | 849  | NORTH PLATTE/LEE BIRD        | United States | 1930/2016 | 1948-2016 | 51070 |
| USM00072563 | 41°13'N | 103° 6'W | 1341 | SYDNEY                       | United States | 1955/1957 | 1955-1955 | 356   |
|             |         |          |      |                              |               |           | 1957-1957 | 320   |
| USM00072566 | 41°52'N | 103°35'W | 1207 | SCOTTSDLUFF AAF              | United States | 1953/1961 | 1953-1953 | 477   |
|             |         |          |      |                              |               |           | 1958-1958 | 30    |
|             |         |          |      |                              |               |           | 1960-1961 | 445   |
| USM00072572 | 40°46'N | 111°57'W | 1289 | SALT LAKE CITY/INTNL UT.     | United States | 1926/2016 | 1956-2016 | 44871 |

|             |         |          |      |                                    |               |           |           |       |
|-------------|---------|----------|------|------------------------------------|---------------|-----------|-----------|-------|
| USM00072575 | 41°11'N | 112° 1'W | 1346 | OGDEN                              | United States | 1948/1956 | 1948-1948 | 487   |
|             |         |          |      |                                    |               |           | 1950-1956 | 6131  |
| USM00072576 | 42°49'N | 108°44'W | 1695 | LANDER HUNT FLD AP                 | United States | 1948/1995 | 1948-1995 | 34501 |
| USM00072582 | 40°52'N | 115°45'W | 1593 | ELKO                               | United States | 1931/2016 | 1995-2016 | 15546 |
| USM00072583 | 40°54'N | 117°48'W | 1310 | WINNEMUCCA MUNI AP                 | United States | 1935/1994 | 1956-1994 | 27727 |
| USM00072597 | 42°23'N | 122°53'W | 398  | MEDFORD/MED-JACKSON COUNTY         | United States | 1926/2016 | 1948-2016 | 50521 |
| USM00072632 | 42°42'N | 83°28'W  | 330  | WHITE LAKE                         | United States | 1994/2016 | 1994-2016 | 16027 |
| USM00072634 | 44°54'N | 84°43'W  | 448  | GAYLORD                            | United States | 1996/2016 | 1996-2016 | 14959 |
| USM00072637 | 42°58'N | 83°45'W  | 234  | FLINT BISHOP AP                    | United States | 1956/1994 | 1956-1994 | 28300 |
| USM00072645 | 44°30'N | 88° 7'W  | 209  | GREEN BAY/A.-STRAUBEL              | United States | 1940/2016 | 1953-2016 | 46246 |
| USM00072649 | 44°51'N | 93°34'W  | 290  | CHANHASSEN                         | United States | 1937/2016 | 1995-2016 | 15652 |
| USM00072654 | 44°23'N | 98°13'W  | 392  | HURON RGNL AP                      | United States | 1938/1994 | 1953-1955 | 1206  |
|             |         |          |      |                                    |               |           | 1957-1961 | 1306  |
|             |         |          |      |                                    |               |           | 1963-1994 | 17643 |
| USM00072655 | 45°33'N | 94° 4'W  | 316  | ST CLOUD MUNI AP                   | United States | 1948/1995 | 1948-1995 | 34902 |
| USM00072659 | 45°27'N | 98°25'W  | 398  | ABERDEEN/REG.                      | United States | 1994/2016 | 1994-2016 | 16159 |
| USM00072662 | 44° 4'N | 103°13'W | 1029 | RAPID CITY WFO                     | United States | 1939/2016 | 1948-2016 | 50355 |
| USM00072672 | 43° 4'N | 108°24'W | 1699 | RIVERTON                           | United States | 1995/2016 | 1995-2016 | 15342 |
| USM00072681 | 43°34'N | 116°13'W | 873  | BOISE/MUN.                         | United States | 1926/2016 | 1957-2016 | 39302 |
| USM00072694 | 44°55'N | 123° 0'W | 62   | SALEM/MCNARY                       | United States | 1956/2016 | 1956-2016 | 45171 |
| USM00072698 | 45°32'N | 122°41'W | 8    | PORTLAND INTL                      | United States | 1928/1972 | 1946-1946 | 35    |
|             |         |          |      |                                    |               |           | 1953-1956 | 4712  |
|             |         |          |      |                                    |               |           | 1972-1972 | 48    |
| USM00072712 | 46°52'N | 68° 1'W  | 191  | CARIBOU/MUN.                       | United States | 1940/2016 | 1948-2016 | 50269 |
| USM00072734 | 46°28'N | 84°21'W  | 219  | SAULT STE MAR+E793IE SANDERSON FLD | United States | 1926/1996 | 1948-1996 | 39850 |
| USM00072747 | 48°34'N | 93°24'W  | 357  | INT.FALLS/FALLS INT. MN.           | United States | 1942/2016 | 1948-2016 | 49946 |
| USM00072764 | 46°46'N | 100°46'W | 506  | BISMARCK/MUN.                      | United States | 1932/2016 | 1948-2016 | 50393 |
| USM00072768 | 48°12'N | 106°38'W | 693  | GLASGOW/INT.                       | United States | 1943/2016 | 1948-2016 | 50264 |
| USM00072776 | 47°28'N | 111°23'W | 1132 | GREAT FALLS                        | United States | 1940/2016 | 1948-2016 | 50146 |
| USM00072786 | 47°41'N | 117°38'W | 729  | SPOKANE                            | United States | 1926/2016 | 1948-2016 | 51438 |
| USM00072792 | 46°58'N | 122°54'W | 66   | OLYMPIA MUN I AP                   | United States | 1962/1964 | 1962-1964 | 1123  |
| USM00072793 | 47°27'N | 122°18'W | 137  | SEATTLE-TACOMA INTL                | United States | 1944/1981 | 1946-1962 | 13356 |
|             |         |          |      |                                    |               |           | 1971-1981 | 1985  |
| USM00072797 | 47°56'N | 124°34'W | 57   | QUILLAYUTE                         | United States | 1966/2016 | 1966-2016 | 36564 |
| USM00072798 | 48°23'N | 124°44'W | 35   | TATOOSH ISLAND WB                  | United States | 1940/1966 | 1948-1966 | 13447 |
| USM00074001 | 34°36'N | 86°38'W  | 175  | REDSTONE ARSENAL                   | United States | 1992/2016 | 1992-1998 | 1195  |
|             |         |          |      |                                    |               |           | 2006-2014 | 1377  |
|             |         |          |      |                                    |               |           | 2016-2016 | 1     |
| USM00074002 | 39°30'N | 76°10'W  | 5    | ABERDEEN PRVGR                     | United States | 1918/2016 | 1992-2016 | 5431  |
| USM00074004 | 32°50'N | 114°24'W | 231  | YUMA PROVING GROUNDS AZ            | United States | 1992/2016 | 1992-1995 | 458   |
|             |         |          |      |                                    |               |           | 2000-2016 | 8430  |
| USM00074005 | 32°52'N | 114° 2'W | 231  | YUMA PG TOWER 31 AKA               | United States | 2008/2008 | 2008-2008 | 415   |
| USM00074207 | 47° 7'N | 122°35'W | 92   | GRAY AAF                           | United States | 1920/1972 | 1970-1972 | 240   |
| USM00074389 | 43°54'N | 70°15'W  | 125  | GRAY                               | United States | 1940/2016 | 1948-2016 | 50489 |
| USM00074392 | 43°53'N | 69°56'W  | 36   | BRUNSWICK                          | United States | 1953/1955 | 1953-1955 | 954   |
| USM00074455 | 41°37'N | 90°35'W  | 231  | QUAD CITY                          | United States | 1935/2016 | 1995-2016 | 15923 |
| USM00074479 | 40°26'N | 80° 0'W  | 229  | PITTSBURGH/EMSU                    | United States | 1971/1972 | 1971-1972 | 382   |
| USM00074482 | 41°30'N | 74° 6'W  | 138  | NEWBURGH/STEWART AFB               | United States | 1942/1951 | 1949-1951 | 1207  |
| USM00074486 | 40°39'N | 73°47'W  | 10   | NEW YORK JFK AP                    | United States | 1952/1980 | 1952-1980 | 24906 |
| USM00074494 | 41°39'N | 69°58'W  | 15   | CHATHAM                            | United States | 1970/2016 | 1970-2016 | 33815 |

|             |         |          |      |                        |               |           |           |       |
|-------------|---------|----------|------|------------------------|---------------|-----------|-----------|-------|
| USM00074505 | 37°19'N | 121°52'W | 31   | SAN JOSE/EMSU          | United States | 1971/1972 | 1971-1972 | 181   |
| USM00074544 | 38°52'N | 98°49'W  | 569  | RUSSELL                | United States | 1952/1952 | 1952-1952 | 274   |
| USM00074560 | 40° 9'N | 89°20'W  | 179  | LINCOLN                | United States | 1995/2016 | 1995-2016 | 16167 |
| USM00074570 | 39°50'N | 84° 3'W  | 250  | DAYTON W PATTERSON AFB | United States | 1918/1995 | 1951-1995 | 35763 |
| USM00074574 | 38°20'N | 77° 2'W  | 7    | DAHLGREN               | United States | 1946/1959 | 1946-1959 | 2788  |
| USM00074606 | 34°39'N | 120°34'W | 112  | SOUTH VANDENBERG AF    | United States | 1966/2001 | 1966-1970 | 2128  |
|             |         |          |      |                        |               |           | 1974-1975 | 62    |
|             |         |          |      |                        |               |           | 1984-2001 | 4005  |
| USM00074612 | 35°41'N | 117°41'W | 696  | CHINA LAKE             | United States | 1946/2016 | 1946-1946 | 54    |
|             |         |          |      |                        |               |           | 1948-1956 | 1388  |
|             |         |          |      |                        |               |           | 1958-1959 | 219   |
|             |         |          |      |                        |               |           | 1964-1997 | 10449 |
|             |         |          |      |                        |               |           | 2016-2016 | 33    |
| USM00074626 | 33°27'N | 111°57'W | 386  | WFO PHOENIX            | United States | 2000/2016 | 2000-2016 | 4059  |
| USM00074630 | 33°48'N | 106°40'W | 1506 | STALLION SITE          | United States | 1956/1960 | 1956-1960 | 590   |
| USM00074631 | 33°10'N | 106°30'W | 1235 | WHITE SANDS MISSILE    | United States | 1956/1983 | 1956-1960 | 1343  |
|             |         |          |      |                        |               |           | 1982-1983 | 149   |
| USM00074641 | 36°18'N | 99°47'W  | 669  | GAGE                   | United States | 1952/2002 | 1952-1952 | 208   |
|             |         |          |      |                        |               |           | 2000-2000 | 250   |
|             |         |          |      |                        |               |           | 2002-2002 | 120   |
| USM00074646 | 36°36'N | 97°30'W  | 306  | LAMONT                 | United States | 2000/2016 | 2000-2002 | 2994  |
|             |         |          |      |                        |               |           | 2004-2016 | 14423 |
| USM00074671 | 36°40'N | 87°30'W  | 174  | FORT CAMPBELL (AAF)    | United States | 1943/1995 | 1985-1990 | 695   |
|             |         |          |      |                        |               |           | 1992-1995 | 322   |
| USM00074693 | 35° 8'N | 78°56'W  | 74   | FORT BRAGG/SIMMONS     | United States | 1984/1988 | 1984-1985 | 79    |
|             |         |          |      |                        |               |           | 1987-1988 | 80    |
| USM00074732 | 32°54'N | 106° 6'W | 1258 | HOLLOMAN AFB           | United States | 1949/1994 | 1949-1971 | 9334  |
|             |         |          |      |                        |               |           | 1981-1982 | 151   |
|             |         |          |      |                        |               |           | 1984-1994 | 1412  |
| USM00074754 | 31°20'N | 92°33'W  | 27   | ALEXANDRIA             | United States | 1943/1955 | 1955-1955 | 216   |
| USM00074768 | 30°22'N | 89°35'W  | 9    | NASA MISS. TEST        | United States | 1969/1971 | 1969-1971 | 1064  |
| USM00074777 | 30°26'N | 86°41'W  | 12   | HURLBURT FIELD (AF)    | United States | 1987/1991 | 1987-1991 | 370   |
| USM00074780 | 31°52'N | 81°38'W  | 27   | FORT STEWART RESERV    | United States | 1978/1993 | 1978-1993 | 3593  |
| USM00074794 | 28°28'N | 80°33'W  | 3    | CAPE KENNEDY           | United States | 1950/2016 | 1950-2016 | 53109 |
| USM00091162 | 22° 2'N | 159°47'W | 5    | BARKING SANDS          | United States | 1942/1975 | 1963-1975 | 3089  |
| USM00091165 | 21°60'N | 159°21'W | 32   | LIHUE                  | United States | 1950/2016 | 1950-2016 | 49046 |
| USM00091170 | 21°29'N | 158° 2'W | 256  | WAHIAWA                | United States | 1929/1989 | 1973-1989 | 2432  |
| USM00091176 | 21°26'N | 157°46'W | 1    | KANEOHE BAY (MCAF)     | United States | 1974/2003 | 2003-2003 | 50    |
| USM00091182 | 21°21'N | 157°56'W | 5    | HONOLULU INTL          | United States | 1941/1996 | 1946-1946 | 54    |
|             |         |          |      |                        |               |           | 1948-1953 | 3014  |
| USM00091285 | 19°43'N | 155° 3'W | 11   | HILO HI                | United States | 1943/2016 | 1950-2016 | 47466 |
| USW00003123 | 33°24'N | 117°30'W | 69   | CAMP PENDLETON         | United States | 1954/1954 | 1954-1954 | 171   |
| USW00003134 | 35°16'N | 116° 5'W | 281  | BAKER                  | United States | 1957/1957 | 1957-1957 | 493   |
| USW00003143 | 36°48'N | 116°16'W | 1101 | JACKASS FLATS          | United States | 1959/1967 | 1959-1959 | 149   |
|             |         |          |      |                        |               |           | 1961-1961 | 358   |
|             |         |          |      |                        |               |           | 1967-1967 | 30    |
| USW00012880 | 25°54'N | 81°43'W  | 3    | DELTA SEVEN            | United States | 1961/1962 | 1961-1962 | 434   |
| USW00012881 | 27°57'N | 80°34'W  | 9    | VALKARIA               | United States | 1962/1967 | 1962-1967 | 798   |
| USW00012906 | 29°37'N | 95°10'W  | 10   | HOUSTON ELLINGTON AFB  | United States | 1918/1963 | 1953-1953 | 276   |
|             |         |          |      |                        |               |           | 1959-1961 | 607   |

|             |         |          |      |                         |               |           |           |       |
|-------------|---------|----------|------|-------------------------|---------------|-----------|-----------|-------|
|             |         |          |      |                         |               |           | 1963-1963 | 188   |
| USW00013814 | 35°58'N | 89°57'W  | 82   | BLYTHEVILLE AFB         | United States | 1957/1964 | 1957-1958 | 436   |
|             |         |          |      |                         |               |           | 1960-1961 | 409   |
|             |         |          |      |                         |               |           | 1963-1964 | 530   |
| USW00013903 | 34°18'N | 97° 1'W  | 222  | ARDMORE AFB             | United States | 1943/1961 | 1961-1961 | 165   |
| USW00013909 | 36°20'N | 97°40'W  | 396  | ENID/VANCE AFB          | United States | 1942/1951 | 1950-1951 | 230   |
| USW00014704 | 41°39'N | 70°31'W  | 42   | FALMOUTH OTIS AFB       | United States | 1964/1965 | 1964-1965 | 383   |
| USW00014725 | 40°18'N | 74° 3'W  | 16   | FT. MONMOUTH            | United States | 1929/1948 | 1948-1948 | 73    |
| USW00023021 | 33°35'N | 102°14'W | 1014 | REESE AFB               | United States | 1942/1964 | 1950-1950 | 63    |
|             |         |          |      |                         |               |           | 1952-1952 | 64    |
|             |         |          |      |                         |               |           | 1960-1961 | 364   |
|             |         |          |      |                         |               |           | 1964-1964 | 191   |
| USW00026636 | 68° 6'N | 165°46'W | 11   | CAPE THOMPSON           | United States | 1962/1962 | 1962-1962 | 100   |
| USW00093062 | 32°30'N | 106°25'W | 1270 | FRYE SITE               | United States | 1960/1960 | 1960-1960 | 155   |
| USW00094922 | 42°41'N | 92°29'W  | 306  | WAVERLY                 | United States | 1957/1964 | 1957-1958 | 665   |
|             |         |          |      |                         |               |           | 1964-1964 | 141   |
| USW00094925 | 47°57'N | 97°24'W  | 277  | GRAND FORKS AFB         | United States | 1960/1964 | 1960-1961 | 373   |
|             |         |          |      |                         |               |           | 1964-1964 | 139   |
| USXUA724586 | 38°48'N | 97°38'W  | 383  | SALINA                  | United States | 1953/1958 | 1953-1958 | 3550  |
| USXUA724755 | 37° 6'N | 113°36'W | 895  | ST. GEORGE              | United States | 1957/1957 | 1957-1957 | 591   |
| USXUA725185 | 43°14'N | 75°24'W  | 152  | ROME                    | United States | 1943/1955 | 1949-1955 | 7876  |
| USXUAC03522 | 38° 3'N | 103°31'W | 1278 | LA JUNTA                | United States | 1952/1952 | -         | 0     |
| USXUAC03540 | 38°57'N | 121° 4'W | 503  | AUBURN                  | United States | 1948/1948 | -         | 0     |
| USXUAC03546 | 40°11'N | 112°56'W | 1325 | DUGWAY                  | United States | 1944/1956 | -         | 0     |
| USXUAC03671 | 40° 7'N | 103°10'W | 1399 | AKRON                   | United States | 1952/1952 | -         | 0     |
| UVM00065503 | 12°21'N | 1°31'W   | 303  | OUAGADOUGOU             | Burkina Faso  | 1940/2016 | 1977-1981 | 143   |
|             |         |          |      |                         |               |           | 1998-2016 | 5636  |
| UZM00038413 | 41°44'N | 64°37'E  | 237  | TAMDY                   | Uzbekistan    | 1958/1991 | 1958-1991 | 23169 |
| UZM00038457 | 41°16'N | 69°16'E  | 493  | TASHKENT                | Uzbekistan    | 1939/2001 | 1946-2001 | 44574 |
| UZM00038606 | 40°33'N | 70°57'E  | 499  | KOKAND                  | Uzbekistan    | 1976/1996 | 1976-1993 | 5867  |
|             |         |          |      |                         |               |           | 1995-1996 | 152   |
| UZM00038927 | 37°14'N | 67°16'E  | 310  | TERMEZ                  | Uzbekistan    | 1963/1996 | 1963-1993 | 17717 |
|             |         |          |      |                         |               |           | 1995-1996 | 158   |
| VEM00080413 | 10°15'N | 67°39'W  | 436  | MARACAY - B.A. SUCRE    | Venezuela     | 1966/2014 | 1966-1967 | 132   |
|             |         |          |      |                         |               |           | 1969-1969 | 94    |
|             |         |          |      |                         |               |           | 1971-1972 | 117   |
|             |         |          |      |                         |               |           | 1974-1988 | 2800  |
|             |         |          |      |                         |               |           | 1991-1996 | 1261  |
|             |         |          |      |                         |               |           | 2005-2008 | 122   |
|             |         |          |      |                         |               |           | 2011-2014 | 169   |
| VEM00080422 | 10°40'N | 63°15'W  | 10   | CARUPANO                | Venezuela     | 2012/2014 | 2012-2014 | 159   |
| VEM00080444 | 8° 9'N  | 63°33'W  | 48   | CIUDAD BOLIVAR          | Venezuela     | 1974/2008 | 1986-1987 | 133   |
|             |         |          |      |                         |               |           | 2008-2008 | 78    |
| VEM00080447 | 7°51'N  | 72°27'W  | 377  | SAN ANTONIO DEL TACHIRA | Venezuela     | 1966/2013 | 1966-1966 | 67    |
|             |         |          |      |                         |               |           | 1974-1987 | 2270  |
|             |         |          |      |                         |               |           | 1992-1994 | 497   |
|             |         |          |      |                         |               |           | 2007-2013 | 620   |
| VEM00080450 | 7°54'N  | 67°25'W  | 47   | SAN FERNANDO DE APURE   | Venezuela     | 1974/2011 | 2005-2005 | 1     |
|             |         |          |      |                         |               |           | 2007-2011 | 226   |
| VEM00080462 | 4°36'N  | 61° 7'W  | 907  | SANTA ELENA DE UAIREN   | Venezuela     | 1974/2011 | 1974-1978 | 506   |

|             |         |          |      |                     |                |           |           |       |
|-------------|---------|----------|------|---------------------|----------------|-----------|-----------|-------|
|             |         |          |      |                     |                |           | 1982-1984 | 154   |
|             |         |          |      |                     |                |           | 2011-2011 | 45    |
| VEM00080476 | 10°31'N | 71°39'W  | 26   | LA CANADA           | Venezuela      | 1980/1986 | 1980-1984 | 368   |
|             |         |          |      |                     |                |           | 1986-1986 | 187   |
| VMM00048820 | 21° 2'N | 105°48'E | 5    | HA NOI              | Vietnam        | 1953/2016 | 1953-1954 | 206   |
|             |         |          |      |                     |                |           | 1958-1966 | 2232  |
|             |         |          |      |                     |                |           | 1979-2016 | 22891 |
| VMM00048839 | 20° 8'N | 107°43'E | 56   | BACH LONG VI        | Vietnam        | 2012/2016 | 2012-2016 | 1512  |
| VMM00048845 | 18°40'N | 105°41'E | 5    | VINH                | Vietnam        | 1960/2016 | 1960-1963 | 684   |
|             |         |          |      |                     |                |           | 2009-2016 | 2580  |
| VMM00048849 | 16°49'N | 107° 5'E | 28   | DONG HA             | Vietnam        | 1966/1968 | 1966-1968 | 571   |
| VMM00048851 | 16°44'N | 107°11'E | 11   | QUANG TRI           | Vietnam        | 1968/1971 | 1968-1971 | 1035  |
| VMM00048852 | 16°24'N | 107°41'E | 17   | HUE/PHU BAI         | Vietnam        | 1971/1972 | 1971-1972 | 499   |
| VMM00048855 | 16° 4'N | 108°21'E | 7    | DA NANG             | Vietnam        | 1962/2016 | 1962-2016 | 21373 |
| VMM00048858 | 14° 0'N | 108° 1'E | 807  | PLEIKU AB           | Vietnam        | 1970/1971 | 1970-1971 | 681   |
| VMM00048864 | 15°25'N | 108°42'E | 0    | CHU LAI             | Vietnam        | 1966/1971 | 1966-1971 | 821   |
| VMM00048867 | 13°58'N | 108°39'E | 495  | AN KHE (VVAK)       | Vietnam        | 1967/1970 | 1967-1967 | 30    |
|             |         |          |      |                     |                |           | 1970-1970 | 194   |
| VMM00048896 | 10°58'N | 106°49'E | 12   | BIEN HOA (VVBH)     | Vietnam        | 1969/1970 | 1969-1970 | 480   |
| VMM00048900 | 10°49'N | 106°40'E | 5    | TAN SON HOA         | Vietnam        | 1954/2016 | 1954-2016 | 28010 |
| VMM00048902 | 10°30'N | 107°10'E | 2    | BARIA (PHUOC LE)    | Vietnam        | 1970/1971 | 1970-1971 | 741   |
| VMXUAC03992 | 10°50'N | 106°58'E | 11   | AN LOC              | Vietnam        | 1952/1954 | -         | 0     |
| WAM00068014 | 19°36'S | 18° 7'E  | 1400 | GROOTFONTEIN        | Namibia        | 1970/1989 | 1970-1973 | 845   |
| WAM00068098 | 22°59'S | 14°39'E  | 88   | WALVIS BAY AIRPORT  | Namibia        | 1990/2016 | 1990-1990 | 171   |
|             |         |          |      |                     |                |           | 2011-2016 | 995   |
| WAM00068110 | 22°34'S | 17° 6'E  | 1725 | WINDHOEK            | Namibia        | 1986/2016 | 1986-2001 | 9399  |
|             |         |          |      |                     |                |           | 2006-2016 | 2356  |
| WAM00068112 | 22°29'S | 17°28'E  | 1700 | HOSEA KUTAKO INTL A | Namibia        | 1970/1985 | 1970-1985 | 7369  |
| WAM00068312 | 26°32'S | 18° 7'E  | 1064 | KEETMANSHOOP        | Namibia        | 1973/2014 | 2012-2014 | 730   |
| WIM00060096 | 23°43'N | 15°56'W  | 9    | DAKHLA              | Western Sahara | 1974/2016 | 2015-2016 | 501   |
| WQM00091245 | 19°17'N | 166°39'E | 7    | WAKE IS             | Wake Island    | 1946/1997 | 1946-1946 | 113   |
|             |         |          |      |                     |                |           | 1948-1997 | 38010 |
| YMM00041344 | 15°31'N | 44°11'E  | 2190 | SANA'A (CIV/MIL)    | Yemen          | 1983/1990 | 1983-1990 | 1463  |
| YMM00041360 | 14°45'N | 42°58'E  | 115  | HODEIDAH (CIV/MIL)  | Yemen          | 1983/1984 | 1983-1984 | 219   |
| YMM00041390 | 13°41'N | 44° 9'E  | 1385 | TAIZ (CIV/MIL)      | Yemen          | 1983/1984 | 1983-1984 | 427   |
| YMM00041404 | 15°23'N | 44°12'E  | 2190 | SANAA               | Yemen          | 1992/1998 | 1992-1994 | 184   |
|             |         |          |      |                     |                |           | 1996-1998 | 359   |
| YMM00041480 | 12°50'N | 45° 2'E  | 3    | ADEN                | Yemen          | 1929/1994 | 1949-1967 | 11903 |
|             |         |          |      |                     |                |           | 1992-1994 | 88    |
| ZAM00067475 | 10°13'S | 31° 8'E  | 1384 | KASAMA              | Zambia         | 1968/1993 | 1972-1973 | 65    |
| ZAM00067633 | 15°15'S | 23° 9'E  | 1053 | MONGU               | Zambia         | 1966/1993 | 1970-1970 | 77    |
|             |         |          |      |                     |                |           | 1972-1975 | 86    |
| ZAM00067663 | 14°25'S | 28°29'E  | 1165 | KABWE               | Zambia         | 1958/1982 | 1970-1970 | 141   |
|             |         |          |      |                     |                |           | 1972-1982 | 268   |
| ZAM00067666 | 15°25'S | 28°19'E  | 1280 | LUSAKA CITY AIRPORT | Zambia         | 1956/2000 | 1984-1995 | 1332  |
|             |         |          |      |                     |                |           | 1997-1997 | 32    |
|             |         |          |      |                     |                |           | 2000-2000 | 57    |
| ZIM00067774 | 17°50'S | 31° 1'E  | 1471 | HARARE (BELVEDERE)  | Zimbabwe       | 1970/2016 | 1970-1971 | 126   |
|             |         |          |      |                     |                |           | 1973-2000 | 6214  |
|             |         |          |      |                     |                |           | 2002-2003 | 81    |

[illegible]

|             |     |     |  |                             |       |           |           |       |
|-------------|-----|-----|--|-----------------------------|-------|-----------|-----------|-------|
| ZZV0000FNPH | N/A | N/A |  | FORT DESAIX                 | Ocean | 1987/2003 | 1987-1993 | 1691  |
|             |     |     |  |                             |       |           | 2000-2003 | 884   |
| ZZV0000FNRS | N/A | N/A |  | DOUCE FRANCE                | Ocean | 1986/2003 | 1986-1993 | 1622  |
|             |     |     |  |                             |       |           | 2000-2003 | 991   |
| ZZV0000FQFL | N/A | N/A |  | CMA-CGM FORT ST LOUIS (AWS) | Ocean | 2003/2006 | 2003-2006 | 506   |
| ZZV0000FQFM | N/A | N/A |  | CMA-CGM FORT SAINT PIERRE   | Ocean | 2003/2006 | 2003-2006 | 500   |
| ZZV0000JBOA | N/A | N/A |  | KEIFU MARU                  | Ocean | 1973/2000 | 1973-1992 | 2792  |
|             |     |     |  |                             |       |           | 2000-2000 | 73    |
| ZZV0000JCCX | N/A | N/A |  | CHOFU MARU                  | Ocean | 1988/2009 | 1988-1992 | 533   |
|             |     |     |  |                             |       |           | 2000-2009 | 1101  |
| ZZV0000JDWX | N/A | N/A |  | KOFU MARU                   | Ocean | 1989/2009 | 1989-1993 | 318   |
|             |     |     |  |                             |       |           | 2000-2009 | 925   |
| ZZV0000JGQH | N/A | N/A |  | RYOFU MARU                  | Ocean | 2000/2016 | 2000-2016 | 2424  |
| ZZV0000JIVB | N/A | N/A |  | SEIFU MARU                  | Ocean | 2000/2008 | 2000-2004 | 568   |
|             |     |     |  |                             |       |           | 2006-2008 | 276   |
| ZZV0000JNSR | N/A | N/A |  | MIRAI                       | Ocean | 2000/2016 | 2000-2006 | 1040  |
|             |     |     |  |                             |       |           | 2008-2016 | 3023  |
| ZZV0000KAOU | N/A | N/A |  | ROGER REVELLE (AWS)         | Ocean | 2011/2012 | 2011-2012 | 581   |
| ZZV0000KHRH | N/A | N/A |  | SEALAND DEVELOPER           | Ocean | 2003/2004 | 2003-2004 | 391   |
| ZZV0000KNIJ | N/A | N/A |  | MANULANI                    | Ocean | 1985/1987 | 1985-1987 | 724   |
| ZZV0000LDWR | N/A | N/A |  | POLARFRONT                  | Ocean | 1990/2009 | 1990-1993 | 3582  |
|             |     |     |  |                             |       |           | 2000-2009 | 11656 |
| ZZV0000LGKI | N/A | N/A |  | LANCE                       | Ocean | 2015/2015 | 2015-2015 | 255   |
| ZZV0000SWJS | N/A | N/A |  | PELJASPER                   | Ocean | 2000/2003 | 2000-2003 | 439   |
| ZZV0000UBLF | N/A | N/A |  | AKADEMIK KURCHATOV          | Ocean | 1974/1979 | 1974-1974 | 58    |
|             |     |     |  |                             |       |           | 1979-1979 | 84    |
| ZZV0000UBNZ | N/A | N/A |  | AKADEMIK SHULEYKIN          | Ocean | 1983/1991 | 1983-1991 | 1389  |
| ZZV0000UFTA | N/A | N/A |  | VOLGONEFT-131               | Ocean | 2008/2012 | 2008-2012 | 1068  |
| ZZV0000UHQ5 | N/A | N/A |  | AKADEMIK KOROLYOV           | Ocean | 1974/1990 | 1974-1990 | 2954  |
| ZZV0000UVMJ | N/A | N/A |  | VSEVOLOD BERYOZKIN          | Ocean | 1977/1983 | 1977-1983 | 663   |
| ZZV0000UZGH | N/A | N/A |  | PASSAT                      | Ocean | 1974/1991 | 1974-1991 | 2075  |
| ZZV0000V2LV | N/A | N/A |  | UAL TEXAS                   | Ocean | 1993/1993 | 1993-1993 | 144   |
| ZZV0000V2XM | N/A | N/A |  | SKOGAFOSS                   | Ocean | 2003/2007 | 2003-2007 | 425   |
| ZZV0000V2XO | N/A | N/A |  | LAGARFOSS                   | Ocean | 2001/2002 | 2001-2002 | 192   |
| ZZV0000VPHA | N/A | N/A |  | OOCL CHALLENGE              | Ocean | 1988/1992 | 1988-1992 | 1156  |
| ZZV0000WAAH | N/A | N/A |  | SEALAND MOTIVATOR           | Ocean | 2004/2005 | 2004-2005 | 360   |
| ZZV0000WPKD | N/A | N/A |  | GALVESTON BAY               | Ocean | 2001/2005 | 2001-2005 | 1229  |
| ZZV0000WTEC | N/A | N/A |  | RONALD H. BROWN (AWS)       | Ocean | 2000/2016 | 2000-2001 | 160   |
|             |     |     |  |                             |       |           | 2006-2009 | 493   |
|             |     |     |  |                             |       |           | 2016-2016 | 115   |
| ZZV0000ZDLG | N/A | N/A |  | BRANSFIELD                  | Ocean | 1986/1993 | 1986-1986 | 35    |
|             |     |     |  |                             |       |           | 1991-1993 | 252   |
| ZZV0000ZSAF | N/A | N/A |  | S. A. AGULHAS               | Ocean | 1989/2008 | 1989-1991 | 174   |
|             |     |     |  |                             |       |           | 2007-2008 | 147   |
| ZZV000ASDK3 | N/A | N/A |  | ASDK3                       | Ocean | 2009/2015 | 2009-2015 | 1926  |
| ZZV000ASFR1 | N/A | N/A |  | ASFR1                       | Ocean | 2007/2016 | 2007-2016 | 2455  |
| ZZV000ASFR2 | N/A | N/A |  | ASFR2                       | Ocean | 2007/2016 | 2007-2016 | 2295  |
| ZZV000ASFR3 | N/A | N/A |  | ASFR3                       | Ocean | 2010/2016 | 2010-2016 | 1589  |
| ZZV000ASFR4 | N/A | N/A |  | ASFR4                       | Ocean | 2010/2016 | 2010-2016 | 1551  |
| ZZV000ELML7 | N/A | N/A |  | HORN BAY                    | Ocean | 2000/2005 | 2000-2005 | 2307  |

|             |     |     |  |                     |       |           |           |      |
|-------------|-----|-----|--|---------------------|-------|-----------|-----------|------|
| ZZV000LADB2 | N/A | N/A |  | SKAUGRAN            | Ocean | 1992/1993 | 1992-1993 | 394  |
| ZZV000LAJV4 | N/A | N/A |  | SKAUBRYN            | Ocean | 1991/1992 | 1991-1992 | 163  |
| ZZV000OVYA2 | N/A | N/A |  | ARINA ARCTICA       | Ocean | 2000/2003 | 2000-2003 | 860  |
| ZZV000OXTS2 | N/A | N/A |  | IRENA ARCTICA       | Ocean | 2000/2007 | 2000-2004 | 552  |
|             |     |     |  |                     |       |           | 2007-2007 | 47   |
| ZZV000OXVH2 | N/A | N/A |  | NAJA ARCTICA        | Ocean | 2003/2006 | 2003-2006 | 630  |
| ZZV000OXYH2 | N/A | N/A |  | NUKA ARCTICA        | Ocean | 2000/2005 | 2000-2005 | 1335 |
| ZZV000P3OO4 | N/A | N/A |  | DRAGON BAY          | Ocean | 1992/1993 | 1992-1993 | 148  |
| ZZV000VSBV3 | N/A | N/A |  | CANMAR AMBASSADOR   | Ocean | 1992/1992 | 1992-1992 | 249  |
| ZZV000ZCBP6 | N/A | N/A |  | MISSISSAUGA EXPRESS | Ocean | 2000/2005 | 2000-2005 | 1069 |
| ZZV00ASDE01 | N/A | N/A |  | ASDE01              | Ocean | 2006/2014 | 2006-2014 | 2664 |
| ZZV00ASDE02 | N/A | N/A |  | ASDE02              | Ocean | 2006/2014 | 2006-2014 | 2064 |
| ZZV00ASDE03 | N/A | N/A |  | ASDE03              | Ocean | 2006/2014 | 2006-2014 | 2170 |
| ZZV00ASDE04 | N/A | N/A |  | ASDE04              | Ocean | 2006/2014 | 2006-2014 | 2639 |
| ZZV00ASDE09 | N/A | N/A |  | ASDE09              | Ocean | 2007/2013 | 2007-2009 | 151  |
|             |     |     |  |                     |       |           | 2011-2013 | 95   |
| ZZV00ASDK01 | N/A | N/A |  | ASDK01              | Ocean | 2007/2016 | 2007-2016 | 2479 |
| ZZV00ASDK02 | N/A | N/A |  | ASDK02              | Ocean | 2007/2016 | 2007-2016 | 2544 |
| ZZV00ASDK03 | N/A | N/A |  | ASDK03              | Ocean | 2015/2016 | 2015-2016 | 251  |
| ZZV00ASES01 | N/A | N/A |  | ASES01              | Ocean | 2008/2014 | 2008-2014 | 1268 |
| ZZV00ASEU01 | N/A | N/A |  | ASEU01              | Ocean | 2006/2014 | 2006-2014 | 1665 |
| ZZV00ASEU02 | N/A | N/A |  | ASEU02              | Ocean | 2007/2014 | 2007-2014 | 1665 |
| ZZV00ASEU03 | N/A | N/A |  | ASEU03              | Ocean | 2007/2014 | 2007-2014 | 1367 |
| ZZV00ASEU04 | N/A | N/A |  | ASEU04              | Ocean | 2006/2014 | 2006-2014 | 1592 |
| ZZV00ASEU05 | N/A | N/A |  | ASEU05              | Ocean | 2006/2014 | 2006-2014 | 2035 |
| ZZV00ASEU06 | N/A | N/A |  | ASEU06              | Ocean | 2011/2014 | 2011-2014 | 656  |
| ZZV00ASGB01 | N/A | N/A |  | ASGB01              | Ocean | 2007/2011 | 2007-2011 | 954  |
| ZZXUAICE002 | N/A | N/A |  | NP02                | Ocean | 1950/1950 | 1950-1950 | 171  |
| ZZXUAICE003 | N/A | N/A |  | NP03                | Ocean | 1954/1955 | 1954-1955 | 347  |
| ZZXUAICE004 | N/A | N/A |  | NP04                | Ocean | 1954/1957 | 1954-1957 | 1084 |
| ZZXUAICE005 | N/A | N/A |  | NP05                | Ocean | 1955/1956 | 1955-1956 | 342  |
| ZZXUAICE006 | N/A | N/A |  | NP06                | Ocean | 1956/1959 | 1956-1959 | 853  |
| ZZXUAICE007 | N/A | N/A |  | NP07                | Ocean | 1957/1959 | 1957-1959 | 671  |
| ZZXUAICE008 | N/A | N/A |  | NP08                | Ocean | 1959/1961 | 1959-1961 | 890  |
| ZZXUAICE009 | N/A | N/A |  | NP09                | Ocean | 1960/1961 | 1960-1961 | 269  |
| ZZXUAICE010 | N/A | N/A |  | NP10                | Ocean | 1961/1964 | 1961-1964 | 873  |
| ZZXUAICE011 | N/A | N/A |  | NP11                | Ocean | 1962/1963 | 1962-1963 | 327  |
| ZZXUAICE012 | N/A | N/A |  | NP12                | Ocean | 1963/1965 | 1963-1965 | 672  |
| ZZXUAICE013 | N/A | N/A |  | NP13                | Ocean | 1964/1967 | 1964-1967 | 1006 |
| ZZXUAICE014 | N/A | N/A |  | NP14                | Ocean | 1965/1965 | 1965-1965 | 170  |
| ZZXUAICE015 | N/A | N/A |  | NP15                | Ocean | 1966/1968 | 1966-1968 | 676  |
| ZZXUAICE016 | N/A | N/A |  | NP16                | Ocean | 1968/1972 | 1968-1972 | 1356 |
| ZZXUAICE017 | N/A | N/A |  | NP17                | Ocean | 1968/1969 | 1968-1969 | 482  |
| ZZXUAICE019 | N/A | N/A |  | NP19                | Ocean | 1969/1973 | 1969-1973 | 1146 |
| ZZXUAICE021 | N/A | N/A |  | NP21                | Ocean | 1972/1974 | 1972-1974 | 454  |
| ZZXUAICE022 | N/A | N/A |  | NP22                | Ocean | 1974/1982 | 1974-1982 | 2862 |
| ZZXUAICE026 | N/A | N/A |  | NP26                | Ocean | 1983/1986 | 1983-1986 | 824  |
| ZZXUAICE028 | N/A | N/A |  | NP28                | Ocean | 1986/1988 | 1986-1988 | 915  |
| ZZXUAICE030 | N/A | N/A |  | NP30                | Ocean | 1988/1990 | 1988-1990 | 576  |
| ZZXUAICE031 | N/A | N/A |  | NP31                | Ocean | 1989/1991 | 1989-1991 | 717  |
